# Supplementary material for: [Retracted] High‐Throughput Screen of Natural Compounds and Biomarkers for NSCLC Treatment by Differential Expression and Weighted Gene Coexpression Network Analysis (WGCNA)
Source: Hindawi journal article supplement (doi:10.1155/2021/5955343), 2021-01-01
Supplement: f1 [file 5955343.f1.pdf]

**Supplemental Table 1 Description of samples and classification**

| Groups | Extraction method | Sample name                                                 | Family          | Genus       | Pharmaceutical effect                           | Library ID | Treat   | data ID            |
|--------|-------------------|-------------------------------------------------------------|-----------------|-------------|-------------------------------------------------|------------|---------|--------------------|
| Group1 | S171              | <i>Ageratina adenophora</i>                                 | Asteraceae      | Ageratina   | Promoting blood circulation and removing stasis | A-549 71   | Treat15 | CL100120269_L01_87 |
| Group1 | S086              | <i>Gynura procumbens</i>                                    | Asteraceae      | Gynura      | Promoting blood circulation and removing stasis | A-549 52   | Treat62 | CL100144672_L02_68 |
| Group1 | S127              | <i>Kadsura coccinea</i>                                     | Schisandra ceae | Kadsura     | Promoting blood circulation and removing stasis | A-549 63   | Treat7  | CL100120269_L01_79 |
| Group1 | W3                | <i>Panax japonica</i> var major                             | Araliaceae      | Panax       | Promoting blood circulation and removing stasis | A-549 3    | Treat69 | CL100144714_L01_79 |
| Group1 | W1                | <i>Panax notoginseng</i>                                    | Araliaceae      | Panax       | Promoting blood circulation and removing stasis | A-549 1    | Treat67 | CL100144714_L01_77 |
| Group1 | W5                | <i>Panax stipuleanatus</i>                                  | Araliaceae      | Panax       | Promoting blood circulation and removing stasis | A-549 5    | Treat71 | CL100144714_L02_81 |
| Group1 | W4                | <i>Panax vietnamensis</i>                                   | Araliaceae      | Panax       | Promoting blood circulation and removing stasis | A-549 4    | Treat70 | CL100144714_L01_80 |
| Group1 | S083              | <i>Phyllanthus reticulatus</i> Poir. var. glaberMuell.-Age. | Euphorbiaceae   | Phyllanthus | Promoting blood circulation and removing stasis | A-549 49   | Treat59 | CL100144672_L02_65 |
| Group1 | GX0831            | <i>Salvia miltiorrhiza</i>                                  | Lamiaceae       | Salvia      | Promoting blood circulation and removing stasis | A-549 14   | Treat80 | CL100144714_L02_90 |
| Group1 | GX0824            | <i>Smilax scobinicaulis</i> C. H. Wright                    | Liliaceae       | Smilax      | Promoting blood circulation and removing stasis | A-549 9    | Treat75 | CL100144714_L02_85 |
| Group2 | S048              | <i>Abutilon indicum</i>                                     | Malvaceae       | Abutilon    | Heat-Clearing                                   | A-549 41   | Treat51 | CL100144672_L02_57 |
| Group2 | S071              | <i>Amaranthus tricolor</i>                                  | Amaranthaceae   | Amaranthus  | Heat-Clearing                                   | A-549 47   | Treat57 | CL100144672_L02_63 |
| Group2 | S055              | <i>Argyreia pierreana</i>                                   | Convolvulaceae  | Argyreia    | Heat-Clearing                                   | A-549 43   | Treat53 | CL100144672_L02_59 |
| Group2 | S059              | <i>Artemisia lactiflora</i>                                 | Asteraceae      | Artemisia   | Heat-Clearing                                   | A-549 45   | Treat55 | CL100144672_L02_61 |

|        |        |                                               |                |                 |                      |       |    |         |                     |
|--------|--------|-----------------------------------------------|----------------|-----------------|----------------------|-------|----|---------|---------------------|
| Group2 | S109   | <i>Chenopodium album</i>                      | Chenopodiaceae | Chenopodium     | Heat-Clearing        | A-549 | 57 | Treat1  | CL100120269_L01_73  |
| Group2 | S166   | <i>Dalbergia pinnata</i>                      | Fabaceae       | Dalbergia       | Heat-Clearing        | A-549 | 70 | Treat14 | CL100120269_L01_86  |
| Group2 | S044   | <i>Euphorbia hirta</i>                        | Euphorbiaceae  | Euphorbia       | Heat-Clearing        | A-549 | 39 | Treat46 | CL100144672_L01_47  |
| Group2 | GX0835 | <i>Forsythia suspensa</i>                     | Oleaceae       | Forsythia       | Heat-Clearing        | A-549 | 16 | Treat82 | CL100144714_L02_92  |
| Group2 | GX0850 | <i>Kummerowia striata</i>                     | Fabaceae       | Kummerowia      | Heat-Clearing        | A-549 | 26 | Treat37 | CL100144672_L01_102 |
| Group2 | S104   | <i>Mallotus apelta</i>                        | eae            | Mallotus        | Heat-Clearing        | A-549 | 56 | Treat66 | CL100144672_L02_72  |
| Group2 | S084   | <i>Malva verticillata</i> var. <i>crispa</i>  | Malvaceae      | Malva           | Heat-Clearing        | A-549 | 50 | Treat60 | CL100144672_L02_66  |
| Group2 | S047   | <i>Malvastrum coromandelianum</i>             | Malvaceae      | Malvastrum      | Heat-Clearing        | A-549 | 40 | Treat47 | CL100144672_L01_48  |
| Group2 | S125   | <i>Melia azedarach</i>                        | Meliaceae      | Melia           | Heat-Clearing        | A-549 | 62 | Treat6  | CL100120269_L01_78  |
| Group2 | GX0825 | <i>Paeonia anomala</i> subsp. <i>veitchii</i> | Paeoniaceae    | Paeonia         | Heat-Clearing        | A-549 | 10 | Treat76 | CL100144714_L02_86  |
| Group2 | S111   | <i>Polygonum perfoliatum</i>                  | Polygonaceae   | Polygonum       | Heat-Clearing        | A-549 | 58 | Treat2  | CL100120269_L01_74  |
| Group2 | GX0836 | <i>Scutellaria baicalensis</i>                | Lamiaceae      | Scutellaria     | Heat-Clearing        | A-549 | 17 | Treat83 | CL100144714_L02_93  |
| Group2 | S095   | <i>Senecio scandens</i>                       | Asteraceae     | Senecio         | Heat-Clearing        | A-549 | 53 | Treat63 | CL100144672_L02_69  |
| Group2 | S004   | <i>Sphagneticola calendulacea</i>             | Asteraceae     | Sphagneticola   | Heat-Clearing        | A-549 | 31 | Treat89 | CL100144736_L02_15  |
| Group2 | GX0842 | <i>Swertia leducii</i>                        | Gentianaceae   | Swertia         | Heat-Clearing        | A-549 | 21 | Treat48 | CL100144672_L01_97  |
| Group2 | S063   | <i>Tabernaemontana divaricata</i>             | Apocynaceae    | Tabernaemontana | Heat-Clearing        | A-549 | 46 | Treat56 | CL100144672_L02_62  |
| Group3 | S138   | <i>Breynia fruticosa</i>                      | Euphorbiaceae  | Breynia         | Rheumatism treatment | A-549 | 64 | Treat8  | CL100120269_L01_80  |
| Group3 | S008   | <i>Excoecaria cochinchinensis</i> Lour.       | Euphorbiaceae  | Excoecaria      | Rheumatism treatment | A-549 | 32 | Treat90 | CL100144736_L02_16  |
| Group3 | S008   | <i>Excoecaria cochinchinensis</i> Lour.       | Euphorbiaceae  | Excoecaria      | Rheumatism treatment | A-549 | 32 | Treat91 | CL100144736_L02_41  |
| Group3 | S118   | <i>Mucuna macrocarpa</i>                      | Fabaceae       | Mucuna          | Rheumatism treatment | A-549 | 60 | Treat4  | CL100120269_L01_76  |
| Group3 | GX0821 | <i>Pinus massoniana</i> Lamb.                 | Pinaceae       | Pinus           | Rheumatism treatment | A-549 | 6  | Treat72 | CL100144714_L02_82  |
| Group3 | S165   | <i>Trachelospermum jasminoides</i>            | Apocynaceae    | Trachelospermum | Rheumatism treatment | A-549 | 69 | Treat13 | CL100120269_L01_85  |
| Group4 | S029   | <i>Blumea riparia</i>                         | Asteraceae     | Blumea          | Hemostatic           | A-549 | 34 | Treat41 | CL100144672_L01_42  |
| Group4 | S034   | <i>Chromolaena odorata</i>                    | Asteraceae     | Chromolaena     | Hemostatic           | A-549 | 37 | Treat44 | CL100144672_L01_45  |

|        |        |                                                      |                  |              |                                                 |              |            |                         |
|--------|--------|------------------------------------------------------|------------------|--------------|-------------------------------------------------|--------------|------------|-------------------------|
| Group4 | W8     | <i>Panax zingiberensis</i><br>C. Y. Wu et K. M. Feng | Araliaceae       | Panax        | Hemostatic                                      | A-549<br>154 | Treat20    | CL100120269_L<br>02_44  |
| Group4 | S103   | <i>Phyllodium elegans</i>                            | Fabaceae         | Phyllodium   | Hemostatic                                      | A-549        | 55 Treat65 | CL100144672_L<br>02_71  |
| Group4 | S058   | <i>Pteris semipinnata</i>                            | Pteridaceae      | Pteris       | Hemostatic                                      | A-549        | 44 Treat54 | CL100144672_L<br>02_60  |
| Group4 | S162   | <i>Solanum erianthum</i>                             | Solanaceae       | Solanum      | Hemostatic                                      | A-549        | 68 Treat12 | CL100120269_L<br>01_84  |
| Group5 | GX0830 | <i>Angelica sinensis</i>                             | Apiaceae         | Angelica     | Tonic                                           | A-549        | 13 Treat79 | CL100144714_L<br>02_89  |
| Group5 | GX0857 | <i>Astragalus chinensis</i>                          | Fabaceae         | Astragalus   | Tonic                                           | A-549        | 29 Treat87 | CL100144736_L<br>02_13  |
| Group5 | GX0827 | <i>Astragalus membranaceus</i>                       | Leguminosae      | Astragalus   | Tonic                                           | A-549        | 12 Treat78 | CL100144714_L<br>02_88  |
| Group5 | GX0841 | <i>Chengiopanax fargesii</i>                         | Araliaceae       | Chengiopanax | Tonic                                           | A-549        | 20 Treat86 | CL100144714_L<br>02_96  |
| Group5 | GX0839 | <i>Cullen corylifolium</i>                           | Fabaceae         | Cullen       | Tonic                                           | A-549        | 19 Treat85 | CL100144714_L<br>02_95  |
| Group5 | GX0838 | <i>Lycium chinense</i>                               | Solanaceae       | Lycium       | Tonic                                           | A-549        | 18 Treat84 | CL100144714_L<br>02_94  |
| Group5 | W2     | <i>Panax ginseng</i><br>C. A. Meyer                  | Araliaceae       | Panax        | Tonic                                           | A-549        | 2 Treat68  | CL100144714_L<br>01_78  |
| Group5 | W6     | <i>Panax japonicus</i> var.<br><i>angustifolius</i>  | Araliaceae       | Panax        | Tonic                                           | A-549<br>153 | Treat19    | CL100120269_L<br>02_43  |
| Group5 | W7     | <i>Panax quinquefolium</i><br>Linn                   | Araliaceae       | Panax        | Tonic                                           | A-549<br>152 | Treat18    | CL100120269_L<br>02_42  |
| Group6 | S052   | <i>Acmella paniculata</i>                            | Asteraceae       | Acmella      | Rsthmatics,<br>expectorants and<br>antitussives | A-549        | 42 Treat52 | CL100144672_L<br>02_58  |
| Group6 | S161   | <i>Aristolochia tagala</i>                           | Aristolochiaceae | Aristolochia | Rsthmatics,<br>expectorants and<br>antitussives | A-549        | 67 Treat11 | CL100120269_L<br>01_83  |
| Group6 | GX0847 | <i>Crotalaria ferruginea</i>                         | Fabaceae         | Crotalaria   | Rsthmatics,<br>expectorants and<br>antitussives | A-549        | 24 Treat35 | CL100144672_L<br>01_100 |
| Group6 | GX0822 | <i>Inula japonica</i><br>Thunb.                      | Asteraceae       | Inula        | Rsthmatics,<br>expectorants and<br>antitussives | A-549        | 7 Treat73  | CL100144714_L<br>02_83  |
| Group7 | GX0855 | <i>Bischofia javanica</i>                            | Euphorbiaceae    | Bischofia    | Water-<br>disinhibiting and<br>damp-percolating | A-549        | 28 Treat39 | CL100144672_L<br>01_104 |
| Group7 | S031   | <i>Humulus scandens</i>                              | Cannabaceae      | Humulus      | Water-<br>disinhibiting and<br>damp-percolating | A-549        | 35 Treat42 | CL100144672_L<br>01_43  |

|         |        |                                              |                |             |                                          |       |     |         |                     |
|---------|--------|----------------------------------------------|----------------|-------------|------------------------------------------|-------|-----|---------|---------------------|
| Group7  | GX0849 | <i>Polygonum aviculare</i>                   | Polygonaceae   | Polygonum   | Water-disinhibiting and damp-percolating | A-549 | 25  | Treat36 | CL100144672_L01_101 |
| Group8  | S022   | <i>Cyperus rotundus</i>                      | Cyperaceae     | Cyperus     | Qi-regulating                            | A-549 | 33  | Treat40 | CL100144672_L01_41  |
| Group8  | GX0826 | Fruitlet of <i>Citrus aurantium</i> L.       | Rutaceae       | Citrus      | Qi-regulating                            | A-549 | 11  | Treat77 | CL100144714_L02_87  |
| Group8  | GX0858 | Immature fruit of <i>Citrus aurantium</i> L. | Rutaceae       | Citrus      | Qi-regulating                            | A-549 | 30  | Treat88 | CL100144736_L02_14  |
| Group9  | S120   | <i>Entada phaseoloides</i>                   | Fabaceae       | Entada      | Heat-clearingastringen                   | A-549 | 61  | Treat5  | CL100120269_L01_77  |
| Group9  | S000   | <i>Myristica fragrans</i>                    | Myristicaceae  | Myristica   | clearingastringen                        | A-549 | 73  | Treat17 | CL100120269_L02_41  |
| Group9  | GX0834 | <i>Schisandra chinensis</i>                  | Schisandraceae | Schisandra  | Heat-clearingastringen                   | A-549 | 15  | Treat81 | CL100144714_L02_91  |
| Group10 | S098   | <i>Gelsemium elegans</i>                     | Loganiaceae    | Gelsemium   | Detoxifying, analgesia, antipruritic     | A-549 | 54  | Treat64 | CL100144672_L02_70  |
| Group10 | S174   | <i>Ricinus communis</i>                      | Euphorbiaceae  | Ricinus     | Detoxifying, analgesia, antipruritic     | A-549 | 72  | Treat16 | CL100120269_L01_88  |
| Group11 | GX0823 | <i>Arctium lappa</i>                         | Asteraceae     | Arctium     | Unclassified                             | A-549 | 8   | Treat74 | CL100144714_L02_84  |
| Group11 | S147   | <i>Cornus macrophylla</i>                    | Cornaceae      | Cornus      | Unclassified                             | A-549 | 65  | Treat9  | CL100120269_L01_81  |
| Group11 | S040   | <i>Glycosmis pentaphylla</i>                 | Rutaceae       | Glycosmis   | Unclassified                             | A-549 | 38  | Treat45 | CL100144672_L01_46  |
| Group11 | S085   | <i>Ligustrum confusum</i>                    | Oleaceae       | Ligustrum   | Unclassified                             | A-549 | 51  | Treat61 | CL100144672_L02_67  |
| Group11 | S115   | <i>Mallotus barbatus</i>                     | Euphorbiaceae  | Mallotus    | Unclassified                             | A-549 | 59  | Treat3  | CL100120269_L01_75  |
| Group11 | GX0854 | <i>Platycodon grandiflorus</i>               | Campanulaceae  | Platycodon  | Unclassified                             | A-549 | 27  | Treat38 | CL100144672_L01_103 |
| Group11 | S081   | <i>Ricinus communis</i> L.                   | Euphorbiaceae  | Ricinus     | Unclassified                             | A-549 | 48  | Treat58 | CL100144672_L02_64  |
| Group11 | S033   | <i>Sesbania bispinosa</i>                    | Fabaceae       | Sesbania    | Unclassified                             | A-549 | 36  | Treat43 | CL100144672_L01_44  |
| Group11 | S033   | <i>Sesbania bispinosa</i>                    | Fabaceae       | Sesbania    | Unclassified                             | A-549 | 36  | Treat92 | CL100144736_L02_42  |
| Group11 | S155   | <i>Solanum aculeatissimum</i>                | Solanaceae     | Solanum     | Unclassified                             | A-549 | 66  | Treat10 | CL100120269_L01_82  |
| Group11 | GX0846 | <i>Solanum melongena</i>                     | Solanaceae     | Solanum     | Unclassified                             | A-549 | 23  | Treat50 | CL100144672_L01_99  |
| Group11 | GX0844 | <i>Zanthoxylum bungeanum</i> Maxim.          | Rutaceae       | Zanthoxylum | Unclassified                             | A-549 | 22  | Treat49 | CL100144672_L01_98  |
| Group12 | -      | Cabozantinib                                 | -              | -           | Positive controls                        | A-549 | 157 | Treat34 | CL100137964_L02_99  |

|             |        |                                                     |                   |                   |                                                       |                 |         |                         |
|-------------|--------|-----------------------------------------------------|-------------------|-------------------|-------------------------------------------------------|-----------------|---------|-------------------------|
| Group1<br>2 | -      | cis-Platinum 1                                      | -                 | -                 | Positive controls                                     | A-549<br>D1     | Treat28 | CL100137964_L<br>02_91  |
| Group1<br>2 | -      | cis-Platinum 2                                      | -                 | -                 | Positive controls                                     | A-549<br>D2     | Treat29 | CL100137964_L<br>02_92  |
| Group1<br>2 | -      | Docetaxel                                           | -                 | -                 | Positive controls                                     | A-549<br>160    | Treat25 | CL100137964_L<br>02_102 |
| Group1<br>2 | -      | Doxorubicin<br>hydrochloride                        | -                 | -                 | Positive controls                                     | A-549<br>156    | Treat33 | CL100137964_L<br>02_98  |
| Group1<br>2 | -      | Gefitinib                                           | -                 | -                 | Positive controls                                     | A-549<br>155    | Treat32 | CL100137964_L<br>02_97  |
| Group1<br>2 | -      | Gemcitabine                                         | -                 | -                 | Positive controls                                     | A-549<br>158    | Treat23 | CL100137964_L<br>02_100 |
| Group1<br>2 | -      | Lenvatinib                                          | -                 | -                 | Positive controls                                     | A-549<br>159    | Treat24 | CL100137964_L<br>02_101 |
| Group1<br>2 | -      | Paclitaxel 1                                        | -                 | -                 | Positive controls                                     | A-549<br>T1     | Treat30 | CL100137964_L<br>02_93  |
| Group1<br>2 | -      | Paclitaxel 2                                        | -                 | -                 | Positive controls                                     | A-549<br>T2     | Treat31 | CL100137964_L<br>02_94  |
| Group1<br>2 | -      | Sorafenib                                           | -                 | -                 | Positive controls                                     | A-549<br>161-1  | Treat26 | CL100137964_L<br>02_103 |
| Group1<br>2 | -      | Sorafenib                                           | -                 | -                 | Positive controls                                     | A-549<br>161-2  | Treat27 | CL100137964_L<br>02_104 |
| Group1<br>2 | -      | Viborelbine                                         | -                 | -                 | Positive controls                                     | A-549 162-<br>1 | Treat21 | CL100125983_L<br>01_2   |
| Group1<br>2 | -      | Viborelbine                                         | -                 | -                 | Positive controls                                     | A-549 162-<br>2 | Treat22 | CL100125983_L<br>01_3   |
| Group1<br>3 | -      | Control 1                                           | -                 | -                 | Negative<br>controls                                  | A-549<br>NC1    | CK      | CL100137964_L<br>02_89  |
| Group1<br>3 | -      | Control 2                                           | -                 | -                 | Negative<br>controls                                  | A-549<br>NC2    | CK      | CL100137964_L<br>02_90  |
| Group1<br>3 | -      | Control 8                                           | -                 | -                 | Negative<br>controls                                  | A-549<br>NC8    | CK      | CL100137964_L<br>02_95  |
| Group1<br>3 | -      | Control 9                                           | -                 | -                 | Negative<br>controls                                  | A-549<br>NC9    | CK      | CL100125983_L<br>01_1   |
| Group1<br>4 | W1     | <i>Panax<br/>notoginseng</i>                        | Araliaceae        | Panax             | Promoting blood<br>circulation and<br>removing stasis | A-549 1         | Treat67 | CL100144714_L<br>01_77  |
| Group1<br>4 | GX0831 | <i>Salvia<br/>miltiorrhiza</i>                      | Lamiaceae         | Salvia            | Promoting blood<br>circulation and<br>removing stasis | A-549 14        | Treat80 | CL100144714_L<br>02_90  |
| Group1<br>4 | S004   | <i>Sphagneticola<br/>calendulacea</i>               | Asteraceae        | Sphagneti<br>cola | Heat-Clearing                                         | A-549 31        | Treat89 | CL100144736_L<br>02_15  |
| Group1<br>4 | GX0835 | <i>Forsythia<br/>suspensa</i>                       | Oleaceae          | Forsythia         | Heat-Clearing                                         | A-549 16        | Treat82 | CL100144714_L<br>02_92  |
| Group1<br>4 | S111   | <i>Polygonum<br/>perfoliatum</i>                    | Polygonac<br>eae  | Polygonu<br>m     | Heat-Clearing                                         | A-549 58        | Treat2  | CL100120269_L<br>01_74  |
| Group1<br>4 | S084   | <i>Malva<br/>verticillata</i> var.<br><i>crispa</i> | Malvaceae         | Malva             | Heat-Clearing                                         | A-549 50        | Treat60 | CL100144672_L<br>02_66  |
| Group1<br>4 | S104   | <i>Mallotus apelta</i>                              | Euphorbiac<br>eae | Mallotus          | Heat-Clearing                                         | A-549 56        | Treat66 | CL100144672_L<br>02_72  |

|             |        |                                      |                      |                  |                                                 |       |    |         |                         |
|-------------|--------|--------------------------------------|----------------------|------------------|-------------------------------------------------|-------|----|---------|-------------------------|
| Group1<br>4 | S058   | <i>Pteris<br/>semipinnata</i>        | Pteridaceae          | Pteris           | Hemostatic                                      | A-549 | 44 | Treat54 | CL100144672_L<br>02_60  |
| Group1<br>4 | W2     | <i>Panax ginseng<br/>C. A. Meyer</i> | Araliaceae           | Panax            | Tonic                                           | A-549 | 2  | Treat68 | CL100144714_L<br>01_78  |
| Group1<br>4 | GX0827 | <i>Astragalus mem<br/>branaceus</i>  | Leguminos<br>ae      | Astragalus       | Tonic                                           | A-549 | 12 | Treat78 | CL100144714_L<br>02_88  |
| Group1<br>4 | GX0830 | <i>Angelica<br/>sinensis</i>         | Apiaceae             | Angelica         | Tonic                                           | A-549 | 13 | Treat79 | CL100144714_L<br>02_89  |
| Group1<br>4 | GX0838 | <i>Lycium<br/>chinense</i>           | Solanaceae           | Lycium           | Tonic                                           | A-549 | 18 | Treat84 | CL100144714_L<br>02_94  |
| Group1<br>4 | GX0839 | <i>Cullen<br/>corylifolium</i>       | Fabaceae             | Cullen           | Tonic                                           | A-549 | 19 | Treat85 | CL100144714_L<br>02_95  |
| Group1<br>4 | S052   | <i>Acmella<br/>paniculata</i>        | Asteraceae           | Acmella          | Rsthmatics,<br>expectorants and<br>antitussives | A-549 | 42 | Treat52 | CL100144672_L<br>02_58  |
| Group1<br>4 | S161   | <i>Aristolochia<br/>tagala</i>       | Aristolochi<br>aceae | Aristoloch<br>ia | Rsthmatics,<br>expectorants and<br>antitussives | A-549 | 67 | Treat11 | CL100120269_L<br>01_83  |
| Group1<br>4 | GX0855 | <i>Bischofia<br/>javanica</i>        | Euphorbiac<br>eae    | Bischofia        | Water-<br>disinhibiting and<br>damp-percolating | A-549 | 28 | Treat39 | CL100144672_L<br>01_104 |
| Group1<br>4 | GX0834 | <i>Schisandra<br/>chinensis</i>      | Schisandra<br>ceae   | Schisandra       | Heat-<br>clearingastringen<br>t                 | A-549 | 15 | Treat81 | CL100144714_L<br>02_91  |
| Group1<br>4 | S120   | <i>Entada<br/>phaseoloides</i>       | Fabaceae             | Entada           | Heat-<br>clearingastringen<br>t                 | A-549 | 61 | Treat5  | CL100120269_L<br>01_77  |
| Group1<br>4 | S098   | <i>Gelsemium<br/>elegans</i>         | Loganiacea<br>e      | Gelsemiu<br>m    | Detoxifying,<br>analgesia,<br>antipruritic      | A-549 | 54 | Treat64 | CL100144672_L<br>02_70  |
| Group1<br>4 | GX0823 | <i>Arctium lappa</i>                 | Asteraceae           | Arctium          | Unclassified                                    | A-549 | 8  | Treat74 | CL100144714_L<br>02_84  |
| Group1<br>4 | S081   | <i>Ricinus<br/>communis L.</i>       | Euphorbiac<br>eae    | Ricinus          | Unclassified                                    | A-549 | 48 | Treat58 | CL100144672_L<br>02_64  |
| Group1<br>4 | GX0854 | <i>Platycodon<br/>grandiflorus</i>   | Campanula<br>ceae    | Platycodo<br>n   | Unclassified                                    | A-549 | 27 | Treat38 | CL100144672_L<br>01_103 |
| Group1<br>4 | S085   | <i>Ligustrum<br/>confusum</i>        | Oleaceae             | Ligustrum        | Unclassified                                    | A-549 | 51 | Treat61 | CL100144672_L<br>02_67  |
| Group1<br>4 | S033   | <i>Sesbania<br/>bispinosa</i>        | Fabaceae             | Sesbania         | Unclassified                                    | A-549 | 36 | Treat43 | CL100144672_L<br>01_44  |

**Supplemental Table 2 Summary of RNA-seq data quality control**

| Sample Name |     |    | % Dups | % GC   | Length     | % Failed | M Seqs |
|-------------|-----|----|--------|--------|------------|----------|--------|
| CL100120269 | L01 | 73 | 1      | 58.20% | 47% 100 bp | 10%      | 41     |
| CL100120269 | L01 | 73 | 2      | 53.10% | 47% 100 bp | 10%      | 41     |
| CL100120269 | L01 | 74 | 1      | 59.30% | 47% 100 bp | 10%      | 37.2   |
| CL100120269 | L01 | 74 | 2      | 51.90% | 47% 100 bp | 10%      | 37.2   |
| CL100120269 | L01 | 75 | 1      | 58.30% | 47% 100 bp | 10%      | 40.7   |
| CL100120269 | L01 | 75 | 2      | 53.80% | 47% 100 bp | 10%      | 40.7   |
| CL100120269 | L01 | 76 | 1      | 58.60% | 47% 100 bp | 10%      | 35.2   |
| CL100120269 | L01 | 76 | 2      | 50.80% | 47% 100 bp | 10%      | 35.2   |
| CL100120269 | L01 | 77 | 1      | 58.90% | 47% 100 bp | 10%      | 30.7   |
| CL100120269 | L01 | 77 | 2      | 52.50% | 47% 100 bp | 10%      | 30.7   |
| CL100120269 | L01 | 78 | 1      | 57.40% | 47% 100 bp | 10%      | 34.3   |
| CL100120269 | L01 | 78 | 2      | 51.50% | 47% 100 bp | 10%      | 34.3   |
| CL100120269 | L01 | 79 | 1      | 58.10% | 47% 100 bp | 10%      | 34.4   |
| CL100120269 | L01 | 79 | 2      | 49.40% | 47% 100 bp | 0%       | 34.4   |
| CL100120269 | L01 | 80 | 1      | 60.30% | 46% 100 bp | 10%      | 35.9   |
| CL100120269 | L01 | 80 | 2      | 52.90% | 46% 100 bp | 10%      | 35.9   |
| CL100120269 | L01 | 81 | 1      | 57.50% | 46% 100 bp | 10%      | 29.9   |
| CL100120269 | L01 | 81 | 2      | 49.20% | 46% 100 bp | 0%       | 29.9   |
| CL100120269 | L01 | 82 | 1      | 58.30% | 46% 100 bp | 10%      | 32.7   |
| CL100120269 | L01 | 82 | 2      | 49.70% | 46% 100 bp | 0%       | 32.7   |
| CL100120269 | L01 | 83 | 1      | 58.60% | 46% 100 bp | 10%      | 34.8   |
| CL100120269 | L01 | 83 | 2      | 50.30% | 46% 100 bp | 10%      | 34.8   |
| CL100120269 | L01 | 84 | 1      | 59.20% | 46% 100 bp | 10%      | 37.4   |
| CL100120269 | L01 | 84 | 2      | 50.40% | 46% 100 bp | 10%      | 37.4   |
| CL100120269 | L01 | 85 | 1      | 58.00% | 46% 100 bp | 10%      | 31.4   |
| CL100120269 | L01 | 85 | 2      | 50.60% | 46% 100 bp | 10%      | 31.4   |
| CL100120269 | L01 | 86 | 1      | 62.30% | 46% 100 bp | 10%      | 32.9   |
| CL100120269 | L01 | 86 | 2      | 56.00% | 46% 100 bp | 10%      | 32.9   |
| CL100120269 | L01 | 87 | 1      | 56.60% | 46% 100 bp | 10%      | 29.8   |
| CL100120269 | L01 | 87 | 2      | 48.30% | 46% 100 bp | 0%       | 29.8   |
| CL100120269 | L01 | 88 | 1      | 56.40% | 46% 100 bp | 10%      | 31.1   |
| CL100120269 | L01 | 88 | 2      | 49.70% | 46% 100 bp | 0%       | 31.1   |
| CL100120269 | L02 | 41 | 1      | 64.60% | 46% 100 bp | 10%      | 41.2   |
| CL100120269 | L02 | 41 | 2      | 61.60% | 46% 100 bp | 10%      | 41.2   |
| CL100120269 | L02 | 42 | 1      | 63.00% | 46% 100 bp | 10%      | 31.3   |
| CL100120269 | L02 | 42 | 2      | 58.00% | 46% 100 bp | 10%      | 31.3   |
| CL100120269 | L02 | 43 | 1      | 64.10% | 46% 100 bp | 10%      | 34.9   |
| CL100120269 | L02 | 43 | 2      | 60.80% | 46% 100 bp | 10%      | 34.9   |
| CL100120269 | L02 | 44 | 1      | 62.50% | 46% 100 bp | 10%      | 34.7   |
| CL100120269 | L02 | 44 | 2      | 59.80% | 46% 100 bp | 10%      | 34.7   |
| CL100125983 | L01 | 1  | 1      | 60.30% | 47% 100 bp | 10%      | 50.6   |
| CL100125983 | L01 | 1  | 2      | 61.50% | 47% 100 bp | 10%      | 50.6   |
| CL100125983 | L01 | 2  | 1      | 58.30% | 47% 100 bp | 10%      | 49.6   |
| CL100125983 | L01 | 2  | 2      | 57.10% | 47% 100 bp | 10%      | 49.6   |
| CL100125983 | L01 | 3  | 1      | 57.50% | 47% 100 bp | 10%      | 32.3   |
| CL100125983 | L01 | 3  | 2      | 51.50% | 47% 100 bp | 10%      | 32.3   |

|             |     |     |   |        |     |        |     |      |
|-------------|-----|-----|---|--------|-----|--------|-----|------|
| CL100137964 | L02 | 100 | 1 | 62.30% | 48% | 100 bp | 10% | 43   |
| CL100137964 | L02 | 100 | 2 | 61.10% | 48% | 100 bp | 10% | 43   |
| CL100137964 | L02 | 101 | 1 | 67.80% | 47% | 100 bp | 10% | 48.4 |
| CL100137964 | L02 | 101 | 2 | 66.90% | 48% | 100 bp | 10% | 48.4 |
| CL100137964 | L02 | 102 | 1 | 61.90% | 47% | 100 bp | 10% | 45.3 |
| CL100137964 | L02 | 102 | 2 | 60.20% | 47% | 100 bp | 10% | 45.3 |
| CL100137964 | L02 | 103 | 1 | 66.20% | 47% | 100 bp | 10% | 49   |
| CL100137964 | L02 | 103 | 2 | 65.50% | 47% | 100 bp | 10% | 49   |
| CL100137964 | L02 | 104 | 1 | 63.80% | 48% | 100 bp | 10% | 43.8 |
| CL100137964 | L02 | 104 | 2 | 62.40% | 48% | 100 bp | 10% | 43.8 |
| CL100137964 | L02 | 89  | 1 | 68.80% | 47% | 100 bp | 10% | 50.6 |
| CL100137964 | L02 | 89  | 2 | 67.80% | 47% | 100 bp | 10% | 50.6 |
| CL100137964 | L02 | 90  | 1 | 56.70% | 47% | 100 bp | 10% | 40.2 |
| CL100137964 | L02 | 90  | 2 | 55.90% | 47% | 100 bp | 10% | 40.2 |
| CL100137964 | L02 | 91  | 1 | 63.40% | 47% | 100 bp | 10% | 47.5 |
| CL100137964 | L02 | 91  | 2 | 62.20% | 47% | 100 bp | 10% | 47.5 |
| CL100137964 | L02 | 92  | 1 | 61.30% | 47% | 100 bp | 10% | 43.8 |
| CL100137964 | L02 | 92  | 2 | 60.00% | 47% | 100 bp | 10% | 43.8 |
| CL100137964 | L02 | 93  | 1 | 64.00% | 47% | 100 bp | 10% | 47.7 |
| CL100137964 | L02 | 93  | 2 | 62.80% | 47% | 100 bp | 10% | 47.7 |
| CL100137964 | L02 | 94  | 1 | 67.40% | 47% | 100 bp | 10% | 48.1 |
| CL100137964 | L02 | 94  | 2 | 66.60% | 47% | 100 bp | 10% | 48.1 |
| CL100137964 | L02 | 95  | 1 | 64.60% | 47% | 100 bp | 10% | 46   |
| CL100137964 | L02 | 95  | 2 | 63.40% | 48% | 100 bp | 10% | 46   |
| CL100137964 | L02 | 97  | 1 | 63.80% | 47% | 100 bp | 10% | 44.5 |
| CL100137964 | L02 | 97  | 2 | 63.20% | 47% | 100 bp | 10% | 44.5 |
| CL100137964 | L02 | 98  | 1 | 58.50% | 48% | 100 bp | 10% | 41.9 |
| CL100137964 | L02 | 98  | 2 | 57.20% | 48% | 100 bp | 10% | 41.9 |
| CL100137964 | L02 | 99  | 1 | 63.40% | 48% | 100 bp | 10% | 46.4 |
| CL100137964 | L02 | 99  | 2 | 62.20% | 48% | 100 bp | 10% | 46.4 |
| CL100144672 | L01 | 100 | 1 | 71.20% | 47% | 100 bp | 10% | 42.5 |
| CL100144672 | L01 | 100 | 2 | 65.90% | 47% | 100 bp | 10% | 42.5 |
| CL100144672 | L01 | 101 | 1 | 75.00% | 47% | 100 bp | 10% | 41.4 |
| CL100144672 | L01 | 101 | 2 | 67.20% | 47% | 100 bp | 10% | 41.4 |
| CL100144672 | L01 | 102 | 1 | 74.40% | 46% | 100 bp | 10% | 51   |
| CL100144672 | L01 | 102 | 2 | 68.20% | 46% | 100 bp | 10% | 51   |
| CL100144672 | L01 | 103 | 1 | 73.30% | 47% | 100 bp | 10% | 46.1 |
| CL100144672 | L01 | 103 | 2 | 68.20% | 46% | 100 bp | 10% | 46.1 |
| CL100144672 | L01 | 104 | 1 | 73.20% | 47% | 100 bp | 10% | 41.7 |
| CL100144672 | L01 | 104 | 2 | 67.20% | 46% | 100 bp | 10% | 41.7 |
| CL100144672 | L01 | 41  | 1 | 73.00% | 47% | 100 bp | 10% | 44.1 |
| CL100144672 | L01 | 41  | 2 | 66.90% | 46% | 100 bp | 10% | 44.1 |
| CL100144672 | L01 | 42  | 1 | 70.90% | 46% | 100 bp | 10% | 38.5 |
| CL100144672 | L01 | 42  | 2 | 63.00% | 46% | 100 bp | 10% | 38.5 |
| CL100144672 | L01 | 43  | 1 | 73.60% | 46% | 100 bp | 10% | 40.6 |
| CL100144672 | L01 | 43  | 2 | 66.70% | 46% | 100 bp | 10% | 40.6 |
| CL100144672 | L01 | 44  | 1 | 69.20% | 46% | 100 bp | 10% | 33.9 |
| CL100144672 | L01 | 44  | 2 | 59.20% | 46% | 100 bp | 10% | 33.9 |



|             |     |    |   |        |     |        |     |      |
|-------------|-----|----|---|--------|-----|--------|-----|------|
| CL100144672 | L01 | 45 | 1 | 62.90% | 46% | 100 bp | 10% | 26.8 |
| CL100144672 | L01 | 45 | 2 | 50.80% | 46% | 100 bp | 10% | 26.8 |
| CL100144672 | L01 | 46 | 1 | 69.80% | 46% | 100 bp | 10% | 37.3 |
| CL100144672 | L01 | 46 | 2 | 61.00% | 46% | 100 bp | 10% | 37.3 |
| CL100144672 | L01 | 47 | 1 | 72.10% | 46% | 100 bp | 10% | 45.6 |
| CL100144672 | L01 | 47 | 2 | 65.60% | 46% | 100 bp | 10% | 45.6 |
| CL100144672 | L01 | 48 | 1 | 70.90% | 46% | 100 bp | 10% | 39.6 |
| CL100144672 | L01 | 48 | 2 | 63.30% | 46% | 100 bp | 10% | 39.6 |
| CL100144672 | L01 | 97 | 1 | 71.30% | 47% | 100 bp | 10% | 35.4 |
| CL100144672 | L01 | 97 | 2 | 63.00% | 47% | 100 bp | 10% | 35.4 |
| CL100144672 | L01 | 98 | 1 | 72.40% | 47% | 100 bp | 10% | 43.5 |
| CL100144672 | L01 | 98 | 2 | 66.60% | 47% | 100 bp | 10% | 43.5 |
| CL100144672 | L01 | 99 | 1 | 73.30% | 47% | 100 bp | 10% | 39   |
| CL100144672 | L01 | 99 | 2 | 65.50% | 46% | 100 bp | 10% | 39   |
| CL100144672 | L02 | 57 | 1 | 68.90% | 47% | 100 bp | 10% | 41.6 |
| CL100144672 | L02 | 57 | 2 | 67.00% | 47% | 100 bp | 10% | 41.6 |
| CL100144672 | L02 | 58 | 1 | 73.20% | 47% | 100 bp | 10% | 50.2 |
| CL100144672 | L02 | 58 | 2 | 72.10% | 47% | 100 bp | 10% | 50.2 |
| CL100144672 | L02 | 59 | 1 | 76.90% | 50% | 100 bp | 10% | 46.3 |
| CL100144672 | L02 | 59 | 2 | 74.40% | 50% | 100 bp | 10% | 46.3 |
| CL100144672 | L02 | 60 | 1 | 70.30% | 47% | 100 bp | 10% | 53   |
| CL100144672 | L02 | 60 | 2 | 69.60% | 47% | 100 bp | 10% | 53   |
| CL100144672 | L02 | 61 | 1 | 69.10% | 47% | 100 bp | 10% | 45.5 |
| CL100144672 | L02 | 61 | 2 | 67.10% | 47% | 100 bp | 10% | 45.5 |
| CL100144672 | L02 | 62 | 1 | 64.90% | 47% | 100 bp | 10% | 40.4 |
| CL100144672 | L02 | 62 | 2 | 64.00% | 47% | 100 bp | 10% | 40.4 |
| CL100144672 | L02 | 63 | 1 | 69.60% | 47% | 100 bp | 10% | 46.7 |
| CL100144672 | L02 | 63 | 2 | 68.40% | 47% | 100 bp | 10% | 46.7 |
| CL100144672 | L02 | 64 | 1 | 69.80% | 47% | 100 bp | 10% | 47.4 |
| CL100144672 | L02 | 64 | 2 | 68.70% | 47% | 100 bp | 10% | 47.4 |
| CL100144672 | L02 | 65 | 1 | 70.00% | 48% | 100 bp | 10% | 45.1 |
| CL100144672 | L02 | 65 | 2 | 68.80% | 48% | 100 bp | 10% | 45.1 |
| CL100144672 | L02 | 66 | 1 | 69.00% | 47% | 100 bp | 10% | 48.8 |
| CL100144672 | L02 | 66 | 2 | 68.00% | 47% | 100 bp | 10% | 48.8 |
| CL100144672 | L02 | 67 | 1 | 69.60% | 47% | 100 bp | 10% | 47.3 |
| CL100144672 | L02 | 67 | 2 | 68.00% | 47% | 100 bp | 10% | 47.3 |
| CL100144672 | L02 | 68 | 1 | 68.90% | 47% | 100 bp | 10% | 42.6 |
| CL100144672 | L02 | 68 | 2 | 67.00% | 47% | 100 bp | 10% | 42.6 |
| CL100144672 | L02 | 69 | 1 | 67.40% | 47% | 100 bp | 10% | 46.1 |
| CL100144672 | L02 | 69 | 2 | 67.00% | 47% | 100 bp | 10% | 46.1 |
| CL100144672 | L02 | 70 | 1 | 66.10% | 47% | 100 bp | 10% | 37.6 |
| CL100144672 | L02 | 70 | 2 | 63.50% | 47% | 100 bp | 10% | 37.6 |
| CL100144672 | L02 | 71 | 1 | 67.10% | 48% | 100 bp | 10% | 41.6 |
| CL100144672 | L02 | 71 | 2 | 64.60% | 47% | 100 bp | 10% | 41.6 |
| CL100144672 | L02 | 72 | 1 | 68.90% | 47% | 100 bp | 10% | 50.3 |
| CL100144672 | L02 | 72 | 2 | 67.30% | 47% | 100 bp | 10% | 50.3 |
| CL100144714 | L01 | 77 | 1 | 71.10% | 48% | 100 bp | 10% | 50.1 |
| CL100144714 | L01 | 77 | 2 | 70.50% | 48% | 100 bp | 10% | 50.1 |

|                      |     |    |   |        |     |        |     |      |
|----------------------|-----|----|---|--------|-----|--------|-----|------|
| CL100144714          | L01 | 78 | 1 | 59.50% | 47% | 100 bp | 10% | 40.7 |
| CL100144714          | L01 | 78 | 2 | 59.60% | 47% | 100 bp | 10% | 40.7 |
| CL100144714          | L01 | 79 | 1 | 63.30% | 48% | 100 bp | 10% | 28.9 |
| CL100144714          | L01 | 79 | 2 | 61.10% | 48% | 100 bp | 10% | 28.9 |
| CL100144714          | L01 | 80 | 1 | 66.60% | 48% | 100 bp | 10% | 34.2 |
| CL100144714          | L01 | 80 | 2 | 66.00% | 48% | 100 bp | 10% | 34.2 |
| CL100144714          | L02 | 81 | 1 | 70.90% | 47% | 100 bp | 10% | 49.1 |
| CL100144714          | L02 | 81 | 2 | 70.40% | 47% | 100 bp | 10% | 49.1 |
| CL100144714          | L02 | 82 | 1 | 69.20% | 47% | 100 bp | 10% | 42.8 |
| CL100144714          | L02 | 82 | 2 | 68.60% | 47% | 100 bp | 10% | 42.8 |
| CL100144714          | L02 | 83 | 1 | 69.70% | 47% | 100 bp | 10% | 42.5 |
| CL100144714          | L02 | 83 | 2 | 69.30% | 47% | 100 bp | 10% | 42.5 |
| CL100144714          | L02 | 84 | 1 | 69.50% | 47% | 100 bp | 10% | 43.1 |
| CL100144714          | L02 | 84 | 2 | 68.80% | 47% | 100 bp | 10% | 43.1 |
| CL100144714          | L02 | 85 | 1 | 71.70% | 47% | 100 bp | 10% | 40.6 |
| CL100144714          | L02 | 85 | 2 | 71.20% | 47% | 100 bp | 10% | 40.6 |
| CL100144714          | L02 | 86 | 1 | 71.80% | 47% | 100 bp | 10% | 53.4 |
| CL100144714          | L02 | 86 | 2 | 71.40% | 47% | 100 bp | 10% | 53.4 |
| CL100144714          | L02 | 87 | 1 | 70.90% | 47% | 100 bp | 10% | 50   |
| CL100144714          | L02 | 87 | 2 | 70.30% | 47% | 100 bp | 10% | 50   |
| CL100144714          | L02 | 88 | 1 | 69.20% | 47% | 100 bp | 10% | 42   |
| CL100144714          | L02 | 88 | 2 | 68.80% | 47% | 100 bp | 10% | 42   |
| CL100144714          | L02 | 89 | 1 | 70.50% | 47% | 100 bp | 10% | 52.5 |
| CL100144714          | L02 | 89 | 2 | 70.00% | 47% | 100 bp | 10% | 52.5 |
| CL100144714          | L02 | 90 | 1 | 71.00% | 46% | 100 bp | 10% | 42.8 |
| CL100144714          | L02 | 90 | 2 | 70.50% | 46% | 100 bp | 10% | 42.8 |
| CL100144714          | L02 | 91 | 1 | 71.80% | 47% | 100 bp | 10% | 51.1 |
| CL100144714          | L02 | 91 | 2 | 71.30% | 47% | 100 bp | 10% | 51.1 |
| CL100144714          | L02 | 92 | 1 | 69.60% | 47% | 100 bp | 10% | 40.5 |
| CL100144714          | L02 | 92 | 2 | 69.00% | 47% | 100 bp | 10% | 40.5 |
| CL100144714          | L02 | 93 | 1 | 69.60% | 47% | 100 bp | 10% | 41   |
| CL100144714          | L02 | 93 | 2 | 69.10% | 47% | 100 bp | 10% | 41   |
| CL100144714          | L02 | 94 | 1 | 68.70% | 47% | 100 bp | 10% | 36.9 |
| CL100144714          | L02 | 94 | 2 | 68.40% | 47% | 100 bp | 10% | 36.9 |
| CL100144714          | L02 | 95 | 1 | 69.60% | 47% | 100 bp | 10% | 40.9 |
| CL100144714          | L02 | 95 | 2 | 69.00% | 47% | 100 bp | 10% | 40.9 |
| CL100144714          | L02 | 96 | 1 | 69.70% | 47% | 100 bp | 10% | 40.5 |
| CL100144714          | L02 | 96 | 2 | 69.30% | 47% | 100 bp | 10% | 40.5 |
| CL100144736          | L02 | 13 | 1 | 67.10% | 46% | 100 bp | 10% | 52.1 |
| CL100144736          | L02 | 13 | 2 | 70.30% | 46% | 100 bp | 10% | 52.1 |
| CL100144736          | L02 | 14 | 1 | 67.30% | 46% | 100 bp | 10% | 51.6 |
| CL100144736          | L02 | 14 | 2 | 70.30% | 46% | 100 bp | 10% | 51.6 |
| CL100144736          | L02 | 15 | 1 | 65.60% | 47% | 100 bp | 10% | 48.1 |
| CL100144736          | L02 | 15 | 2 | 68.30% | 47% | 100 bp | 10% | 48.1 |
| CL100144736          | L02 | 16 | 1 | 65.10% | 46% | 100 bp | 10% | 45.3 |
| CL100144736          | L02 | 16 | 2 | 68.00% | 46% | 100 bp | 10% | 45.3 |
| CL100144736          | L02 | 41 | 1 | 64.00% | 46% | 100 bp | 10% | 42.5 |
| CL100144736_L02_41_2 |     |    |   | 66.00% | 46% | 100 bp | 10% | 42.5 |

---

|             |     |    |   |        |            |     |      |
|-------------|-----|----|---|--------|------------|-----|------|
| CL100144736 | L02 | 42 | 1 | 63.50% | 47% 100 bp | 10% | 42.5 |
| CL100144736 | L02 | 42 | 2 | 65.40% | 47% 100 bp | 10% | 42.5 |

---

**Table 3 RNA-seq data statistics**

| sample              | total raw reads | total raw base | total clean reads | total clean base | mapping rate |
|---------------------|-----------------|----------------|-------------------|------------------|--------------|
| CL100120269_L01_73  | 82008824        | 8200882400     | 79729218          | 7912797062       | 92.60%       |
| CL100120269_L01_74  | 74350910        | 7435091000     | 72425410          | 7186671234       | 96.70%       |
| CL100120269_L01_75  | 81319576        | 8131957600     | 79141634          | 7851958398       | 95.71%       |
| CL100120269_L01_76  | 70387168        | 7038716800     | 68624828          | 6809035916       | 95.98%       |
| CL100120269_L01_77  | 61414370        | 6141437000     | 59696106          | 5924058080       | 96.49%       |
| CL100120269_L01_78  | 68630096        | 6863009600     | 66709360          | 6609551178       | 96.07%       |
| CL100120269_L01_79  | 68807166        | 6880716600     | 66587598          | 6605056136       | 95.76%       |
| CL100120269_L01_80  | 71730234        | 7173023400     | 69627308          | 6906447644       | 94.89%       |
| CL100120269_L01_81  | 59894050        | 5989405000     | 57923596          | 5748223820       | 96.68%       |
| CL100120269_L01_82  | 65361948        | 6536194800     | 62793456          | 6227583332       | 96.53%       |
| CL100120269_L01_83  | 69662570        | 6966257000     | 67306992          | 6677226182       | 96.50%       |
| CL100120269_L01_84  | 74883776        | 7488377600     | 72127118          | 7153425922       | 95.78%       |
| CL100120269_L01_85  | 62830434        | 6283043400     | 60891768          | 6038754170       | 95.47%       |
| CL100120269_L01_86  | 65746904        | 6574690400     | 63924624          | 6339115696       | 95.70%       |
| CL100120269_L01_87  | 59546164        | 5954616400     | 57627350          | 5719049142       | 95.78%       |
| CL100120269_L01_88  | 62188890        | 6218889000     | 60322816          | 5980663542       | 96.41%       |
| CL100120269_L02_41  | 82435698        | 8243569800     | 80197116          | 7961663432       | 95.99%       |
| CL100120269_L02_42  | 62676296        | 6267629600     | 60532672          | 6009410110       | 96.53%       |
| CL100120269_L02_43  | 69722086        | 6972208600     | 67577820          | 6706767092       | 96.81%       |
| CL100120269_L02_44  | 69399516        | 6939951600     | 67432662          | 6690100338       | 95.98%       |
| CL100125983_L01_1   | 101125050       | 10112505000    | 98495616          | 9778069796       | 98.28%       |
| CL100125983_L01_2   | 99166218        | 9916621800     | 95763556          | 9516419792       | 97.66%       |
| CL100125983_L01_3   | 64623004        | 6462300400     | 62343184          | 6197728726       | 97.54%       |
| CL100137964_L02_100 | 86080436        | 8608043600     | 84519134          | 8424456792       | 97.15%       |
| CL100137964_L02_101 | 96708158        | 9670815800     | 94862928          | 9454377946       | 97.01%       |
| CL100137964_L02_102 | 90615208        | 9061520800     | 87331802          | 8701437782       | 98.03%       |
| CL100137964_L02_103 | 97963070        | 9796307000     | 96046814          | 9567575368       | 97.17%       |
| CL100137964_L02_104 | 87688196        | 8768819600     | 85989576          | 8570514180       | 97.10%       |
| CL100137964_L02_89  | 101270852       | 10127085200    | 99494876          | 9914021308       | 96.94%       |
| CL100137964_L02_90  | 80384888        | 8038488800     | 79082428          | 7882557176       | 97.01%       |
| CL100137964_L02_91  | 94930256        | 9493025600     | 93079130          | 9277311818       | 97.14%       |
| CL100137964_L02_92  | 87554314        | 8755431400     | 85960746          | 8567645270       | 97.26%       |
| CL100137964_L02_93  | 95449010        | 9544901000     | 93726676          | 9340911884       | 97.21%       |
| CL100137964_L02_94  | 96238478        | 9623847800     | 94842380          | 9450065844       | 97.12%       |
| CL100137964_L02_95  | 91988230        | 9198823000     | 90104378          | 8980146350       | 97.31%       |
| CL100137964_L02_97  | 88920024        | 8892002400     | 87395238          | 8710032044       | 96.94%       |
| CL100137964_L02_98  | 83763742        | 8376374200     | 82102856          | 8183245822       | 97.30%       |
| CL100137964_L02_99  | 92745436        | 9274543600     | 90648560          | 9034858770       | 97.16%       |
| CL100144672_L01_100 | 84958934        | 8495893400     | 82829156          | 8239013948       | 97.46%       |
| CL100144672_L01_101 | 82807384        | 8280738400     | 80890678          | 8049168014       | 97.22%       |
| CL100144672_L01_102 | 101999262       | 10199926200    | 99467524          | 9892629610       | 97.39%       |
| CL100144672_L01_103 | 92282896        | 9228289600     | 90182566          | 8966257096       | 97.55%       |
| CL100144672_L01_104 | 83463176        | 8346317600     | 81570016          | 8119678086       | 97.73%       |
| CL100144672_L01_41  | 88289562        | 8828956200     | 85798196          | 8538464894       | 97.41%       |
| CL100144672_L01_42  | 77019304        | 7701930400     | 74365460          | 7397562332       | 97.59%       |
| CL100144672_L01_43  | 81202924        | 8120292400     | 79433106          | 7904700662       | 97.17%       |
| CL100144672_L01_44  | 67833022        | 6783302200     | 65543092          | 6521154504       | 97.49%       |
| CL100144672_L01_45  | 53677736        | 5367773600     | 51541232          | 5126117156       | 97.02%       |
| CL100144672_L01_46  | 74661240        | 7466124000     | 72436276          | 7205676924       | 97.44%       |
| CL100144672_L01_47  | 91172432        | 9117243200     | 88278290          | 8782467200       | 97.40%       |
| CL100144672_L01_48  | 79245114        | 7924511400     | 77168460          | 7674807162       | 96.74%       |
| CL100144672_L01_97  | 70769266        | 7076926600     | 69161266          | 6883548198       | 97.60%       |

|                    |            |             |            |             |        |
|--------------------|------------|-------------|------------|-------------|--------|
| CL100144672_L01_98 | 87061270   | 8706127000  | 84970692   | 8458297448  | 97.76% |
| CL100144672_L01_99 | 78009172   | 7800917200  | 76112972   | 7578184066  | 97.28% |
| CL100144672_L02_57 | 83134164   | 8313416400  | 80694898   | 8039330318  | 97.40% |
| CL100144672_L02_58 | 100334976  | 10033497600 | 97681572   | 9728735982  | 96.53% |
| CL100144672_L02_59 | 92503994   | 9250399400  | 89626900   | 8925322948  | 96.83% |
| CL100144672_L02_60 | 105964108  | 10596410800 | 103278946  | 10284080524 | 97.34% |
| CL100144672_L02_61 | 91018192   | 9101819200  | 88526686   | 8818675392  | 97.15% |
| CL100144672_L02_62 | 80865704   | 8086570400  | 78772714   | 7844263352  | 97.51% |
| CL100144672_L02_63 | 93430146   | 9343014600  | 90478732   | 9014584592  | 97.49% |
| CL100144672_L02_64 | 94861150   | 9486115000  | 92328968   | 9198409334  | 97.39% |
| CL100144672_L02_65 | 90178728   | 9017872800  | 88129786   | 8780543100  | 97.24% |
| CL100144672_L02_66 | 97699460   | 9769946000  | 94589312   | 9422685632  | 97.44% |
| CL100144672_L02_67 | 94561616   | 9456161600  | 90587472   | 9022319654  | 97.72% |
| CL100144672_L02_68 | 85182390   | 8518239000  | 82065740   | 8174235938  | 97.53% |
| CL100144672_L02_69 | 92268560   | 9226856000  | 89842910   | 8939955416  | 97.38% |
| CL100144672_L02_70 | 75150742   | 7515074200  | 73381674   | 7302728148  | 96.94% |
| CL100144672_L02_71 | 83113416   | 8311341600  | 80609990   | 8032446134  | 97.47% |
| CL100144672_L02_72 | 100535122  | 10053512200 | 96305380   | 9593768568  | 97.48% |
| CL100144714_L01_77 | 100154606  | 10015460600 | 97657924   | 9728948358  | 97.46% |
| CL100144714_L01_78 | 81464674   | 8146467400  | 79107662   | 7870985604  | 85.84% |
| CL100144714_L01_79 | 57753162   | 5775316200  | 56202398   | 5598240812  | 96.34% |
| CL100144714_L01_80 | 68318538   | 6831853800  | 66955950   | 6671836048  | 97.04% |
| CL100144714_L02_81 | 98124416   | 9812441600  | 95876066   | 9558205254  | 97.25% |
| CL100144714_L02_82 | 85651694   | 8565169400  | 83318244   | 8305400144  | 97.28% |
| CL100144714_L02_83 | 84910180   | 8491018000  | 82697754   | 8243439976  | 97.02% |
| CL100144714_L02_84 | 86212296   | 8621229600  | 83631198   | 8332718282  | 97.36% |
| CL100144714_L02_85 | 81122400   | 8112240000  | 78948110   | 7864568524  | 96.94% |
| CL100144714_L02_86 | 106894450  | 10689445000 | 104277006  | 10390695280 | 97.19% |
| CL100144714_L02_87 | 100068832  | 10006883200 | 97885914   | 9760829032  | 97.34% |
| CL100144714_L02_88 | 83976080   | 8397608000  | 81895386   | 8159541850  | 97.18% |
| CL100144714_L02_89 | 104903298  | 10490329800 | 102569686  | 10221177038 | 97.09% |
| CL100144714_L02_90 | 85622492   | 8562249200  | 83774502   | 8350191084  | 96.64% |
| CL100144714_L02_91 | 102235384  | 10223538400 | 99516062   | 9919243852  | 96.85% |
| CL100144714_L02_92 | 80945096   | 8094509600  | 78616162   | 7834971692  | 96.93% |
| CL100144714_L02_93 | 81910274   | 8191027400  | 79711016   | 7943956914  | 97.42% |
| CL100144714_L02_94 | 73816284   | 7381628400  | 71896710   | 7157270164  | 97.19% |
| CL100144714_L02_95 | 81840088   | 8184008800  | 79144016   | 7887253208  | 97.70% |
| CL100144714_L02_96 | 80961060   | 8096106000  | 78653134   | 7841448466  | 97.43% |
| CL100144736_L02_13 | 104270526  | 10427052600 | 102174712  | 10176373764 | 97.21% |
| CL100144736_L02_14 | 103188016  | 10318801600 | 101359632  | 10101554514 | 97.57% |
| CL100144736_L02_15 | 96299916   | 9629991600  | 94561772   | 9425180090  | 97.50% |
| CL100144736_L02_16 | 90584634   | 9058463400  | 88895170   | 8859049264  | 97.36% |
| CL100144736_L02_41 | 85082014   | 8508201400  | 83306592   | 8303527050  | 97.89% |
| CL100144736_L02_42 | 84954808   | 8495480800  | 82773434   | 8248971882  | 98.11% |
| Total              | 8066731626 | 806.67G     | 7855046204 | 785.50G     |        |

**Supplemental Table 4 Differential gene expression**

| Compare       | Significant | Up-regulated | Down-regulated | Sample name                                                         | Note          |
|---------------|-------------|--------------|----------------|---------------------------------------------------------------------|---------------|
| Treat53_vs_CK | 6130        | 2479         | 3651           | <i>Argyreia pierreana</i>                                           | Candidate TCM |
| Treat91_vs_CK | 1865        | 966          | 899            | <i>Excoecaria cochinchinensis</i> Lour.                             |               |
| Treat8_vs_CK  | 1651        | 867          | 784            | <i>Breynia fruticosa</i>                                            | Candidate TCM |
| Treat56_vs_CK | 1541        | 566          | 975            | <i>Tabernaemontana divaricata</i>                                   |               |
| Treat63_vs_CK | 1162        | 550          | 612            | <i>Senecio scandens</i>                                             | Candidate TCM |
| Treat6_vs_CK  | 956         | 350          | 606            | <i>Melia azedarach</i>                                              |               |
| Treat59_vs_CK | 814         | 527          | 287            | <i>Phyllanthus reticulatus</i> Poir. var. <i>glaber</i> Muell.-Age. |               |
| Treat44_vs_CK | 745         | 266          | 479            | <i>Chromolaena</i>                                                  |               |
| Treat27_vs_CK | 645         | 186          | 459            | <i>Sorafenib</i><br><i>Excoecaria</i>                               |               |
| Treat90_vs_CK | 627         | 259          | 368            | <i>cochinchinensis</i><br><i>Lour</i>                               |               |
| Treat3_vs_CK  | 612         | 231          | 381            |                                                                     |               |
| Treat64_vs_CK | 555         | 239          | 316            |                                                                     |               |
| Treat11_vs_CK | 554         | 270          | 284            |                                                                     |               |
| Treat12_vs_CK | 542         | 149          | 393            |                                                                     |               |
| Treat60_vs_CK | 533         | 192          | 341            |                                                                     |               |
| Treat58_vs_CK | 479         | 167          | 312            |                                                                     |               |
| Treat26_vs_CK | 453         | 129          | 324            |                                                                     |               |
| Treat65_vs_CK | 431         | 187          | 244            |                                                                     |               |
| Treat7_vs_CK  | 346         | 172          | 174            |                                                                     |               |
| Treat40_vs_CK | 276         | 104          | 172            |                                                                     |               |
| Treat47_vs_CK | 259         | 85           | 174            |                                                                     |               |
| Treat41_vs_CK | 227         | 68           | 159            |                                                                     |               |
| Treat5_vs_CK  | 200         | 64           | 136            |                                                                     |               |
| Treat51_vs_CK | 187         | 77           | 110            |                                                                     |               |
| Treat92_vs_CK | 185         | 68           | 117            |                                                                     |               |
| Treat43_vs_CK | 184         | 42           | 142            |                                                                     |               |
| Treat18_vs_CK | 177         | 33           | 144            |                                                                     |               |
| Treat17_vs_CK | 173         | 84           | 89             |                                                                     |               |
| Treat32_vs_CK | 172         | 131          | 41             |                                                                     |               |
| Treat42_vs_CK | 172         | 52           | 120            |                                                                     |               |
| Treat48_vs_CK | 170         | 65           | 105            |                                                                     |               |
| Treat45_vs_CK | 162         | 42           | 120            |                                                                     |               |
| Treat13_vs_CK | 159         | 40           | 119            |                                                                     |               |

|               |     |    |     |
|---------------|-----|----|-----|
| Treat9_vs_CK  | 157 | 23 | 134 |
| Treat19_vs_CK | 156 | 32 | 124 |
| Treat74_vs_CK | 156 | 63 | 93  |
| Treat14_vs_CK | 149 | 23 | 126 |
| Treat83_vs_CK | 148 | 93 | 55  |
| Treat15_vs_CK | 147 | 24 | 123 |
| Treat46_vs_CK | 135 | 40 | 95  |
| Treat1_vs_CK  | 131 | 37 | 94  |
| Treat75_vs_CK | 128 | 86 | 42  |
| Treat33_vs_CK | 127 | 95 | 32  |
| Treat23_vs_CK | 112 | 83 | 29  |
| Treat57_vs_CK | 109 | 14 | 95  |
| Treat89_vs_CK | 109 | 26 | 83  |
| Treat39_vs_CK | 102 | 67 | 35  |
| Treat76_vs_CK | 102 | 55 | 47  |
| Treat36_vs_CK | 98  | 49 | 49  |
| Treat35_vs_CK | 96  | 49 | 47  |
| Treat50_vs_CK | 95  | 32 | 63  |
| Treat16_vs_CK | 93  | 36 | 57  |
| Treat52_vs_CK | 92  | 33 | 59  |
| Treat80_vs_CK | 82  | 26 | 56  |
| Treat66_vs_CK | 81  | 18 | 63  |
| Treat37_vs_CK | 80  | 27 | 53  |
| Treat72_vs_CK | 79  | 27 | 52  |
| Treat10_vs_CK | 78  | 12 | 66  |
| Treat54_vs_CK | 65  | 25 | 40  |
| Treat62_vs_CK | 64  | 28 | 36  |
| Treat49_vs_CK | 60  | 46 | 14  |
| Treat61_vs_CK | 59  | 14 | 45  |
| Treat88_vs_CK | 59  | 20 | 39  |
| Treat85_vs_CK | 55  | 27 | 28  |
| Treat34_vs_CK | 52  | 40 | 12  |
| Treat87_vs_CK | 48  | 15 | 33  |
| Treat55_vs_CK | 47  | 22 | 25  |
| Treat20_vs_CK | 46  | 12 | 34  |
| Treat79_vs_CK | 46  | 38 | 8   |
| Treat73_vs_CK | 45  | 14 | 31  |
| Treat78_vs_CK | 45  | 39 | 6   |
| Treat69_vs_CK | 41  | 22 | 19  |
| Treat81_vs_CK | 38  | 18 | 20  |
| Treat77_vs_CK | 37  | 11 | 26  |
| Treat4_vs_CK  | 36  | 12 | 24  |
| Treat38_vs_CK | 31  | 13 | 18  |
| Treat29_vs_CK | 30  | 19 | 11  |
| Treat25_vs_CK | 29  | 15 | 14  |
| Treat67_vs_CK | 28  | 16 | 12  |
| Treat2_vs_CK  | 27  | 11 | 16  |
| Treat21_vs_CK | 22  | 12 | 10  |
| Treat28_vs_CK | 22  | 13 | 9   |
| Treat30_vs_CK | 22  | 12 | 10  |
| Treat71_vs_CK | 22  | 12 | 10  |
| Treat22_vs_CK | 21  | 11 | 10  |
| Treat68_vs_CK | 21  | 11 | 10  |

|               |    |    |    |
|---------------|----|----|----|
| Treat70_vs_CK | 20 | 13 | 7  |
| Treat31_vs_CK | 18 | 5  | 13 |
| Treat82_vs_CK | 17 | 8  | 9  |
| Treat84_vs_CK | 17 | 8  | 9  |
| Treat86_vs_CK | 15 | 8  | 7  |
| Treat24_vs_CK | 13 | 5  | 8  |

---



**Supplemental Table 5 Pathway results of traditional Chinese medicine and positive control**

| Treat   | Description                                | pvalue   | p.adjust | qvalue   |
|---------|--------------------------------------------|----------|----------|----------|
| Treat1  | Complement and coagulation cascades        | 0.000183 | 0.021053 | 0.021053 |
| Treat3  | Complement and coagulation cascades        | 2.85E-07 | 7.69E-05 | 7.41E-05 |
|         | Cell cycle                                 | 1.75E-08 | 5.05E-06 | 4.69E-06 |
| Treat6  | DNA replication                            | 9.58E-07 | 0.000138 | 0.000129 |
|         | p53 signaling pathway                      | 2.93E-05 | 0.00282  | 0.002619 |
|         | Retinol metabolism                         | 7.33E-05 | 0.005298 | 0.004921 |
|         | Complement and coagulation cascades        | 2.44E-09 | 7.52E-07 | 6.66E-07 |
|         | MAPK signaling pathway                     | 1.50E-06 | 0.00023  | 0.000204 |
|         | NF-kappa B signaling pathway               | 0.00011  | 0.011341 | 0.010038 |
| Treat8  | Fluid shear stress and atherosclerosis     | 0.000291 | 0.018273 | 0.016174 |
|         | Protein digestion and absorption           | 0.000297 | 0.018273 | 0.016174 |
|         | Retinol metabolism                         | 0.000844 | 0.043303 | 0.03833  |
|         | Dilated cardiomyopathy                     | 0.00108  | 0.047534 | 0.042075 |
|         | p53 signaling pathway                      | 1.80E-10 | 4.85E-08 | 4.69E-08 |
| Treat11 | Platinum drug resistance                   | 6.86E-05 | 0.009267 | 0.00896  |
|         | Glioma                                     | 0.00048  | 0.043179 | 0.041748 |
| Treat14 | Signaling pathways regulating pluripotency | 0.000114 | 0.008446 | 0.007449 |
|         | TGF-beta signaling pathway                 | 0.000283 | 0.010473 | 0.009237 |
| Treat16 | Biosynthesis of amino acids                | 0.000228 | 0.017766 | 0.015104 |
|         | Oxidative phosphorylation                  | 0.003856 | 0.024408 | 0.006851 |
|         | Retrograde endocannabinoid signaling       | 0.004755 | 0.024408 | 0.006851 |
|         | Non-alcoholic fatty liver disease          | 0.004882 | 0.024408 | 0.006851 |
|         | Thermogenesis                              | 0.011296 | 0.032625 | 0.009158 |
| Treat21 | Nitrogen metabolism                        | 0.012551 | 0.032625 | 0.009158 |
|         | Parkinson disease                          | 0.01305  | 0.032625 | 0.009158 |
|         | Prion disease                              | 0.015567 | 0.033358 | 0.009364 |
|         | Huntington disease                         | 0.019351 | 0.036283 | 0.010185 |
|         | Amyotrophic lateral sclerosis              | 0.026868 | 0.041349 | 0.011607 |
|         | Alzheimer disease                          | 0.027566 | 0.041349 | 0.011607 |
|         | Oxidative phosphorylation                  | 0.002599 | 0.015374 | 0.002312 |
|         | Retrograde endocannabinoid signaling       | 0.003208 | 0.015374 | 0.002312 |
|         | Non-alcoholic fatty liver disease          | 0.003294 | 0.015374 | 0.002312 |
|         | Thermogenesis                              | 0.007674 | 0.024764 | 0.003724 |
|         | Parkinson disease                          | 0.008879 | 0.024764 | 0.003724 |
| Treat22 | Prion disease                              | 0.010613 | 0.024764 | 0.003724 |
|         | Huntington disease                         | 0.013229 | 0.026458 | 0.003979 |
|         | Amyotrophic lateral sclerosis              | 0.018457 | 0.029468 | 0.004431 |
|         | Alzheimer disease                          | 0.018944 | 0.029468 | 0.004431 |
|         | Proteasome                                 | 0.028126 | 0.038915 | 0.005852 |
|         | Pathways of neurodegeneration - multiple d | 0.030576 | 0.038915 | 0.005852 |
|         | p53 signaling pathway                      | 4.48E-10 | 4.75E-08 | 3.91E-08 |
| Treat23 | Transcriptional misregulation in cancer    | 0.000128 | 0.006782 | 0.00559  |
|         | Platinum drug resistance                   | 0.000231 | 0.006793 | 0.005599 |
|         | Glioma                                     | 0.000256 | 0.006793 | 0.005599 |
|         | Spliceosome                                | 0.004946 | 0.02919  | 0.010242 |
|         | Nitrogen metabolism                        | 0.012551 | 0.02919  | 0.010242 |

|         |                                            |          |          |          |
|---------|--------------------------------------------|----------|----------|----------|
| Treat25 | 2-Oxocarboxylic acid metabolism            | 0.014018 | 0.02919  | 0.010242 |
|         | One carbon pool by folate                  | 0.014752 | 0.02919  | 0.010242 |
|         | Arginine biosynthesis                      | 0.016217 | 0.02919  | 0.010242 |
|         | Antifolate resistance                      | 0.022788 | 0.034181 | 0.011993 |
|         | Cell cycle                                 | 2.07E-07 | 4.95E-05 | 3.95E-05 |
|         | p53 signaling pathway                      | 4.59E-07 | 5.49E-05 | 4.37E-05 |
|         | Cellular senescence                        | 2.92E-06 | 0.000233 | 0.000185 |
|         | Viral carcinogenesis                       | 1.16E-05 | 0.000696 | 0.000555 |
|         | Alcoholism                                 | 2.12E-05 | 0.001012 | 0.000807 |
|         | Small cell lung cancer                     | 0.00019  | 0.007559 | 0.006026 |
| Treat26 | Glioma                                     | 0.000312 | 0.010637 | 0.00848  |
|         | Neutrophil extracellular trap formation    | 0.000465 | 0.01388  | 0.011065 |
|         | Systemic lupus erythematosus               | 0.000592 | 0.015712 | 0.012525 |
|         | GnRH signaling pathway                     | 0.001147 | 0.026596 | 0.021202 |
|         | Prostate cancer                            | 0.001468 | 0.026596 | 0.021202 |
|         | Human T-cell leukemia virus 1 infection    | 0.001501 | 0.026596 | 0.021202 |
|         | Cushing syndrome                           | 0.001502 | 0.026596 | 0.021202 |
|         | Endocrine resistance                       | 0.001558 | 0.026596 | 0.021202 |
|         | Fluid shear stress and atherosclerosis     | 0.002894 | 0.046104 | 0.036753 |
|         | Cell cycle                                 | 1.90E-06 | 0.000484 | 0.000425 |
| Treat27 | p53 signaling pathway                      | 0.000399 | 0.041389 | 0.036363 |
|         | Viral carcinogenesis                       | 0.000489 | 0.041389 | 0.036363 |
|         | Alcoholism                                 | 0.000687 | 0.043648 | 0.038348 |
| Treat29 | p53 signaling pathway                      | 9.80E-08 | 8.63E-06 | 7.33E-06 |
|         | Platinum drug resistance                   | 0.000239 | 0.010524 | 0.008938 |
|         | Measles                                    | 0.001574 | 0.046179 | 0.039219 |
| Treat32 | Steroid biosynthesis                       | 6.65E-13 | 7.39E-11 | 6.86E-11 |
|         | Terpenoid backbone biosynthesis            | 4.54E-07 | 2.52E-05 | 2.34E-05 |
|         | Biosynthesis of amino acids                | 0.00022  | 0.008143 | 0.007568 |
|         | Cysteine and methionine metabolism         | 0.000489 | 0.013563 | 0.012604 |
|         | p53 signaling pathway                      | 2.87E-12 | 3.94E-10 | 3.24E-10 |
|         | Platinum drug resistance                   | 3.85E-05 | 0.002634 | 0.002166 |
|         | FoxO signaling pathway                     | 6.01E-05 | 0.002743 | 0.002255 |
| Treat33 | Epstein-Barr virus infection               | 8.21E-05 | 0.002812 | 0.002312 |
|         | Melanoma                                   | 0.000548 | 0.01318  | 0.010836 |
|         | Glioma                                     | 0.00064  | 0.01318  | 0.010836 |
|         | Chronic myeloid leukemia                   | 0.000673 | 0.01318  | 0.010836 |
|         | Thyroid cancer                             | 0.000959 | 0.016327 | 0.013423 |
|         | Colorectal cancer                          | 0.001073 | 0.016327 | 0.013423 |
|         | Small cell lung cancer                     | 0.001379 | 0.018894 | 0.015533 |
|         | Endometrial cancer                         | 0.003525 | 0.043907 | 0.036097 |
|         | Cell cycle                                 | 0.004095 | 0.04675  | 0.038434 |
|         | Basal cell carcinoma                       | 0.004454 | 0.046941 | 0.038592 |
| Treat35 | Complement and coagulation cascades        | 0.000415 | 0.032825 | 0.030393 |
|         | IL-17 signaling pathway                    | 0.000608 | 0.032825 | 0.030393 |
| Treat36 | TGF-beta signaling pathway                 | 0.000283 | 0.014436 | 0.013408 |
|         | Signaling pathways regulating pluripotency | 0.00138  | 0.035184 | 0.032679 |
| Treat39 | TGF-beta signaling pathway                 | 0.000128 | 0.011647 | 0.011451 |
|         | Signaling pathways regulating pluripotency | 0.000639 | 0.029077 | 0.028589 |
| Treat40 | MAPK signaling pathway                     | 7.59E-05 | 0.01488  | 0.014065 |

|                                         |                                            |          |          |          |
|-----------------------------------------|--------------------------------------------|----------|----------|----------|
| Treat43                                 | Steroid biosynthesis                       | 1.06E-05 | 0.001409 | 0.001327 |
|                                         | Terpenoid backbone biosynthesis            | 0.000489 | 0.031436 | 0.029607 |
|                                         | Fatty acid metabolism                      | 0.000709 | 0.031436 | 0.029607 |
|                                         | Cell cycle                                 | 1.97E-16 | 4.65E-14 | 4.21E-14 |
|                                         | p53 signaling pathway                      | 3.94E-14 | 4.65E-12 | 4.21E-12 |
|                                         | DNA replication                            | 9.04E-11 | 7.11E-09 | 6.44E-09 |
|                                         | Cellular senescence                        | 5.02E-06 | 0.000296 | 0.000268 |
| Treat44                                 | Apoptosis                                  | 8.27E-05 | 0.003902 | 0.003533 |
|                                         | Mismatch repair                            | 0.000328 | 0.012891 | 0.011672 |
|                                         | Progesterone-mediated oocyte maturation    | 0.000382 | 0.012891 | 0.011672 |
|                                         | Fanconi anemia pathway                     | 0.000615 | 0.01661  | 0.015039 |
|                                         | Gap junction                               | 0.000633 | 0.01661  | 0.015039 |
|                                         | Oocyte meiosis                             | 0.000777 | 0.018343 | 0.016608 |
|                                         | Amyotrophic lateral sclerosis              | 0.002227 | 0.047776 | 0.043258 |
| Treat45                                 | ECM-receptor interaction                   | 0.000336 | 0.040978 | 0.040306 |
| Treat46                                 | Signaling pathways regulating pluripotency | 0.000506 | 0.037352 | 0.036369 |
|                                         | TGF-beta signaling pathway                 | 0.000934 | 0.037352 | 0.036369 |
| Treat49                                 | Spliceosome                                | 2.12E-09 | 5.72E-08 | 5.35E-08 |
|                                         | RNA transport                              | 3.52E-07 | 4.75E-06 | 4.45E-06 |
| Treat51                                 | Complement and coagulation cascades        | 0.000101 | 0.017012 | 0.016734 |
|                                         | Ribosome                                   | 2.27E-07 | 4.10E-05 | 2.94E-05 |
|                                         | FoxO signaling pathway                     | 2.54E-07 | 4.10E-05 | 2.94E-05 |
|                                         | Renal cell carcinoma                       | 3.92E-07 | 4.23E-05 | 3.03E-05 |
|                                         | Ubiquitin mediated proteolysis             | 3.58E-06 | 0.000289 | 0.000207 |
|                                         | Coronavirus disease - COVID-19             | 4.88E-06 | 0.000315 | 0.000226 |
|                                         | Thermogenesis                              | 7.73E-06 | 0.000416 | 0.000298 |
|                                         | Colorectal cancer                          | 1.16E-05 | 0.000533 | 0.000382 |
|                                         | Adherens junction                          | 2.89E-05 | 0.001167 | 0.000837 |
|                                         | Cellular senescence                        | 3.76E-05 | 0.001326 | 0.000951 |
|                                         | Homologous recombination                   | 4.10E-05 | 0.001326 | 0.000951 |
|                                         | Chronic myeloid leukemia                   | 5.85E-05 | 0.001717 | 0.001231 |
|                                         | Longevity regulating pathway               | 7.70E-05 | 0.002072 | 0.001486 |
|                                         | Insulin signaling pathway                  | 8.76E-05 | 0.002176 | 0.00156  |
|                                         | Non-small cell lung cancer                 | 0.000112 | 0.002575 | 0.001846 |
|                                         | Endometrial cancer                         | 0.000146 | 0.003068 | 0.002199 |
|                                         | Pancreatic cancer                          | 0.000152 | 0.003068 | 0.002199 |
|                                         | Autophagy - animal                         | 0.00018  | 0.003411 | 0.002445 |
|                                         | mTOR signaling pathway                     | 0.00024  | 0.004308 | 0.003089 |
|                                         | EGFR tyrosine kinase inhibitor resistance  | 0.000365 | 0.006198 | 0.004444 |
|                                         | Thyroid hormone signaling pathway          | 0.000793 | 0.012216 | 0.008758 |
|                                         | Endocrine resistance                       | 0.000794 | 0.012216 | 0.008758 |
|                                         | Platinum drug resistance                   | 0.000917 | 0.013458 | 0.009649 |
|                                         | Thyroid cancer                             | 0.000968 | 0.0136   | 0.009751 |
|                                         | Sphingolipid signaling pathway             | 0.001036 | 0.013942 | 0.009996 |
|                                         | Bacterial invasion of epithelial cells     | 0.001141 | 0.014356 | 0.010292 |
|                                         | Non-alcoholic fatty liver disease          | 0.001156 | 0.014356 | 0.010292 |
|                                         | Prostate cancer                            | 0.001318 | 0.015212 | 0.010906 |
|                                         | Hepatocellular carcinoma                   | 0.001319 | 0.015212 | 0.010906 |
|                                         | Cell cycle                                 | 0.001427 | 0.01589  | 0.011392 |
|                                         | Human cytomegalovirus infection            | 0.001483 | 0.015966 | 0.011447 |
|                                         | Melanoma                                   | 0.001612 | 0.016003 | 0.011474 |
| Biosynthesis of unsaturated fatty acids | 0.001628                                   | 0.016003 | 0.011474 |          |

|                                           |                                             |          |          |          |
|-------------------------------------------|---------------------------------------------|----------|----------|----------|
| Treat53                                   | Choline metabolism in cancer                | 0.001635 | 0.016003 | 0.011474 |
|                                           | Inositol phosphate metabolism               | 0.00207  | 0.019661 | 0.014096 |
|                                           | Purine metabolism                           | 0.002293 | 0.021097 | 0.015126 |
|                                           | Apelin signaling pathway                    | 0.002351 | 0.021097 | 0.015126 |
|                                           | Human papillomavirus infection              | 0.002529 | 0.022074 | 0.015826 |
|                                           | Platelet activation                         | 0.002653 | 0.022555 | 0.016171 |
|                                           | VEGF signaling pathway                      | 0.003382 | 0.027846 | 0.019964 |
|                                           | Rap1 signaling pathway                      | 0.003473 | 0.027846 | 0.019964 |
|                                           | Signaling pathways regulating pluripotency  | 0.003568 | 0.027846 | 0.019964 |
|                                           | Growth hormone synthesis, secretion and ac  | 0.003664 | 0.027846 | 0.019964 |
|                                           | Small cell lung cancer                      | 0.003707 | 0.027846 | 0.019964 |
|                                           | Hippo signaling pathway - multiple species  | 0.00384  | 0.028188 | 0.02021  |
|                                           | Endocytosis                                 | 0.00404  | 0.028506 | 0.020438 |
|                                           | Bladder cancer                              | 0.00406  | 0.028506 | 0.020438 |
|                                           | AMPK signaling pathway                      | 0.004353 | 0.029917 | 0.02145  |
|                                           | Fatty acid metabolism                       | 0.004592 | 0.030898 | 0.022153 |
|                                           | Fanconi anemia pathway                      | 0.004806 | 0.031679 | 0.022713 |
|                                           | Phosphatidylinositol signaling system       | 0.005099 | 0.032938 | 0.023615 |
|                                           | MAPK signaling pathway                      | 0.005384 | 0.033369 | 0.023924 |
|                                           | TGF-beta signaling pathway                  | 0.005479 | 0.033369 | 0.023924 |
|                                           | Various types of N-glycan biosynthesis      | 0.005647 | 0.033369 | 0.023924 |
|                                           | Alzheimer disease                           | 0.005669 | 0.033369 | 0.023924 |
|                                           | Protein processing in endoplasmic reticulum | 0.005817 | 0.033369 | 0.023924 |
|                                           | Insulin resistance                          | 0.005869 | 0.033369 | 0.023924 |
|                                           | Huntington disease                          | 0.005892 | 0.033369 | 0.023924 |
|                                           | Hippo signaling pathway                     | 0.005992 | 0.033369 | 0.023924 |
|                                           | Mitophagy - animal                          | 0.006274 | 0.034346 | 0.024625 |
|                                           | Oxytocin signaling pathway                  | 0.00647  | 0.034828 | 0.024971 |
|                                           | Oxidative phosphorylation                   | 0.006605 | 0.034972 | 0.025074 |
|                                           | ErbB signaling pathway                      | 0.006789 | 0.035041 | 0.025123 |
|                                           | Glioma                                      | 0.006835 | 0.035041 | 0.025123 |
|                                           | Longevity regulating pathway - multiple spe | 0.007092 | 0.035792 | 0.025662 |
|                                           | RNA degradation                             | 0.007822 | 0.038434 | 0.027556 |
| Aldosterone-regulated sodium reabsorption | 0.007853                                    | 0.038434 | 0.027556 |          |
| N-Glycan biosynthesis                     | 0.008881                                    | 0.042815 | 0.030697 |          |
| Regulation of actin cytoskeleton          | 0.009106                                    | 0.043255 | 0.031012 |          |
| Nucleotide excision repair                | 0.009337                                    | 0.04371  | 0.031338 |          |
| Long-term depression                      | 0.009482                                    | 0.043754 | 0.03137  |          |
| Ovarian steroidogenesis                   | 0.00018                                     | 0.011725 | 0.007785 |          |
| Treat54                                   | Glycerophospholipid metabolism              | 0.001234 | 0.029508 | 0.019592 |
|                                           | alpha-Linolenic acid metabolism             | 0.001362 | 0.029508 | 0.019592 |
|                                           | Linoleic acid metabolism                    | 0.001833 | 0.029793 | 0.019782 |
|                                           | Cell cycle                                  | 1.74E-09 | 5.46E-07 | 4.74E-07 |
|                                           | DNA replication                             | 1.28E-08 | 2.00E-06 | 1.74E-06 |
| Treat56                                   | p53 signaling pathway                       | 3.60E-07 | 3.76E-05 | 3.26E-05 |
|                                           | Cysteine and methionine metabolism          | 0.00021  | 0.014147 | 0.012275 |
|                                           | Colorectal cancer                           | 0.000256 | 0.014147 | 0.012275 |
|                                           | Cellular senescence                         | 0.000271 | 0.014147 | 0.012275 |
|                                           | Mismatch repair                             | 0.00037  | 0.016565 | 0.014373 |
|                                           | Prostate cancer                             | 0.000961 | 0.037581 | 0.032607 |
|                                           | Complement and coagulation cascades         | 3.19E-08 | 7.59E-06 | 6.84E-06 |
|                                           | Bile secretion                              | 2.46E-05 | 0.002932 | 0.002645 |

|         |                                            |          |          |          |
|---------|--------------------------------------------|----------|----------|----------|
| Treat58 | Retinol metabolism                         | 0.000108 | 0.0086   | 0.00776  |
|         | Metabolism of xenobiotics by cytochrome F  | 0.000286 | 0.01699  | 0.01533  |
|         | Chemical carcinogenesis                    | 0.000438 | 0.02084  | 0.018803 |
|         | Tyrosine metabolism                        | 0.001032 | 0.040939 | 0.036938 |
| Treat59 | Steroid biosynthesis                       | 4.36E-09 | 1.20E-06 | 1.14E-06 |
|         | Terpenoid backbone biosynthesis            | 3.99E-06 | 0.00055  | 0.00052  |
|         | Complement and coagulation cascades        | 1.55E-08 | 3.80E-06 | 3.48E-06 |
|         | Chemical carcinogenesis                    | 0.000188 | 0.014973 | 0.013711 |
| Treat60 | Tyrosine metabolism                        | 0.000217 | 0.014973 | 0.013711 |
|         | Retinol metabolism                         | 0.000243 | 0.014973 | 0.013711 |
|         | Metabolism of xenobiotics by cytochrome F  | 0.000626 | 0.030806 | 0.028209 |
|         | Complement and coagulation cascades        | 1.02E-12 | 3.00E-10 | 2.60E-10 |
| Treat63 | NF-kappa B signaling pathway               | 2.22E-06 | 0.000224 | 0.000194 |
|         | Retinol metabolism                         | 2.29E-06 | 0.000224 | 0.000194 |
|         | ECM-receptor interaction                   | 1.50E-05 | 0.001102 | 0.000954 |
|         | Amoebiasis                                 | 9.80E-05 | 0.005298 | 0.00459  |
|         | Axon guidance                              | 0.000108 | 0.005298 | 0.00459  |
|         | Focal adhesion                             | 0.000188 | 0.007883 | 0.00683  |
|         | AGE-RAGE signaling pathway in diabetic c   | 0.000268 | 0.008806 | 0.00763  |
|         | Bile secretion                             | 0.00029  | 0.008806 | 0.00763  |
|         | TNF signaling pathway                      | 0.0003   | 0.008806 | 0.00763  |
|         | Tyrosine metabolism                        | 0.000524 | 0.014001 | 0.012131 |
|         | Metabolism of xenobiotics by cytochrome F  | 0.000859 | 0.021041 | 0.018231 |
|         | IL-17 signaling pathway                    | 0.001471 | 0.029436 | 0.025505 |
|         | Drug metabolism - cytochrome P450          | 0.001482 | 0.029436 | 0.025505 |
|         | Chemical carcinogenesis                    | 0.001502 | 0.029436 | 0.025505 |
|         | Maturity onset diabetes of the young       | 0.002145 | 0.038564 | 0.033414 |
|         | MAPK signaling pathway                     | 0.00223  | 0.038564 | 0.033414 |
|         | Arrhythmogenic right ventricular cardiomyo | 0.002574 | 0.042045 | 0.03643  |
|         | Fluid shear stress and atherosclerosis     | 0.003142 | 0.04862  | 0.042127 |
|         | Protein digestion and absorption           | 0.003372 | 0.04957  | 0.04295  |
| Treat65 | Retinol metabolism                         | 0.000314 | 0.045002 | 0.04407  |
|         | Cysteine and methionine metabolism         | 0.000369 | 0.045002 | 0.04407  |
| Treat67 | Non-alcoholic fatty liver disease          | 0.000484 | 0.011618 | 0.006624 |
| Treat69 | Steroid biosynthesis                       | 1.59E-10 | 5.41E-09 | 4.36E-09 |
|         | Terpenoid backbone biosynthesis            | 5.50E-08 | 9.35E-07 | 7.52E-07 |
| Treat72 | Signaling pathways regulating pluripotency | 0.000161 | 0.009973 | 0.008804 |
|         | TGF-beta signaling pathway                 | 0.000372 | 0.011538 | 0.010186 |
| Treat73 | TGF-beta signaling pathway                 | 0.000505 | 0.012613 | 0.010622 |
|         | Signaling pathways regulating pluripotency | 0.001708 | 0.021352 | 0.017981 |
| Treat74 | Aminoacyl-tRNA biosynthesis                | 4.49E-05 | 0.004262 | 0.003967 |
|         | Steroid biosynthesis                       | 1.49E-09 | 1.62E-07 | 1.41E-07 |
| Treat75 | Terpenoid backbone biosynthesis            | 8.71E-06 | 0.000475 | 0.000413 |
|         | Aminoacyl-tRNA biosynthesis                | 0.000703 | 0.025541 | 0.022198 |
|         | RNA transport                              | 1.13E-07 | 3.15E-06 | 4.74E-07 |
|         | Spliceosome                                | 1.51E-06 | 2.12E-05 | 3.19E-06 |
|         | Glycerophospholipid metabolism             | 0.000351 | 0.002455 | 0.000369 |
|         | Choline metabolism in cancer               | 0.000351 | 0.002455 | 0.000369 |
|         | alpha-Linolenic acid metabolism            | 0.000594 | 0.003328 | 0.0005   |
|         | Linoleic acid metabolism                   | 0.000802 | 0.00374  | 0.000562 |
|         | Ether lipid metabolism                     | 0.002284 | 0.008651 | 0.001301 |
|         | Ovarian steroidogenesis                    | 0.002472 | 0.008651 | 0.001301 |



|         |                                            |          |          |          |
|---------|--------------------------------------------|----------|----------|----------|
|         | VEGF signaling pathway                     | 0.003295 | 0.008957 | 0.001347 |
|         | Long-term depression                       | 0.003406 | 0.008957 | 0.001347 |
|         | Arachidonic acid metabolism                | 0.003519 | 0.008957 | 0.001347 |
| Treat78 | Fc epsilon RI signaling pathway            | 0.004355 | 0.010161 | 0.001528 |
|         | GnRH signaling pathway                     | 0.008011 | 0.016547 | 0.002488 |
|         | Fc gamma R-mediated phagocytosis           | 0.008691 | 0.016547 | 0.002488 |
|         | Inflammatory mediator regulation of TRP cl | 0.008864 | 0.016547 | 0.002488 |
|         | Glutamatergic synapse                      | 0.011855 | 0.019855 | 0.002986 |
|         | Serotonergic synapse                       | 0.012055 | 0.019855 | 0.002986 |
|         | Platelet activation                        | 0.013921 | 0.021655 | 0.003256 |
|         | Vascular smooth muscle contraction         | 0.015906 | 0.02344  | 0.003525 |
|         | Phospholipase D signaling pathway          | 0.019469 | 0.027257 | 0.004099 |
|         | Oxytocin signaling pathway                 | 0.020981 | 0.027975 | 0.004207 |
|         | Necroptosis                                | 0.022279 | 0.028355 | 0.004264 |
|         | Nitrogen metabolism                        | 0.024953 | 0.030377 | 0.004568 |
| Treat81 | Signaling pathways regulating pluripotency | 2.81E-05 | 0.000674 | 0.000562 |
|         | TGF-beta signaling pathway                 | 0.000235 | 0.002815 | 0.002346 |
|         | Biosynthesis of amino acids                | 1.55E-06 | 0.000154 | 0.00015  |
| Treat83 | Cysteine and methionine metabolism         | 4.12E-06 | 0.000204 | 0.000199 |
|         | Glycine, serine and threonine metabolism   | 4.12E-05 | 0.001361 | 0.001332 |
|         | Steroid biosynthesis                       | 0.000683 | 0.016271 | 0.013175 |
| Treat85 | Aldosterone synthesis and secretion        | 0.000862 | 0.016271 | 0.013175 |
|         | Biosynthesis of unsaturated fatty acids    | 0.001252 | 0.016271 | 0.013175 |
| Treat88 | Steroid hormone biosynthesis               | 0.000425 | 0.02082  | 0.019232 |
| Treat90 | Complement and coagulation cascades        | 3.99E-09 | 1.06E-06 | 1.02E-06 |
|         | Tyrosine metabolism                        | 8.68E-05 | 0.011547 | 0.011058 |
|         | Complement and coagulation cascades        | 2.10E-08 | 6.48E-06 | 5.92E-06 |
| Treat91 | Retinol metabolism                         | 3.45E-06 | 0.000534 | 0.000487 |
|         | NF-kappa B signaling pathway               | 5.12E-05 | 0.005272 | 0.004813 |
|         | Maturity onset diabetes of the young       | 0.000637 | 0.04923  | 0.044945 |
| Treat92 | Steroid biosynthesis                       | 2.12E-05 | 0.00261  | 0.002501 |
| Treat2  | No pathway                                 |          |          |          |
| Treat4  | No pathway                                 |          |          |          |
| Treat5  | No pathway                                 |          |          |          |
| Treat7  | No pathway                                 |          |          |          |
| Treat9  | No pathway                                 |          |          |          |
| Treat10 | No pathway                                 |          |          |          |
| Treat12 | No pathway                                 |          |          |          |
| Treat13 | No pathway                                 |          |          |          |
| Treat15 | No pathway                                 |          |          |          |
| Treat17 | No pathway                                 |          |          |          |
| Treat18 | No pathway                                 |          |          |          |
| Treat19 | No pathway                                 |          |          |          |
| Treat20 | No pathway                                 |          |          |          |
| Treat24 | No pathway                                 |          |          |          |
| Treat28 | No pathway                                 |          |          |          |
| Treat30 | No pathway                                 |          |          |          |
| Treat31 | No pathway                                 |          |          |          |
| Treat34 | No pathway                                 |          |          |          |
| Treat37 | No pathway                                 |          |          |          |
| Treat38 | No pathway                                 |          |          |          |

|         |            |
|---------|------------|
| Treat41 | No pathway |
| Treat42 | No pathway |
| Treat47 | No pathway |
| Treat48 | No pathway |
| Treat50 | No pathway |
| Treat52 | No pathway |
| Treat55 | No pathway |
| Treat57 | No pathway |
| Treat61 | No pathway |
| Treat62 | No pathway |
| Treat64 | No pathway |
| Treat66 | No pathway |
| Treat68 | No pathway |
| Treat70 | No pathway |
| Treat71 | No pathway |
| Treat76 | No pathway |
| Treat77 | No pathway |
| Treat79 | No pathway |
| Treat80 | No pathway |
| Treat82 | No pathway |
| Treat84 | No pathway |
| Treat86 | No pathway |
| Treat87 | No pathway |
| Treat89 | No pathway |

Supplemental Table 6 The efficacy and representative compounds of samples

| Groups | Sample name                     | Representative compounds                                                                                                                                                                                                                                                                                                | Efficacy                                                                                                                                                                                                                                                                      | Pharmaceutical effect                           |
|--------|---------------------------------|-------------------------------------------------------------------------------------------------------------------------------------------------------------------------------------------------------------------------------------------------------------------------------------------------------------------------|-------------------------------------------------------------------------------------------------------------------------------------------------------------------------------------------------------------------------------------------------------------------------------|-------------------------------------------------|
| Group1 | <i>Ageratina adenophora</i>     | Benzofuran derivatives (7-hydroxy-dehydrotremetone, 7,1-,11-trihydroxy dehydrotremetone, 1--oxo-7-hydroxy-nordehydrotremetone), a previously undescribed chromene derivative (5- $\beta$ -glucosyl-7-demethoxy-enecalinal) and a previously undescribed monoterpene glucoside (8-hydroxy-8- $\beta$ -glucosyl-2-carene) | Antifungal activity: 7-hydroxy-dehydrotremetone showed significant broad-spectral inhibitory activity against the growth of fungal. Phytotoxic effects: inhibit Arabidopsis seed germination                                                                                  | Promoting blood circulation and removing stasis |
| Group1 | <i>Gynura procumbens</i>        | Flavonoids and glycosides, steroids, phenolics, kaempferol, quercetin, astragalinal, chlorogenic acid, kaempferol, kaempferol- 3, 7-di-O- $\beta$ -D- glucoside, Glycoconjugates– and peptides, Essential–oils, titerpenes/steroid, bitter principles, quercetin                                                        | Exhibit antihypertensive, cardioprotective, antihyperglycemic, fertility enhancement, anticancer, antimicrobial, antioxidant, organ protective, and antiinflammatory activity. Treatment of kidney discomfort, rheumatism, diabetes mellitus, constipation, and hypertension. | Promoting blood circulation and removing stasis |
| Group1 | <i>Kadsura coccinea</i>         | Flavonol (quercetin), flavanone (naringenin), anthocyanidins (cyanidin and delphinidin), and anthocyanins (cyanidin 3-O-glucoside (kuromanin), cyanidin 3-O-galactoside (ideain), cyanidin 3-O-rutinoside (keracyanin), and cyanidin 3,5-di-O-glucoside (cyanin)), phenolic, quinic acid, lignan.                       | High antioxidant activities and key enzyme inhibitions, anti-oxidative agents against diabetes and Alzheimer's disease,                                                                                                                                                       | Promoting blood circulation and removing stasis |
| Group1 | <i>Panax japonica</i> var major | Terpenoid, Ginsenoside Rg1, Rb1, Rc, Rd and Re, and notoginsenosideR2, Majonoside R2, Ginsenoside Ro, Chikusetsusaponin IV, Chikusetsusaponin Iva, flavonoid.                                                                                                                                                           | Nourish lung-yin, dissolve stasis, relieve pain and staunch bleeding. The representative chemical compounds effect on verious cancers.                                                                                                                                        | Promoting blood circulation and removing stasis |
| Group1 | <i>Panax notoginseng</i>        | Ginsenoside Rg1, Rb1, Rd and Re, and notoginsenoside R1,R2, scoposide E, quercetin                                                                                                                                                                                                                                      | Dissolve stasis, stop bleeding and alleviate swelling and pain. The representative chemical compounds effect on verious cancers.                                                                                                                                              | Promoting blood circulation and removing stasis |



|        |                                                                     |                                                                                                                                                                                                                                                                                                                                                                             |                                                                                                                                                                                                                                             |                                                 |
|--------|---------------------------------------------------------------------|-----------------------------------------------------------------------------------------------------------------------------------------------------------------------------------------------------------------------------------------------------------------------------------------------------------------------------------------------------------------------------|---------------------------------------------------------------------------------------------------------------------------------------------------------------------------------------------------------------------------------------------|-------------------------------------------------|
| Group1 | <i>Panax stipuleanatus</i>                                          | Qleanane-type triterpenoid, stipuleanosides R1 and R2, oleanolic acid                                                                                                                                                                                                                                                                                                       | Tonic and bruises, bleeding, muscular pain treatment, anti-cancer. Oleanane-triterpenoids from <i>Panax stipuleanatus</i> inhibit NF-κB(NF-κB has been the target of several anti-inflammatory and anti-cancer drugs).                      | Promoting blood circulation and removing stasis |
| Group1 | <i>Panax vietnamensis</i>                                           | similar to <i>Panax ginseng</i> , contain protopanaxadiol and protopanaxatriol-type saponins, such as G-Rb1, -Rd, -Rg1, and -Re; ocotillol-type saponins; panaxynol,                                                                                                                                                                                                        | Central nervous system against stress, depression, and anxiety, antitumor and hepatoprotective effects                                                                                                                                      | Promoting blood circulation and removing stasis |
| Group1 | <i>Phyllanthus reticulatus</i> Poir. var. <i>glaber</i> Muell.-Age. | The stem and leaf may contain polypeptides, sugars, tannins, organic acids, flavonoids, phenols, coumarins and lactones, steroids or triterpenoids, volatile oils and oils; the leaf may also contain anthraquinones, and the stem may also contain saponins and cardiac glycosides. Epigallocatechin-3-gallate (EGCG) and Gallic acid is the main component of anti-tumor. | Rheumatism treatment, activating blood circulation, dispersing blood stasis and detumescence                                                                                                                                                | Promoting blood circulation and removing stasis |
| Group1 | <i>Salvia miltiorrhiza</i>                                          | Diterpenoid quinones, hydrophilic phenolic acids, and essential oils.                                                                                                                                                                                                                                                                                                       | Toronary heart diseases and cerebrovascular diseases treatment. Possess cardiovascular and cerebrovascular effects, and the antioxidative, neuroprotective, antifibrotic, anti-inflammatory, and antineoplastic activities                  | Promoting blood circulation and removing stasis |
| Group1 | <i>Smilax scobinicaulis</i> C. H. Wright                            | Undescribed                                                                                                                                                                                                                                                                                                                                                                 | Undescribed                                                                                                                                                                                                                                 | Promoting blood circulation and removing stasis |
| Group2 | <i>Abutilon indicum</i>                                             | Undescribed                                                                                                                                                                                                                                                                                                                                                                 | Anti-inflammatory agent. Treatment of jaundice, piles, ulcer and leprosy, blood dysentery, fever and allergy and as an aphrodisiac. Possess analgesic, hepatoprotective, antifertility properties, antibacterial and antifungal activities. | Heat-Clearing                                   |

|        |                             |                                                                                                                                                                                                                                                                                                                                                          |                                                                                                                                                                                                                                                                                                                                                                                                                                                                                         |               |
|--------|-----------------------------|----------------------------------------------------------------------------------------------------------------------------------------------------------------------------------------------------------------------------------------------------------------------------------------------------------------------------------------------------------|-----------------------------------------------------------------------------------------------------------------------------------------------------------------------------------------------------------------------------------------------------------------------------------------------------------------------------------------------------------------------------------------------------------------------------------------------------------------------------------------|---------------|
| Group2 | <i>Amaranthus tricolor</i>  | Beta-cyanins, saponins, alkaloids, phenolics, and oxalates, vitamin C and A. Vitamin B6, riboflavin and foliate.                                                                                                                                                                                                                                         | Rich antioxidant property, isoproterenol-induced oxidative stress, fibrosis, and myocardial damage. Treating diarrhea, dysentery, menorrhagia, hemorrhagic colitis, bowel hemorrhages, cough and bronchitis, with anti-tumor effect, anti-ulcer activity, hepatoprotective activity and against external inflammations and also used as a treatment in bladder distress, effective against liver cancer cell line (HepG2), breast cancer cell line (MCF-7), and colon cancer cell line. | Heat-Clearing |
| Group2 | <i>Argyrea pierreana</i>    | Undescribed                                                                                                                                                                                                                                                                                                                                              | Undescribed                                                                                                                                                                                                                                                                                                                                                                                                                                                                             | Heat-Clearing |
| Group2 | <i>Artemisia lactiflora</i> | 7-hydroxycoumarin, 7-methoxycoumarin, balanophonin, aurantiamide, aurantiamide acetate, isovitexin, kaempferol-3-O-beta-D-rutinoside, rutin, caffeic acid ethyl ester, quercetin, methyl 3, 5-di-O-caffeoyl quinate and methyl 3, 4-di-O-caffeoyl quinate                                                                                                | -                                                                                                                                                                                                                                                                                                                                                                                                                                                                                       | Heat-Clearing |
| Group2 | <i>Chenopodium album</i>    | Fatty Acids(Caprylic acid, Lauric acid, Myristic acid, Pentadecanoic acid, Tetradecanoic acid, 5,9,13-trimethyl- Palmitelaidic acid, Palmitic acid, Oleic acid, Margaric acid, Isooleic acid, Stearic acid, Arachidic acid, Behenic acid, Tricosylic acid); Terpenes(Dihydroactinidiolide, Neophytadiene); Phytosterols( $\beta$ -sitosterol), quercetin | Anti-inflammatory, anti-arthritic, antioxidant, antihelmintic, laxative, as a blood purifier, antirheumatic remedy, treatment of hepatic disorders, intestinal ulcers, burns, rheumatism and arthritis                                                                                                                                                                                                                                                                                  | Heat-Clearing |
| Group2 | <i>Dalbergia pinnata</i>    | Quinone volatile oil, flavonoids, coumarins, terpenoids, phenols and other chemical components                                                                                                                                                                                                                                                           | Treating arthritis, gonorrhea and rheumatic pains, antioxidant, anti-microbial, anti-androgenic, anti-inflammatory, anti-depressant, and enzyme inhibition properties.                                                                                                                                                                                                                                                                                                                  | Heat-Clearing |

|        |                                              |                                                                                                                                                                                                                                                                                                                                                                                                                                                                            |                                                                                                                                                                                                                                       |               |
|--------|----------------------------------------------|----------------------------------------------------------------------------------------------------------------------------------------------------------------------------------------------------------------------------------------------------------------------------------------------------------------------------------------------------------------------------------------------------------------------------------------------------------------------------|---------------------------------------------------------------------------------------------------------------------------------------------------------------------------------------------------------------------------------------|---------------|
| Group2 | <i>Euphorbia hirta</i>                       | Triterpenes(2a, 2b, 3a, 3b, 3c, 3d,4a-4d), taraxerol, phytol, phytyl fatty acid esters, linoleic acid, $\beta$ -sitosterol and squalene, Epigallocatechin-3-gallate (EGCG) is the main component of anti-tumor.                                                                                                                                                                                                                                                            | Antimicrobial activities, wound healing and the treatment of boils, triterpenes 2a and 2b contribute to the anticancer activity. <i>E. hirta</i> could be used as an apoptosis-inducing anticancer agent for breast cancer treatment. | Heat-Clearing |
| Group2 | <i>Forsythia suspensa</i>                    | Lignans and phenylethanoid glycosides are considered as the characteristic and active constituents of this herb, such as forsythiaside, phillyrin, rutin and phillygenin, terpenoid, flavonoid. Compared to Laoqiao, Qingqiao contains higher levels of forsythiaside, forsythoside C, comoside, rutin, phillyrin, gallic acid and chlorogenic acid and lower levels of rengyol, $\beta$ -glucose and S-suspensaside methyl ether. Arctigenin is the anti-cancer compound. | Exhibited anti-inflammatory, antioxidant, antibacterial, anti-virus, anti-cancer, anti-allergy effects, heat-clearing and detoxifying, etc, treat pyrexia, inflammation, gonorrhea, carbuncle and erysipelas.                         | Heat-Clearing |
| Group2 | <i>Kummerowia striata</i>                    | P-coumaric acid and quercetin                                                                                                                                                                                                                                                                                                                                                                                                                                              | Inflammation-related therapy, anti-melanogenic activity, anti-oxidant,                                                                                                                                                                | Heat-Clearing |
| Group2 | <i>Mallotus apelta</i>                       | Coumarins, benzopyrans, flavonoids, diterpenoids, triterpenoids, steroids, alkaloids, chromene derivatives, malloapeltas C-H (1-6) and malloapelta B.                                                                                                                                                                                                                                                                                                                      | Antiviral, hepatoprotective, and cytotoxic activities, treating cancer via modulating NF- $\kappa$ B activity.                                                                                                                        | Heat-Clearing |
| Group2 | <i>Malva verticillata</i> var. <i>crispa</i> | Undescribed                                                                                                                                                                                                                                                                                                                                                                                                                                                                | Undescribed                                                                                                                                                                                                                           | Heat-Clearing |

|        |                                               |                                                                                                                                                                                                                            |                                                                                                                                                                                                                                                                                                                                                                                                                                                                                                                                 |               |
|--------|-----------------------------------------------|----------------------------------------------------------------------------------------------------------------------------------------------------------------------------------------------------------------------------|---------------------------------------------------------------------------------------------------------------------------------------------------------------------------------------------------------------------------------------------------------------------------------------------------------------------------------------------------------------------------------------------------------------------------------------------------------------------------------------------------------------------------------|---------------|
| Group2 | <i>Malvastrum coromandelianum</i>             | Steroidal saponins, saponin, diosgenin, gitogenin type steroidal saponin                                                                                                                                                   | Anti-diabetic, anti-inflammatory, anti-bacterial and analgesic activities, steroidal saponins stimulate lymphocyte proliferation and inhibit inflammatory cytokine production by activated macrophage. Saponin and diosgenin relieve goiter <sup>4</sup> and has protective effects on hyperlipidemic rats. Gitogenin type steroidal saponin inhibited thyroid function through the suppression of the gene transcription and expression of some proliferation-associated proteins, may be serve as a potent anti-thyroid drug. | Heat-Clearing |
| Group2 | <i>Melia azedarach</i>                        | Sterols and terpenoids(triterpenoids), limonoids, benzyl 3-O-β-D-glucopyranosyl-7-hydroxybenzoate, spathulenol, 1,7,8-trihydroxy-2-naphthaldehyde, quercetin, astragalol and 2-methoxy-4-(2-propenyl)phenyl β-D-glucoside. | Antidiabetic, cytotoxic, antibacterial, anti-oxidant activities, anti-fungal, antifeedant                                                                                                                                                                                                                                                                                                                                                                                                                                       | Heat-Clearing |
| Group2 | <i>Paeonia anomala</i> subsp. <i>veitchii</i> | Monoterpene glycosides, tannins, phenols, paeonol and flavonoid                                                                                                                                                            | Anti-inflammatory, immunomodulatory, antitumor, antiviral, antibacterial, antifungal, antioxidant, hepatoprotective and neuroprotective effects Treatment of ancient internal, surgical, and gynecological diseases, has pharmacological activities such as anti-inflammatory, anti-bacterial, antiviral, anti-liver fibrosis, antitussive and expectorant, anti-tumor, anti-oxidation, and so on.                                                                                                                              | Heat-Clearing |
| Group2 | <i>Polygonum perfoliatum</i>                  | Flavonoids, anthraquinones, terpenoids, phenolic acids, quercetin, phenylpropanoids, and alkaloids,                                                                                                                        | Anti-inflammatory, anti-bacterial, antiviral, anti-liver fibrosis, antitussive and expectorant, anti-tumor, anti-oxidation, and so on.                                                                                                                                                                                                                                                                                                                                                                                          | Heat-Clearing |

|        |                                   |                                                                                                                                                                                                           |                                                                                                                                                                                                                                                                                                                                                                                                                                                                                                                                                                                                                                  |               |
|--------|-----------------------------------|-----------------------------------------------------------------------------------------------------------------------------------------------------------------------------------------------------------|----------------------------------------------------------------------------------------------------------------------------------------------------------------------------------------------------------------------------------------------------------------------------------------------------------------------------------------------------------------------------------------------------------------------------------------------------------------------------------------------------------------------------------------------------------------------------------------------------------------------------------|---------------|
| Group2 | <i>Scutellaria baicalensis</i>    | Flavonoid, free flavonoids, flavonoid glycosides, phenylethanoid glycosides, steroids, diterpene, amides, phenolic.                                                                                       | Clearing heat, eliminating dampness, purging fire, detoxification, hemostasis, and preventing miscarriage, with anti-tumor, anti-viral, anti-microbial, anti-inflammatory, antioxidative, neuroprotective and hepatoprotective activities, widely used for the treatment of influenza, pneumonia, dysentery, cancer(liver cancer, gastric cancer, lung cancer, breast cancer, prostate cancer, bladder cancer, brain cancer, squamous cell carcinoma, mucoepidermoid carcinoma, colorectal cancer, gallbladder carcinoma, oral cancer, leukemia, lymphoma, and myeloma), cardiovascular and cerebrovascular diseases, and bones. | Heat-Clearing |
| Group2 | <i>Senecio scandens</i>           | Flavonoids, alkaloids, phenolic acids, terpenes, volatile oils, quercetin, hyperin, carotenoids, and trace element, PAs are the characteristic constituents, adonifoline is one of the index ingredients. | anti-inflammatory, antimicrobial, anti-leptospirosis, hepatoprotective, anti-infusorial, antioxidant, antiviral, antitumoral, analgesic, mutagenic, and toxicological                                                                                                                                                                                                                                                                                                                                                                                                                                                            | Heat-Clearing |
| Group2 | <i>Sphagneticola calendulacea</i> | Flavonoids, diterpenes, triterpenes, saponins and phytosterols                                                                                                                                            | Clearing away heat and toxin, cooling blood and dispersing blood stasis.                                                                                                                                                                                                                                                                                                                                                                                                                                                                                                                                                         | Heat-Clearing |
| Group2 | <i>Swertia leduicii</i>           | Sweriledugenin A, flavonoid, oleanolic acid                                                                                                                                                               | Inhibiting HBV DNA replication                                                                                                                                                                                                                                                                                                                                                                                                                                                                                                                                                                                                   | Heat-Clearing |
| Group2 | <i>Tabernaemontana divaricata</i> | Monoterpenoid indole alkaloids, ibogaine                                                                                                                                                                  | Ibogaine could reduce organ colonization and thus beneficial for treatment of gastrointestinal <i>C. albicans</i> infections, alkaloids with significant antifungal activity.                                                                                                                                                                                                                                                                                                                                                                                                                                                    | Heat-Clearing |

|        |                                         |                                                                                                                                                                                                                                                                     |                                                                                                                                                                                                                                                                                                                                                                                                                                                                                                                                                             |                      |
|--------|-----------------------------------------|---------------------------------------------------------------------------------------------------------------------------------------------------------------------------------------------------------------------------------------------------------------------|-------------------------------------------------------------------------------------------------------------------------------------------------------------------------------------------------------------------------------------------------------------------------------------------------------------------------------------------------------------------------------------------------------------------------------------------------------------------------------------------------------------------------------------------------------------|----------------------|
| Group3 | <i>Breynia fruticosa</i>                | Zizyberanolic acid, isoceanothic acid, ursolic acid, tannins, triterpenes, sterol derivatives, flavonoid, lignins, thiacremonone, phenols, amino acid, steroid, sesquiterpenoids (breynins). Epigallocatechin-3-gallate (EGCG) is the main component of anti-tumor. | Treating gastroenteritis, sore throat, chronic bronchitis, wounds, with effect of anti-cancer, anti-arthritis, anti-inflammatory. Zizyberanolic acid and isoceanothic acid were revealed possess cytotoxic activity against five human cancer cell lines, including breast cancer MCF-7; sesquiterpenoids (breynins) have strong anti-arthritis activities and is responsible to the anti-inflammatory effects; thiacremonone reduces inflammation with the mechanism of inhibition of NF- $\kappa$ B DNA binding activity and expression of iNOS and COX-2 | Rheumatism treatment |
| Group3 | <i>Excoecaria cochinchinensis</i> Lour. | Oxygenated diterpenoids(named excolabdone D), loliolide, megastigmane glucosides, flavonoids, triterpenoids, sterols, phenolic, ursolic acid, amino acid, tannin. Epigallocatechin-3-gallate (EGCG) is the main component of anti-tumor.                            | Treating cancer, malaria, dysentery, furuncles, pruritus, prolonged diarrhoea, and urethrorrhagia, anti-inflammatory, inhibit HIV-1.                                                                                                                                                                                                                                                                                                                                                                                                                        | Rheumatism treatment |
| Group3 | <i>Excoecaria cochinchinensis</i> Lour. | Oxygenated diterpenoids(named excolabdone D), loliolide, megastigmane glucosides, flavonoids, triterpenoids, sterols, phenolic, ursolic acid, amino acid, tannin. Epigallocatechin-3-gallate (EGCG) is the main component of anti-tumor.                            | Treating cancer, malaria, dysentery, furuncles, pruritus, prolonged diarrhoea, and urethrorrhagia, anti-inflammatory, inhibit HIV-1.                                                                                                                                                                                                                                                                                                                                                                                                                        | Rheumatism treatment |
| Group3 | <i>Mucuna macrocarpa</i>                | phenolics(tannic acid, gallic acid, and p-coumaric acid), flavonoids                                                                                                                                                                                                | Antioxidant, treating cancer, inflammatory disease, cardiovascular disorders, hypertension, hypercholesterolemia, and diabetes.                                                                                                                                                                                                                                                                                                                                                                                                                             | Rheumatism treatment |
| Group3 | <i>Pinus massoniana</i> Lamb.           | Volatile oil, lignans, flavonoids, shikimate, proanthocyanidins and their derivatives. Epigallocatechin-3-gallate (EGCG) is the main component of anti-tumor.                                                                                                       | Antioxidant, antibacterial, cardiovascular protection, lipid regulation, antitumour, anti-HBV, anti-HCV                                                                                                                                                                                                                                                                                                                                                                                                                                                     | Rheumatism treatment |

|        |                                                   |                                                                                                                                                                                                                                                                                                                                                                                                                                                                                                                                                                                                         |                                                                                                                                                                                                                                                                                                        |                      |
|--------|---------------------------------------------------|---------------------------------------------------------------------------------------------------------------------------------------------------------------------------------------------------------------------------------------------------------------------------------------------------------------------------------------------------------------------------------------------------------------------------------------------------------------------------------------------------------------------------------------------------------------------------------------------------------|--------------------------------------------------------------------------------------------------------------------------------------------------------------------------------------------------------------------------------------------------------------------------------------------------------|----------------------|
| Group3 | <i>Trachelospermum jasminoides</i>                | Arctigenin, alkaloids, $\beta$ -vanillin, $\beta$ -vanillin acetate, lupeol, lupeol acetate, lupeol unsaturated fatty acid ester, $\beta$ -sitosterol, stigmasterol and rapeseed oil sterol.                                                                                                                                                                                                                                                                                                                                                                                                            | Treatment for musculoskeletal soreness caused by chronic strain, osteoarthritis and osteoporosis, with bone-strengthening and anti-osteoclastogenic effect, inhibits T osteoclast differentiation through the NF- $\kappa$ B, MAPK and AKT signaling pathways. Arctigenin is the anti-cancer compound. | Rheumatism treatment |
| Group4 | <i>Blumea riparia</i>                             | Undescribed monoterpenes, sesquiterpenes hydrocarbons, alkaloids and flavonoids(salvigenin, sakuranetin, isosakuranetin, kaempferide, betulenol, 2-5-7-3 tetra-o-methyl quercetagenin, tamarixetin, two chalcones and odoratin and its alcoholic compound), essential oils (geyren, bornyl acetate and $\beta$ -eubeden), saponin triterpenoids, tannins, organic acids and numerous trace substances, phenolic acids (protocatechuic, p-hydroxybenzoic, p-coumaric, ferulic and vanillic acids) and complex mixtures of lipophilic flavonoid aglycones (flavanones, flavonols, flavones and chalcones) | Undescribed                                                                                                                                                                                                                                                                                            | Hemostatic           |
| Group4 | <i>Chromolaena odorata</i>                        |                                                                                                                                                                                                                                                                                                                                                                                                                                                                                                                                                                                                         | Anti-inflammatory, antipyretic, analgesic, antimicrobial, cytotoxic and numerous other relevant medicinal properties on an appreciable scale, and treat various ailments.                                                                                                                              | Hemostatic           |
| Group4 | <i>Panax zingiberensis</i> C. Y. Wu et K. M. Feng | Terpenoid, Ginsenoside Rb1, Ginsenoside Rg1, Ginsenoside Rd Notoginsenoside R2, Ginsenoside Ro, Chikusetsusaponin IV                                                                                                                                                                                                                                                                                                                                                                                                                                                                                    | Dissolve stasis, stop bleeding and alleviate pain. The representative chemical compounds effect on various cancers.                                                                                                                                                                                    | Hemostatic           |
| Group4 | <i>Phyllodium elegans</i>                         | Polyphenols(Quinic acid, Gallic acid, Homogentisic acid, Protocatechuic acid, Epigallocatechin or Gallocatechin and 4-Hydroxybenzoic acid so on )                                                                                                                                                                                                                                                                                                                                                                                                                                                       | Anti-cancer properties and cytotoxicity on brain astrogloma cells (U251-MG), colorectal carcinoma cells (HCT116), and malignant melanoma cells                                                                                                                                                         | Hemostatic           |

|        |                                |                                                                                                                                                                                                                                                                                                                              |                                                                                                                                                                                                                                                                                                                                                                                                                                                                                                                                                                                                                                                                                                                                                                                                                                                                                                                                                                            |            |
|--------|--------------------------------|------------------------------------------------------------------------------------------------------------------------------------------------------------------------------------------------------------------------------------------------------------------------------------------------------------------------------|----------------------------------------------------------------------------------------------------------------------------------------------------------------------------------------------------------------------------------------------------------------------------------------------------------------------------------------------------------------------------------------------------------------------------------------------------------------------------------------------------------------------------------------------------------------------------------------------------------------------------------------------------------------------------------------------------------------------------------------------------------------------------------------------------------------------------------------------------------------------------------------------------------------------------------------------------------------------------|------------|
| Group4 | <i>Pteris semipinnata</i>      | ent-11 $\alpha$ -hydroxy-15-oxo-kaur-16-en-19-oic-acid (5F), 6 $\beta$ ,11 $\alpha$ -dihydroxy-15-oxo-ent-kaur-16-en-19-oic acid and 7 $\alpha$ ,11 $\alpha$ -dihydroxy-15-oxo-ent-kaur-16-en-19-oic acid                                                                                                                    | Anti-tumor effects(ent-11 $\alpha$ -hydroxy-15-oxo-kaur-16-en-19-oic-acid (5F)), P. semipinnata extract 5F inhibited the growth of human breast cancer cells in a time- and concentration-dependent manner, and that 5F induced apoptosis of human breast cancer cells. Treating leucorrhoea, sores, and skin irritations, antimicrobial and in vitro cytotoxic bioassay against human breast and prostate tumor cells. Leaf volatile oil demonstrated potent inhibitory activity against Hs 578T and PC-3 human breast and prostate tumor cells respectively, essential oils exhibited significant antimicrobial activity. Tonifying, replenishing, and invigorating blood as well as relieving pain, lubricating the intestines, and treating female irregular menstruation and amenorrhea, anti-inflammatory activity, antifibrotic action, antispasmodic activity, antioxidant activities, and neuroprotective action, as well as cardio- and cerebrovascular effects. | Hemostatic |
| Group4 | <i>Solanum erianthum</i>       | Essential oils( $\alpha$ -terpinolene, $\alpha$ -phellandrene, p-cymen and $\beta$ -pinene, $\alpha$ -humulene, humulene epoxide II, caryophyllene oxide, methyl salicylate $\beta$ -caryophyllene, (E)-phytol, pentadecanal pentadecane, $\alpha$ -humulene, $\beta$ -caryophyllene, ethyl palmitate, and methyl salicylate | antimicrobial and in vitro cytotoxic bioassay against human breast and prostate tumor cells. Leaf volatile oil demonstrated potent inhibitory activity against Hs 578T and PC-3 human breast and prostate tumor cells respectively, essential oils exhibited significant antimicrobial activity. Tonifying, replenishing, and invigorating blood as well as relieving pain, lubricating the intestines, and treating female irregular menstruation and amenorrhea, anti-inflammatory activity, antifibrotic action, antispasmodic activity, antioxidant activities, and neuroprotective action, as well as cardio- and cerebrovascular effects.                                                                                                                                                                                                                                                                                                                            | Hemostatic |
| Group5 | <i>Angelica sinensis</i>       | polysaccharides, ligustilide and ferulic acid                                                                                                                                                                                                                                                                                | antimicrobial and in vitro cytotoxic bioassay against human breast and prostate tumor cells. Leaf volatile oil demonstrated potent inhibitory activity against Hs 578T and PC-3 human breast and prostate tumor cells respectively, essential oils exhibited significant antimicrobial activity. Tonifying, replenishing, and invigorating blood as well as relieving pain, lubricating the intestines, and treating female irregular menstruation and amenorrhea, anti-inflammatory activity, antifibrotic action, antispasmodic activity, antioxidant activities, and neuroprotective action, as well as cardio- and cerebrovascular effects.                                                                                                                                                                                                                                                                                                                            | Tonic      |
| Group5 | <i>Astragalus chinensis</i>    | Formononetin, terpenoid, flavonoid, rhamnocitrin, calycosin, $\beta$ -daucosterol, rhamnocitrin-3-O- $\beta$ -d-glucoside.                                                                                                                                                                                                   | Antioxidant, anti-proliferative and anti-inflammatory activities                                                                                                                                                                                                                                                                                                                                                                                                                                                                                                                                                                                                                                                                                                                                                                                                                                                                                                           | Tonic      |
| Group5 | <i>Astragalus membranaceus</i> | Polysaccharides, flavonoids, terpenoid, and saponins                                                                                                                                                                                                                                                                         | Immunomodulating, antioxidant, anti-inflammatory, and anticancer effects                                                                                                                                                                                                                                                                                                                                                                                                                                                                                                                                                                                                                                                                                                                                                                                                                                                                                                   | Tonic      |
| Group5 | <i>Chengiopanax fargesii</i>   | Undescribed                                                                                                                                                                                                                                                                                                                  | Undescribed                                                                                                                                                                                                                                                                                                                                                                                                                                                                                                                                                                                                                                                                                                                                                                                                                                                                                                                                                                | Tonic      |
| Group5 | <i>Cullen corylifolium</i>     | Isoflavone(corylin), bakuchiol, meroterpenes, furanocoumarins, flavonoids, and terpenoid compounds (essential oil), furanocoumarins, psoralen and angelicin (isopsoralen)                                                                                                                                                    | Anti-ageing, anti-pigmentation, anti-acne, anti-cancer, hepatoprotective, cardioprotective, hypoglycemic, hypolipemic, antidepressant, antioxidant, anti-inflammatory and antimicrobial                                                                                                                                                                                                                                                                                                                                                                                                                                                                                                                                                                                                                                                                                                                                                                                    | Tonic      |



|        |                                           |                                                                                                                                                                                                                                                                                                        |                                                                                                                                                                                                                                                                                                                                                               |                                           |
|--------|-------------------------------------------|--------------------------------------------------------------------------------------------------------------------------------------------------------------------------------------------------------------------------------------------------------------------------------------------------------|---------------------------------------------------------------------------------------------------------------------------------------------------------------------------------------------------------------------------------------------------------------------------------------------------------------------------------------------------------------|-------------------------------------------|
| Group5 | <i>Lycium chinense</i>                    | Polysaccharides, fatty-acid(Palmitic acid,Palmitoleic acid, Palmitoleic acid, Stearic acid, Oleic acid, Linoleic acid, Arachidic acid, $\alpha$ -Linolenic acid, Gondoic acid, Lignoceric acid), 2,2-diphenyl-1-picrylhydrazyl (DPPH) and 2,2'-azino-bis(3-ethyl-benzthiazoline-sulfonic acid) (ABTS), | Treating diabetic nephropathy by suppressing renal oxidative stress and inflammation, with antioxidant activity                                                                                                                                                                                                                                               | Tonic                                     |
| Group5 | <i>Panax ginseng C. A. Meyer</i>          | Ginseng saponins (ginsenosides), polyacetylenes(ferulic, cinnamic, and syringic acid), phenolic compounds (flavonoids and phenolic acids), terpenoid, essential oils, polysaccharides, microelements, and vitamins, non-saponin(phenolic acids)                                                        | Non-saponin(phenolic acids) has strong antioxidant, anticancer, antidiabetic, and immunomodulating activities. Flavonoids and their related compounds possess strong antioxidative characteristics. Vitamins are biologically active organic compounds that are essential micronutrients involved in metabolic and physiological functions in the human body. | Tonic                                     |
| Group5 | <i>Panax japonicus var. angustifolius</i> | Ginsenoside Rb1, Ginsenoside Re, Ginsenoside Rd<br>Ginsenoside Rg1,<br>Notoginsenoside R2,<br>chikusetsusaponin IV,<br>chikusetsusaponin IVa ,<br>chikusetsusaponin V,<br>pseudoginsenoside RT1,<br>Majonoside R2, Ginsenoside Ro, Chikusetsusaponin IV,<br>Chikusetsusaponin Iva                      | Dissolve stasis and stop bleeding, alleviate swelling and pain, eliminate phlegm, stop coughing and act as an expectorant and tonic; feeble and strong. The representative chemical compounds effect on verious cancers.                                                                                                                                      | Tonic                                     |
| Group5 | <i>Panax quinquefolium</i> Linn           | Ginsenosides, saponins of the glycosides group, terpenoid.                                                                                                                                                                                                                                             | Anti-cancer activity, anti-diabetic potential; antimicrobial effect. Displays anti-cancer effect by induction of apoptosis of cancer cells and reducing local inflammation.                                                                                                                                                                                   | Tonic                                     |
| Group6 | <i>Acmella paniculata</i>                 | Undescribed                                                                                                                                                                                                                                                                                            | Undescribed                                                                                                                                                                                                                                                                                                                                                   | Rsthmatics, expectorants and antitussives |
| Group6 | <i>Aristolochia tagala</i>                | Kaempferol, indomethacin, A. tagala EA                                                                                                                                                                                                                                                                 | Treating rheumatic pains and fever, dyspepsia, flatulence, stomachaches, and snakebites, anti-inflammatory, also used as galactagogue and emmenagogue                                                                                                                                                                                                         | Rsthmatics, expectorants and antitussives |

|        |                              |                                                                                                                                                                               |                                                                                                                                                                                                                                                                                                                                                                                                                |                                           |
|--------|------------------------------|-------------------------------------------------------------------------------------------------------------------------------------------------------------------------------|----------------------------------------------------------------------------------------------------------------------------------------------------------------------------------------------------------------------------------------------------------------------------------------------------------------------------------------------------------------------------------------------------------------|-------------------------------------------|
| Group6 | <i>Crotalaria ferruginea</i> | Isoflavonoid(4'-hydroxy-2'-methylalpinum-isoflavone), quercetin                                                                                                               | Anti-inflammatory, inhibitory activities against phosphodiesterase-4 (PDE4), a therapeutic target of asthma<br>Anti-inflammatory and antioxidative activities,                                                                                                                                                                                                                                                 | Rsthmatics, expectorants and antitussives |
| Group6 | <i>Inula japonica</i> Thunb. | Polysaccharides, essential oils, dimeric sesquiterpene lactones(japonicones, neojaponicones), luteolin, quercetagenin, 3,4-dimethyl ether, britanin, quercetin and tomentosin | control asthma, coughs, and phlegm. Luteolin, quercetagenin, 3,4-dimethyl ether, britanin, and tomentosin, have been shown to potently inhibit topoisomerase activity and cytotoxicity in A549 and HT-29 cell                                                                                                                                                                                                  | Rsthmatics, expectorants and antitussives |
| Group7 | <i>Bischofia javanica</i>    | Phytochemicals viz. beta-amyrine, ursolic acid, betulinic acid, chrysoeriol, quercetin, friedelan-3-one, beta-sitosterol, fisetin, cynaroside and triacontane                 | Anti-diabetic, antileukemic, antiparasitic, antimicrobial, anti-inflammatory, and antinociceptive activities, treatment of various chronic conditions like inflammation, tuberculosis, ulcer, fracture, dislocation, diarrhea, sore throat, and nervous disorder                                                                                                                                               | Water-disinhibiting and damp-percolating  |
| Group7 | <i>Humulus scandens</i>      | Flavonoids                                                                                                                                                                    | Treat tuberculosis, dysentery and chronic colitis, inhibit the proliferation of splenocytes induced by concanavalin A, lipopolysaccharides, and mixed-lymphocyte reaction in vitro.                                                                                                                                                                                                                            | Water-disinhibiting and damp-percolating  |
| Group7 | <i>Polygonum aviculare</i>   | Quercitrin hydrate, caffeic acid, quercetin and rutin.<br>Epigallocatechin-3-gallate (EGCG) is the main component of anti-tumor.                                              | Antioxidant, anti-obesity, wound healing,                                                                                                                                                                                                                                                                                                                                                                      | Water-disinhibiting and damp-percolating  |
| Group8 | <i>Cyperus rotundus</i>      | Essential oils, phenolic acids, ascorbic acids, terpenoid and flavonoids in the tuber and rhizomes.                                                                           | Treating cancer, diarrhea, diabetes, pyresis, inflammation, malaria, and stomach and bowel disorders, used as antiandrogenic, antibacterial, anticancerous, anticonvulsant, antidiabetic, antidiarrheal, antigenotoxic, anti-inflammatory, antilipidemic, antimalarial, antimutagenic, antiobesity, antioxidant, anti-uropathogenic, hepatoprotective, cardioprotective, neuroprotective, and nootropic agent. | Qi-regulating                             |

|        |                                             |                                                                                                                                                                                                                                                     |                                                                                                                                                                                                                                                                                                                                                                                                                                                                                                                                                                                                                                                                            |                        |
|--------|---------------------------------------------|-----------------------------------------------------------------------------------------------------------------------------------------------------------------------------------------------------------------------------------------------------|----------------------------------------------------------------------------------------------------------------------------------------------------------------------------------------------------------------------------------------------------------------------------------------------------------------------------------------------------------------------------------------------------------------------------------------------------------------------------------------------------------------------------------------------------------------------------------------------------------------------------------------------------------------------------|------------------------|
| Group8 | Fruitlet of <i>Citrus aurantium</i> L.      | Limonene, linalool, and $\beta$ -myrcene, alkaloid(p-synephrine), flavanones                                                                                                                                                                        | Anticancer, antianxiety, antiobesity, antibacterial, antioxidant, pesticidal, and antidiabetic                                                                                                                                                                                                                                                                                                                                                                                                                                                                                                                                                                             | Qi-regulating          |
| Group8 | Immature ruit of <i>Citrus aurantium</i> L. | Five flavanones and two polymethoxyflavones were isolated and evaluated for inhibitory activity against xanthine oxidase in vitro. Of the compounds, hesperetin showed more potent inhibitory activity                                              | C. aurantium dried immature fruits showed the highest xanthine oxidase inhibitory activity                                                                                                                                                                                                                                                                                                                                                                                                                                                                                                                                                                                 | Qi-regulating          |
| Group9 | <i>Entada phaseoloides</i>                  | Triterpene(entagenic acid), triterpene saponins, homogentisic acid and entadamide A, rheediinosides A and B, phenolic compounds and flavonoids                                                                                                      | treat skin diseases, anti-complement, rheediinosides A and B showed moderate anti-proliferative and antioxidant activity                                                                                                                                                                                                                                                                                                                                                                                                                                                                                                                                                   | Heat-clearingastrigent |
| Group9 | <i>Myristica fragrans</i>                   | Lignans, neolignans, diphenylalkanes, phenylpropanoids, and terpenoids. Macelignan, meso-dihydroguaiaretic acid, myristicin, and malabaricone C are the most active compounds. mace, nutmeg, and essential oils are three major commercial products | As a remedy for strengthening the stomach and expelling "wind-evil", and as an alleged abortifacient and narcotic. Mace is used to treat humoral asthma, low-grade fever, and to alleviate gastrointestinal complaints when mixed with aromatics. Nutmeg has been used medicinally to treat diarrhea, rheumatism, headaches, psychosis, fever, bad breath, nausea, stomach cramps, chronic vomiting, hemorrhoids, and to stimulate appetite, and to control flatulence. Nutmeg oil is used for the treatment of rheumatism, diarrhea, cholera, intestinal disorders, stomach cramps, and flatulence, and to dissolve kidney stones and alleviate infections of the kidney. | Heat-clearingastrigent |
| Group9 | <i>Schisandra chinensis</i>                 | Lignans                                                                                                                                                                                                                                             | With adaptogenic effects, central nervous system stimulation, hepatoprotective effects and potential anticancer potential and treat various neurodegenerative diseases.                                                                                                                                                                                                                                                                                                                                                                                                                                                                                                    | Heat-clearingastrigent |

|         |                                |                                                                                                                                                                                                                                                                         |                                                                                                                                                                                                                                                                                                                                                                                                                 |                                      |
|---------|--------------------------------|-------------------------------------------------------------------------------------------------------------------------------------------------------------------------------------------------------------------------------------------------------------------------|-----------------------------------------------------------------------------------------------------------------------------------------------------------------------------------------------------------------------------------------------------------------------------------------------------------------------------------------------------------------------------------------------------------------|--------------------------------------|
| Group10 | <i>Gelsemium elegans</i>       | Alkaloids(19,2--Epoxyhumantenine, (4R)-19-oxo-gelsevirine N4-oxide, gelsedethenine, 1-,11-dimethoxy-N1-demethoxy-gelsemamide, 11-demethoxy-gelsemazonamide ), six types of indole alkaloids(sarpagine, koumine, humantenine, gelsedine, gelsemine, and yohimbane-type), | Treat diseases such as pain, skin ulcers, and spasticity. With antitumor, anti-inflammatory, analgesic and antidepressant activities                                                                                                                                                                                                                                                                            | Detoxifying, analgesia, antipruritic |
| Group10 | <i>Ricinus communis</i>        | Fatty acid ricinoleic acid, castor oil                                                                                                                                                                                                                                  | Treatment of infection and inflammation, a valued industrial raw material for lubricants, paints, coats, cosmetic products                                                                                                                                                                                                                                                                                      | Detoxifying, analgesia, antipruritic |
| Group11 | <i>Arctium lappa</i>           | Tannin, arctigenin, arctiin, beta-eudesmol, caffeic acid, chlorogenic acid, inulin, trachelogenin 4, sitosterol-beta-D-glucopyran- oside, lappaol and diarctigenin                                                                                                      | "detoxify" blood in terms of TCM and promote blood circulation to the skin surface, improving the skin quality/texture and curing skin diseases like eczema. Antioxidants and antidiabetic, anti-inflammatory effects and potent inhibitory effects on the growth of tumors such as pancreatic carcinoma, treating chronic diseases such as cancers, diabetes and AIDS. Arctigenin is the anti-cancer compound. | Unclassified                         |
| Group11 | <i>Cornus macrophylla</i>      | Alkaloids, steroids, terpenoids, flavonoids, reducing sugars, and tannins                                                                                                                                                                                               | Treat backache, jaundice, and stomach ulcers, with antifungal, antibacterial, and antioxidant activities, exhibited a strong inhibition of aldose reductase, and it may be a potential candidate for the treatment of diabetic retinopathy                                                                                                                                                                      | Unclassified                         |
| Group11 | <i>Glycosmis pentaphylla</i>   | Undescribed                                                                                                                                                                                                                                                             | Undescribed                                                                                                                                                                                                                                                                                                                                                                                                     | Unclassified                         |
| Group11 | <i>Ligustrum confusum</i>      | Undescribed                                                                                                                                                                                                                                                             | Undescribed                                                                                                                                                                                                                                                                                                                                                                                                     | Unclassified                         |
| Group11 | <i>Mallotus barbatus</i>       | Undescribed                                                                                                                                                                                                                                                             | Undescribed                                                                                                                                                                                                                                                                                                                                                                                                     | Unclassified                         |
| Group11 | <i>Platycodon grandiflorus</i> | Steroidal saponins, flavonoids, polyacetylenes, sterols, phenolics, terpenoid, and other bioactive compounds                                                                                                                                                            | Treatments of cough, phlegm, sore throat, lung abscess, chest pain, dysuria, and dysentery, with anti-inflammatory, immunostimulatory, anti-tumor, anti-oxidant, anti-diabetic, anti-obesity, hepatoprotective and cardiovascular system effects                                                                                                                                                                | Unclassified                         |

|         |                                     |                                                                                                                                                                             |                                                                                                                                                                                                                                                                                                            |                   |
|---------|-------------------------------------|-----------------------------------------------------------------------------------------------------------------------------------------------------------------------------|------------------------------------------------------------------------------------------------------------------------------------------------------------------------------------------------------------------------------------------------------------------------------------------------------------|-------------------|
| Group11 | <i>Ricinus communis</i> L.          | Ricin, Ricinin, p-Coumaric acid, Epigallocatechin and Ricinoleic acid                                                                                                       | Hepatoprotective, anti-inflammatory, diuretic, anti-cancer, anti-bacterial, insecticidal, hypoglycemic, laxative, abortifacient, for wounds, ulcers and free radical scavenging, anthelmintic                                                                                                              | Unclassified      |
| Group11 | <i>Sesbania bispinosa</i>           | Undescribed                                                                                                                                                                 | Undescribed                                                                                                                                                                                                                                                                                                | Unclassified      |
| Group11 | <i>Sesbania bispinosa</i>           | Undescribed                                                                                                                                                                 | Undescribed                                                                                                                                                                                                                                                                                                | Unclassified      |
| Group11 | <i>Solanum aculeatissimum</i>       | Chlorogenic, ferulic acids, orientin, quercitrin and, quercetin, steroidal alkaloids, pyridines, withanolides, sesquiterpenes and diterpenes, glycoalkaloids and flavonoids | With cytotoxic, antifungal and antitumor effects                                                                                                                                                                                                                                                           | Unclassified      |
| Group11 | <i>Solanum melongena</i>            | Undescribed                                                                                                                                                                 | Undescribed                                                                                                                                                                                                                                                                                                | Unclassified      |
| Group11 | <i>Zanthoxylum bungeanum Maxim.</i> | Undescribed                                                                                                                                                                 | Undescribed                                                                                                                                                                                                                                                                                                | Unclassified      |
| Group12 | Cabozantinib                        | -                                                                                                                                                                           | It is a small molecule and potent receptor inhibited many tyrosine kinases, such as MET, RET, vascular endothelial growth factor receptor 2 (VEGFR2) and other receptor tyrosine kinases, which play an important role in multiple tumors' angiogenesis, invasion and metastasis, including breast cancer. | Positive controls |
| Group12 | cis-Platinum 1                      | -                                                                                                                                                                           | inhibit the DNA replication process of cancer cells and damage the structure of cell membrane, and has a strong broad-spectrum anti-cancer effect                                                                                                                                                          | Positive controls |
| Group12 | cis-Platinum 2                      | -                                                                                                                                                                           | inhibit the DNA replication process of cancer cells and damage the structure of cell membrane, and has a strong broad-spectrum anti-cancer effect                                                                                                                                                          | Positive controls |
| Group12 | Docetaxel                           | -                                                                                                                                                                           | It is an antimicrotubulin agent through perturbing microtubule dynamics, leading to chronic activation of the spindle assembly checkpoint and inhibition of the anaphase promoting complex that delays the degradation of cyclin B1 and inhibits mitotic exit.                                             | Positive controls |

|         |                           |   |                                                                                                                                                                                                                                                                                                                                                                                                                                   |                   |
|---------|---------------------------|---|-----------------------------------------------------------------------------------------------------------------------------------------------------------------------------------------------------------------------------------------------------------------------------------------------------------------------------------------------------------------------------------------------------------------------------------|-------------------|
| Group12 | Doxorubicin hydrochloride | - | Used for early and advanced breast cancer. Its mechanism of anticancer effect is intercalation into DNA and the subsequent disruption of topoisomerase-II-mediated DNA repair. It also involves oxidative stress to cellular membranes, DNA and proteins                                                                                                                                                                          | Positive controls |
| Group12 | Gefitinib                 | - | It is used as second-line treatment of NSCLC after cytotoxic therapies, treatment of ERBB1-mutant lung cancer, induce the growth inhibition of endocrine-resistant MCF-7 breast cancer cells via reducing AKT and MAPK phosphorylation, and produced a synergistic effect with tamoxifen administration                                                                                                                           | Positive controls |
| Group12 | Gemcitabine               | - | It is a nucleoside analog chemotherapy which is widely used for different types of neoplasia and was clinically approved for the treatment of metastatic breast cancer. It requires triphosphate activation to get incorporated into DNA double helix resulting in inhibition of DNA synthesis. In chemotherapy strategy of breast cancer, gemcitabine always beening used with cisplatin or paclitaxel to perform better effect. | Positive controls |
| Group12 | Lenvatinib                | - | It is a small-molecule tyrosine kinase inhibitor contributed to tumor angiogenesis by inhibiting function of multiple receptors, including vascular endothelial growth factor receptor (VEGFR1-3), fibroblast growth factor receptor (FGFR1-4), platelet-derived growth factor receptor a (PDGFRa), stem cell factor receptor (KIT), and rearranged during transfection (RET).                                                    | Positive controls |

|         |              |   |                                                                                                                                                                                                                                                                                                                                                                                                                                                                                                   |                   |
|---------|--------------|---|---------------------------------------------------------------------------------------------------------------------------------------------------------------------------------------------------------------------------------------------------------------------------------------------------------------------------------------------------------------------------------------------------------------------------------------------------------------------------------------------------|-------------------|
| Group12 | Paclitaxel 1 | - | <p>It is a very prominent cytotoxic agent and widely used as first line therapy (alone or in combination) for many common and recurrent malignancies (lung, breast, ovarian and head and neck cancer). it's reported that PTX can inhibit primary tumor progress and protects against angiogenesis and late-stage metastasis</p>                                                                                                                                                                  | Positive controls |
| Group12 | Paclitaxel 2 | - | <p>It is a very prominent cytotoxic agent and widely used as first line therapy (alone or in combination) for many common and recurrent malignancies (lung, breast, ovarian and head and neck cancer). it's reported that PTX can inhibit primary tumor progress and protects against angiogenesis and late-stage metastasis</p>                                                                                                                                                                  | Positive controls |
| Group12 | Sorafenib    | - | <p>A small-molecule agent that inhibits multiple kinases in vitro, including B-RAF, CRAF, VEGFR2, VEGFR3, PDGFR-b, FLT-3 and c-KIT. It disrupts Ras-MAPK and VEGFR signaling to the treatment of colon, kidney, lung and breast cancer with the mechanism of inhibiting proliferation and angiogenesis. It reported combined sorafenib with gemcitabine and/or capecitabine performing better efficacy than sorafenib monotherapy or with taxanes and bevacizumab in breast cancer treatment.</p> | Positive controls |

|         |             |   |                                                                                                                                                                                                                                                                                                                                                                                                                                                                                                                                                                                                                                                                                                                                                                                                                                                                                                                                                                                                                                                                                                                                                                                                                                                                                                                                                                                               |                   |
|---------|-------------|---|-----------------------------------------------------------------------------------------------------------------------------------------------------------------------------------------------------------------------------------------------------------------------------------------------------------------------------------------------------------------------------------------------------------------------------------------------------------------------------------------------------------------------------------------------------------------------------------------------------------------------------------------------------------------------------------------------------------------------------------------------------------------------------------------------------------------------------------------------------------------------------------------------------------------------------------------------------------------------------------------------------------------------------------------------------------------------------------------------------------------------------------------------------------------------------------------------------------------------------------------------------------------------------------------------------------------------------------------------------------------------------------------------|-------------------|
| Group12 | Sorafenib   | - | <p>A small-molecule agent that inhibits multiple kinases in vitro, including B-RAF, CRAF, VEGFR2, VEGFR3, PDGFR-b, FLT-3 and c-KIT. It disrupts Ras-MAPK and VEGFR signaling to the treatment of colon, kidney, lung and breast cancer with the mechanism of inhibiting proliferation and angiogenesis. It reported combined sorafenib with gemcitabine and/or capecitabine performing better efficacy than sorafenib monotherapy or with taxanes and bevacizumab in breast cancer treatment.</p> <p>It is an antimitotic anticancer and microtubule destabilizing agent for treatment of lung cancer and breast cancer by inhibiting microtubule dynamics to promote a mitotic arrest and cell death, its main targets are tubulin and microtubules. Besides, Vinorelbine inhibited the cancer cell proliferation by MTT and colony formation assays and inducing G2/M arrest and cell apoptosis via regulation of Bax, Bcl-2, and Bcl-xL.</p> <p>It is an antimitotic anticancer and microtubule destabilizing agent for treatment of lung cancer and breast cancer by inhibiting microtubule dynamics to promote a mitotic arrest and cell death, its main targets are tubulin and microtubules. Besides, Vinorelbine inhibited the cancer cell proliferation by MTT and colony formation assays and inducing G2/M arrest and cell apoptosis via regulation of Bax, Bcl-2, and Bcl-xL.</p> | Positive controls |
| Group12 | Viborelbine | - | <p>It is an antimitotic anticancer and microtubule destabilizing agent for treatment of lung cancer and breast cancer by inhibiting microtubule dynamics to promote a mitotic arrest and cell death, its main targets are tubulin and microtubules. Besides, Vinorelbine inhibited the cancer cell proliferation by MTT and colony formation assays and inducing G2/M arrest and cell apoptosis via regulation of Bax, Bcl-2, and Bcl-xL.</p> <p>It is an antimitotic anticancer and microtubule destabilizing agent for treatment of lung cancer and breast cancer by inhibiting microtubule dynamics to promote a mitotic arrest and cell death, its main targets are tubulin and microtubules. Besides, Vinorelbine inhibited the cancer cell proliferation by MTT and colony formation assays and inducing G2/M arrest and cell apoptosis via regulation of Bax, Bcl-2, and Bcl-xL.</p>                                                                                                                                                                                                                                                                                                                                                                                                                                                                                                   | Positive controls |
| Group12 | Viborelbine | - | <p>It is an antimitotic anticancer and microtubule destabilizing agent for treatment of lung cancer and breast cancer by inhibiting microtubule dynamics to promote a mitotic arrest and cell death, its main targets are tubulin and microtubules. Besides, Vinorelbine inhibited the cancer cell proliferation by MTT and colony formation assays and inducing G2/M arrest and cell apoptosis via regulation of Bax, Bcl-2, and Bcl-xL.</p> <p>It is an antimitotic anticancer and microtubule destabilizing agent for treatment of lung cancer and breast cancer by inhibiting microtubule dynamics to promote a mitotic arrest and cell death, its main targets are tubulin and microtubules. Besides, Vinorelbine inhibited the cancer cell proliferation by MTT and colony formation assays and inducing G2/M arrest and cell apoptosis via regulation of Bax, Bcl-2, and Bcl-xL.</p>                                                                                                                                                                                                                                                                                                                                                                                                                                                                                                   | Positive controls |
| Group13 | Control 1   | - | -                                                                                                                                                                                                                                                                                                                                                                                                                                                                                                                                                                                                                                                                                                                                                                                                                                                                                                                                                                                                                                                                                                                                                                                                                                                                                                                                                                                             | Negative controls |
| Group13 | Control 2   | - | -                                                                                                                                                                                                                                                                                                                                                                                                                                                                                                                                                                                                                                                                                                                                                                                                                                                                                                                                                                                                                                                                                                                                                                                                                                                                                                                                                                                             | Negative controls |
| Group13 | Control 8   | - | -                                                                                                                                                                                                                                                                                                                                                                                                                                                                                                                                                                                                                                                                                                                                                                                                                                                                                                                                                                                                                                                                                                                                                                                                                                                                                                                                                                                             | Negative controls |
| Group13 | Control 9   | - | -                                                                                                                                                                                                                                                                                                                                                                                                                                                                                                                                                                                                                                                                                                                                                                                                                                                                                                                                                                                                                                                                                                                                                                                                                                                                                                                                                                                             | Negative controls |

---



Supplemental Table 7 Hub gene list

| Module   | Gene name |
|----------|-----------|
| green    | RAB3B     |
|          | DUSP4     |
|          | C11orf91  |
|          | TMEM158   |
|          | IRAK2     |
|          | BMERB1    |
|          | PLAU      |
|          | PLEK2     |
|          | KCNJ16    |
|          | TM4SF20   |
| darkgrey | NPAS2     |
|          | MYORG     |

The filtered nodes of green module (weight > 0.13)

| fromNode  | toNode       | weight      |
|-----------|--------------|-------------|
| CCDC198   | ETS1         | 0.130026839 |
| APBB1IP   | FOXO1        | 0.130070104 |
| FAM83A    | RAB3B        | 0.130072371 |
| PTPRH     | TPBG         | 0.130085683 |
| CDCP1     | EOMES        | 0.130159367 |
| SOCS2-AS1 | TMEM158      | 0.130188214 |
| FOXL1     | IRAK2        | 0.130240608 |
| OSBP2     | RAB3B        | 0.130253772 |
| SLC25A37  | SMURF2       | 0.130258256 |
| C11orf91  | IFNGR2       | 0.130262147 |
| FOXL1     | RAB3B        | 0.130293609 |
| APBB1IP   | MARCHF4      | 0.130325585 |
| C11orf91  | SQOR         | 0.130349806 |
| BMERB1    | SEMA4B       | 0.130360535 |
| IRAK2     | IRF2BPL      | 0.130389125 |
| HRH1      | OLR1         | 0.130421149 |
| CHST11    | RAB3B        | 0.130441352 |
| COTL1     | PXN          | 0.130454701 |
| KIAA1549L | TMEM158      | 0.130460936 |
| BMERB1    | LOC105371123 | 0.130488795 |
| CHST11    | HRH1         | 0.130496101 |
| KCNN4     | MARCHF4      | 0.130514323 |

|              |              |             |
|--------------|--------------|-------------|
| SMURF2       | TMEM156      | 0.130524966 |
| CDCP1        | DRAIC        | 0.130538901 |
| C11orf91     | PDGFB        | 0.130572378 |
| ITGB8        | SERPINB7     | 0.130632207 |
| IRAK2        | SLC35F3      | 0.130698282 |
| CACNG8       | ETS1         | 0.13070102  |
| ARID5B       | IRAK2        | 0.130723681 |
| PLAUR        | PLEK2        | 0.130735447 |
| HRH1         | PDGFB        | 0.130741219 |
| ETS1         | MEAK7        | 0.13078729  |
| ETS1         | TMEM156      | 0.130885352 |
| CHST11       | SFRP4        | 0.130919859 |
| MEAK7        | OSBP2        | 0.130996789 |
| PLEK2        | SLC23A1      | 0.131033422 |
| BMERB1       | RAB3B        | 0.131044879 |
| LOC107987457 | RAB3B        | 0.131051264 |
| CACNG6       | CDCP1        | 0.131058483 |
| MEAK7        | TOR4A        | 0.131061609 |
| FOXO1        | MARCHF4      | 0.131083825 |
| C11orf91     | SPTB         | 0.131182222 |
| CHST11       | MYO1A        | 0.131210799 |
| KRT15        | TMEM158      | 0.131249076 |
| IRAK2        | LOC101927751 | 0.131252754 |
| MARCHF4      | VIL1         | 0.131269187 |
| MUC16        | SERPINB7     | 0.13131928  |
| C11orf91     | ETS1         | 0.131365264 |
| ETS1         | MARCHF4      | 0.131378007 |
| DDC          | TPBG         | 0.131380087 |
| C11orf91     | XDH          | 0.131401019 |
| PPP1R18      | SMURF2       | 0.131439203 |
| CDCP1        | SLC7A7       | 0.131473303 |
| CDCP1        | ITGB4        | 0.131486506 |
| CDCP1        | SP6          | 0.131564387 |
| CFLAR        | ETS1         | 0.131600308 |
| MEAK7        | PEAR1        | 0.131601378 |
| P3H2         | SMURF2       | 0.13162835  |
| TMEM158      | TPBG         | 0.131674804 |
| CDCP1        | PLXNC1       | 0.131684356 |
| SMURF2       | TPBG         | 0.13169958  |
| C11orf91     | CD9          | 0.13170579  |
| CTSL         | IRAK2        | 0.131770688 |
| SERPINB7     | TMOD1        | 0.131790328 |

---

|           |          |             |
|-----------|----------|-------------|
| LINC00941 | TMEM158  | 0.131807233 |
| DDX58     | TMOD1    | 0.131899905 |
| SH3BP4    | SMURF2   | 0.131917297 |
| SFRP4     | TMEM158  | 0.131988315 |
| CDCP1     | EFR3B    | 0.131993843 |
| EFR3B     | PLEK2    | 0.13199805  |
| ANXA13    | SLC23A1  | 0.132049992 |
| MEAK7     | PTPRH    | 0.132051236 |
| EFR3B     | IRAK2    | 0.132066308 |
| APOH      | MEAK7    | 0.132082719 |
| HDAC5     | PTPRH    | 0.13208761  |
| MARCHF4   | PTPRH    | 0.132104323 |
| MYO1A     | TMEM158  | 0.132155599 |
| CHST11    | EPHB2    | 0.132175406 |
| PTPRH     | ZNF185   | 0.132192261 |
| IRAK2     | MT2A     | 0.132194181 |
| MEAK7     | SMURF2   | 0.132211182 |
| BMERB1    | SOCS2    | 0.132211585 |
| FOXO1     | GPR176   | 0.132275366 |
| MT2A      | PLEK2    | 0.132292708 |
| ACACB     | C11orf91 | 0.132316438 |
| DDC       | PLEK2    | 0.132363813 |
| CACNG6    | MEAK7    | 0.132411958 |
| CHST11    | HGD      | 0.132426942 |
| BCAS1     | CHST11   | 0.132455865 |
| MEAK7     | PDGFB    | 0.132490188 |
| RAB3B     | TMCC2    | 0.132498297 |
| MYO1A     | PLEK2    | 0.132500387 |
| BMERB1    | TPBG     | 0.132585245 |
| CLMP      | ETS1     | 0.132591508 |
| BMERB1    | UNC13A   | 0.132633115 |
| BMERB1    | TOR4A    | 0.132636326 |
| IRAK2     | KRT15    | 0.132638489 |
| PDGFB     | TMEM158  | 0.132646634 |
| AFAP1L2   | CDCP1    | 0.132648127 |
| ETS1      | PLEK2    | 0.132733602 |
| BMERB1    | MT2A     | 0.132738563 |
| RPL22P2   | SLC23A1  | 0.132745041 |
| BMERB1    | CTSL     | 0.132813892 |
| C11orf91  | GPR176   | 0.132881512 |
| ANXA10    | RAB3B    | 0.132907649 |
| BCAS1     | SLC23A1  | 0.132953207 |

---

---

|              |              |             |
|--------------|--------------|-------------|
| FOXO1        | P3H2         | 0.132971092 |
| SQOR         | TPBG         | 0.132976018 |
| SMURF2       | TBC1D8       | 0.133006065 |
| AFAP1L2      | C11orf91     | 0.133061051 |
| GAS2         | TMEM158      | 0.133125185 |
| EFR3B        | TPBG         | 0.133143987 |
| CDCP1        | LOC107987457 | 0.133154925 |
| GLI2         | SMURF2       | 0.133241812 |
| AREG         | ETS1         | 0.133270616 |
| C11orf91     | HGD          | 0.133279428 |
| DNAH17       | IRAK2        | 0.133305089 |
| BMERB1       | EOMES        | 0.133307591 |
| IRAK2        | SFRP4        | 0.133310852 |
| IFNGR2       | IRAK2        | 0.133334198 |
| FOXO1        | HMGA2        | 0.133387572 |
| EPHB2        | KIAA1549L    | 0.13339022  |
| IRAK2        | SH3KBP1      | 0.13339716  |
| PLEK2        | TPBG         | 0.13339923  |
| SLC35G2      | SMURF2       | 0.133404071 |
| HRH1         | PPP1R18      | 0.133435697 |
| AFAP1L1      | C11orf91     | 0.133471307 |
| MEAK7        | SOCS2-AS1    | 0.13349137  |
| RAB3B        | TPBG         | 0.133534174 |
| HRH1         | MB           | 0.133582163 |
| IRAK2        | TMEM37       | 0.13358379  |
| HRH1         | KRT15        | 0.133663482 |
| PEAR1        | PLEK2        | 0.13366449  |
| SERPINB7     | SPTB         | 0.133665406 |
| ARID5B       | MARCHF4      | 0.133684091 |
| IRAK2        | SP6          | 0.133707629 |
| AFAP1L1      | IRAK2        | 0.133752656 |
| LOC101927751 | MEAK7        | 0.133869126 |
| LAMC2        | SMURF2       | 0.133973671 |
| ANXA10       | PLEK2        | 0.133975828 |
| DDC          | TMEM158      | 0.133979765 |
| CACNG6       | IRAK2        | 0.134046378 |
| SFR1         | SMURF2       | 0.134055116 |
| PLEK2        | RAB3B        | 0.134104231 |
| IRAK2        | PHLDA1       | 0.134118657 |
| BCAS1        | PLEK2        | 0.134141533 |
| MYH16        | SERPINB7     | 0.134143556 |
| CDCP1        | RAB3B        | 0.13414407  |

---

---

|              |              |             |
|--------------|--------------|-------------|
| LAMC2        | TMEM158      | 0.134179418 |
| MEAK7        | PPP1R18      | 0.134191077 |
| BMERB1       | TMC5         | 0.134210121 |
| ADH6         | SLC23A1      | 0.134228817 |
| BMERB1       | DUSP4        | 0.134230961 |
| PLAT         | RAB3B        | 0.13426901  |
| CHST11       | TPBG         | 0.13430383  |
| PEAR1        | SMURF2       | 0.134310233 |
| MEAK7        | RPL22P2      | 0.13433487  |
| CDCP1        | PXN          | 0.134370941 |
| CDCP1        | SOCS2-AS1    | 0.134399619 |
| CFLAR        | IRAK2        | 0.134420781 |
| ARID5B       | C11orf91     | 0.134488536 |
| CDCP1        | HMGA1        | 0.134513111 |
| CDCP1        | SP100        | 0.13455244  |
| C11orf91     | HDAC5        | 0.134558006 |
| FOXC2        | SMURF2       | 0.134598618 |
| HRH1         | LOC107987457 | 0.134627122 |
| LOC105375517 | RAB3B        | 0.13465337  |
| C11orf91     | CHST11       | 0.134654196 |
| IRAK2        | TPBG         | 0.134700847 |
| DHRS9        | IRAK2        | 0.134713287 |
| RIN2         | SMURF2       | 0.134729196 |
| MARCHF4      | ZNF185       | 0.134758207 |
| AFAP1L1      | TPBG         | 0.134760071 |
| CDCP1        | MT2A         | 0.134817437 |
| ARID5B       | SMURF2       | 0.134851074 |
| AFAP1L1      | PLEK2        | 0.134880124 |
| CDCP1        | OPTN         | 0.134908913 |
| DSE          | GPR176       | 0.134941675 |
| BMERB1       | SLC7A7       | 0.134991631 |
| MARCHF4      | MEAK7        | 0.135011976 |
| PTGES        | TMEM158      | 0.135035204 |
| ETS1         | SLC7A7       | 0.13504535  |
| APBB1IP      | HRH1         | 0.135116263 |
| KIAA1549L    | LAMC2        | 0.135238291 |
| CDCP1        | SEMA7A       | 0.135254136 |
| BCO1         | ETS1         | 0.135311906 |
| ETS1         | TMEM158      | 0.135316284 |
| IRAK2        | RAB3B        | 0.135387949 |
| BMERB1       | DDC          | 0.135428262 |
| HGD          | HRH1         | 0.135444186 |

---

---

|              |              |             |
|--------------|--------------|-------------|
| CHST11       | TMEM158      | 0.135537161 |
| HMGA2        | MARCHF4      | 0.135537373 |
| FOXL1        | PLEK2        | 0.135553457 |
| SMURF2       | UNC13A       | 0.135568348 |
| CDCP1        | LOC105374986 | 0.135581771 |
| BIK          | RAB3B        | 0.135648217 |
| RAB3B        | STC1         | 0.135654744 |
| BMERB1       | PLXNC1       | 0.13565477  |
| LOC107987457 | TMEM158      | 0.135657801 |
| BMERB1       | HMGA1        | 0.135669218 |
| CDCP1        | LOC107986160 | 0.135669661 |
| ETS1         | KIRREL1      | 0.135732366 |
| CDCP1        | THBD         | 0.135777254 |
| PLAU         | SMURF2       | 0.135789669 |
| INA          | MEAK7        | 0.13580119  |
| CHST11       | DHRS9        | 0.135811411 |
| C11orf91     | HECW2        | 0.135811997 |
| KIAA1549L    | SFRP4        | 0.135844365 |
| C11orf91     | SERPINB7     | 0.135867611 |
| C11orf91     | PTGES        | 0.135914845 |
| HGD          | TMEM158      | 0.135960524 |
| CHST11       | ETS1         | 0.135965888 |
| LOC105371123 | SMURF2       | 0.13599302  |
| PLEK2        | SQOR         | 0.136013241 |
| PLAU         | TPBG         | 0.136018385 |
| ETS1         | KIAA1549L    | 0.136028137 |
| BMERB1       | PLAUR        | 0.13604561  |
| ETS1         | HRH1         | 0.136055773 |
| C11orf91     | FOXO1        | 0.136095254 |
| CCDC198      | HRH1         | 0.13616362  |
| CDCP1        | SLC35F3      | 0.136177813 |
| BMERB1       | TMEM37       | 0.136244761 |
| MARCHF4      | P3H2         | 0.136249106 |
| BMERB1       | PXN          | 0.136349269 |
| RAB3B        | TMEM158      | 0.136360276 |
| EFHD2        | RAB3B        | 0.136364531 |
| C11orf91     | PLAU         | 0.136446345 |
| LINC01697    | SMURF2       | 0.136493462 |
| IRAK2        | RERG         | 0.13653792  |
| CACNG8       | IRAK2        | 0.136576426 |
| BMERB1       | ITGA3        | 0.136598441 |
| MAML2        | RAB3B        | 0.136616054 |

---

---

|          |              |             |
|----------|--------------|-------------|
| EPHB2    | IRAK2        | 0.136622415 |
| CDCP1    | FOXB1        | 0.13664514  |
| DKK3     | RAB3B        | 0.13666264  |
| PLAU     | TMEM158      | 0.136668215 |
| DSE      | SPTB         | 0.136681295 |
| CDCP1    | DDC          | 0.136737242 |
| BMERB1   | MB           | 0.13674013  |
| ETS1     | TFPI2        | 0.136764969 |
| CTSL     | ETS1         | 0.136787372 |
| MEAK7    | TMEM158      | 0.136805652 |
| DHRS9    | TPBG         | 0.136834568 |
| BMERB1   | LOC105374986 | 0.136838127 |
| MIR100HG | SMURF2       | 0.136876118 |
| PXN      | TOR4A        | 0.136877019 |
| ETS1     | SH3KBP1      | 0.136899031 |
| AFAP1L2  | IRAK2        | 0.136953907 |
| APOH     | SMURF2       | 0.136983247 |
| BMERB1   | EPHB2        | 0.137015216 |
| C11orf91 | TPBG         | 0.13701729  |
| BMERB1   | PHLDA1       | 0.137047965 |
| CDCP1    | KRT15        | 0.137053097 |
| HRH1     | KCNN4        | 0.137065211 |
| FOXO1    | SPTB         | 0.137081646 |
| CDCP1    | CTSL         | 0.137106423 |
| IRAK2    | PXN          | 0.13716775  |
| CA8      | RAB3B        | 0.137243383 |
| AXL      | CDCP1        | 0.137243783 |
| C11orf91 | EFR3B        | 0.137314122 |
| ANXA3    | SMURF2       | 0.137368853 |
| SLC23A1  | VIL1         | 0.137412083 |
| CHST11   | FOXL1        | 0.137421362 |
| IRAK2    | PDGFB        | 0.137438569 |
| HRH1     | OSBP2        | 0.137486901 |
| BCO2     | CDCP1        | 0.137494551 |
| MARCHF4  | RPL22P2      | 0.137588178 |
| AKR1B10  | AKR1B15      | 0.137596111 |
| HECW2    | HRH1         | 0.137601078 |
| RAB3B    | SOX13        | 0.137646857 |
| KRT15    | RAB3B        | 0.137662139 |
| BMERB1   | DHRS9        | 0.13768652  |
| A1CF     | BMERB1       | 0.137719134 |
| ANXA13   | SMURF2       | 0.137739237 |

---

|              |              |             |
|--------------|--------------|-------------|
| HRH1         | ZNF185       | 0.137755568 |
| PPP1R18      | TMEM158      | 0.137785432 |
| IRAK2        | SQOR         | 0.137788133 |
| BMERB1       | PDGFB        | 0.137808394 |
| C11orf91     | DDC          | 0.137900347 |
| C11orf91     | HMGA2        | 0.137952564 |
| GPRC5A       | RAB3B        | 0.138000027 |
| DSE          | SERPINB3     | 0.1380877   |
| FOXL1        | TPBG         | 0.138203218 |
| ALDH1A3      | SMURF2       | 0.138233178 |
| LAMC2        | RAB3B        | 0.138241525 |
| APOLD1       | CDCP1        | 0.138282995 |
| MEAK7        | UNC13A       | 0.138309112 |
| HRH1         | VIL1         | 0.138339745 |
| DUSP4        | SMURF2       | 0.138432145 |
| MARCHF4      | OLR1         | 0.138486476 |
| BMERB1       | PEAR1        | 0.138525514 |
| CHST11       | RPL22P2      | 0.138557153 |
| ADH6         | SMURF2       | 0.138558548 |
| IRAK2        | TMC5         | 0.138590119 |
| CHST11       | MARCHF4      | 0.138597966 |
| C11orf91     | CA8          | 0.138663881 |
| FOXO1        | SMURF2       | 0.138668639 |
| LAMC2        | TPBG         | 0.138680238 |
| CDCP1        | SEMA4B       | 0.138684833 |
| MEAK7        | PXN          | 0.138733876 |
| SMURF2       | STAMBPL1     | 0.138747061 |
| DDX58        | RAB3B        | 0.138760168 |
| BCAS1        | SMURF2       | 0.13882196  |
| CDCP1        | MEAK7        | 0.138825331 |
| CDCP1        | ETS1         | 0.13889033  |
| CTSL         | SMURF2       | 0.13893775  |
| LOC105374003 | SMURF2       | 0.138938448 |
| ETS1         | VIL1         | 0.139038827 |
| EGR1         | JUN          | 0.139059455 |
| C11orf91     | LOC107987457 | 0.139086494 |
| IRAK2        | LOC107987457 | 0.13911227  |
| HGD          | PLEK2        | 0.13911793  |
| AHNAK2       | CDCP1        | 0.139189333 |
| BCAS1        | ETS1         | 0.139189532 |
| CA8          | IRAK2        | 0.139192359 |
| HBEGF        | IRAK2        | 0.13926613  |



|              |          |             |
|--------------|----------|-------------|
| CACNG8       | SMURF2   | 0.139283965 |
| IRAK2        | MEAK7    | 0.139353701 |
| HRH1         | RAB3B    | 0.139461508 |
| CHST11       | VIL1     | 0.139475466 |
| CDCP1        | PEAR1    | 0.139532447 |
| MIR100HG     | RAB3B    | 0.139575068 |
| RAB3B        | RASA4DP  | 0.139597336 |
| BMERB1       | SFRP4    | 0.139670176 |
| OLR1         | RAB3B    | 0.139681635 |
| ANKS4B       | PLEK2    | 0.139743939 |
| HRH1         | MEAK7    | 0.139790222 |
| ETS1         | IRAK2    | 0.1398295   |
| CDCP1        | SOCS2    | 0.139831439 |
| MEAK7        | PLEK2    | 0.139870036 |
| CHST11       | PLEK2    | 0.139905154 |
| C11orf91     | KCNN4    | 0.139917657 |
| IGF2         | RAB3B    | 0.139949854 |
| ARID5B       | HRH1     | 0.139952209 |
| RPL22P2      | TPBG     | 0.139955544 |
| AFAP1L1      | BMERB1   | 0.140124602 |
| RASSF2       | SMURF2   | 0.140158507 |
| C11orf91     | MEAK7    | 0.140177726 |
| C11orf91     | LAMC2    | 0.140288426 |
| KIAA1549L    | PLAU     | 0.14041012  |
| EOMES        | HRH1     | 0.140415106 |
| C11orf91     | P3H2     | 0.140441183 |
| ETS1         | HECW2    | 0.140585685 |
| BMERB1       | CACNG8   | 0.140643575 |
| ANKS4B       | C11orf91 | 0.140672254 |
| ARHGAP31     | RAB3B    | 0.140690655 |
| RAB3B        | SERPINB3 | 0.1406937   |
| ANG          | SLC23A1  | 0.140711386 |
| LOC107987457 | PLEK2    | 0.140745561 |
| ANG          | ETS1     | 0.140759888 |
| CDCP1        | PHLDA1   | 0.140866273 |
| BMERB1       | GAS2     | 0.14095646  |
| CDCP1        | SLC25A37 | 0.140979166 |
| PLEK2        | PTPRH    | 0.140995828 |
| ETS1         | TNFRSF21 | 0.141127656 |
| COL17A1      | RAB3B    | 0.141196814 |
| HMGA2        | SMURF2   | 0.141248154 |
| MUC16        | SPTB     | 0.14127578  |

---

|          |              |             |
|----------|--------------|-------------|
| DHRS9    | PLEK2        | 0.141305583 |
| PLEK2    | PPP1R18      | 0.141322128 |
| CDCP1    | OSBP2        | 0.141343153 |
| C11orf91 | PPP1R18      | 0.14144255  |
| DSE      | ITGB8        | 0.141458252 |
| ETS1     | LINC01697    | 0.14148901  |
| C11orf91 | ZNF185       | 0.14152357  |
| PTPRH    | RAB3B        | 0.141567767 |
| C11orf91 | OSBP2        | 0.141676812 |
| ETS1     | HGD          | 0.141679263 |
| BMERB1   | SQOR         | 0.141924227 |
| PAQR5    | SMURF2       | 0.141954274 |
| ANXA13   | ETS1         | 0.142030635 |
| IRAK2    | UNC13A       | 0.142036591 |
| ETS1     | PAQR5        | 0.142042668 |
| BMERB1   | CACNG6       | 0.14206148  |
| CDCP1    | SH3KBP1      | 0.142092597 |
| IRAK2    | SOCS2-AS1    | 0.142109456 |
| BCAS1    | TMEM158      | 0.142122199 |
| BMERB1   | SOCS2-AS1    | 0.142167418 |
| ADH6     | IRAK2        | 0.142247041 |
| CD274    | RAB3B        | 0.142255775 |
| FOXO1    | HRH1         | 0.14235052  |
| OSBP2    | TMEM158      | 0.142353948 |
| IRAK2    | LAMC2        | 0.142509393 |
| CDCP1    | ITGA3        | 0.142647883 |
| BMERB1   | LOC107987457 | 0.14266459  |
| CDCP1    | LOC105374003 | 0.142685165 |
| HRH1     | PTPRH        | 0.142717483 |
| IRAK2    | SLC23A1      | 0.142726287 |
| ICAM1    | IRAK2        | 0.142729112 |
| AFAP1L1  | CDCP1        | 0.142732726 |
| GPR176   | TMOD1        | 0.142753632 |
| BMERB1   | MEAK7        | 0.142759716 |
| HRH1     | UNC13A       | 0.142815151 |
| SMURF2   | TMC5         | 0.142914225 |
| BMERB1   | INA          | 0.143006858 |
| CXCL2    | CXCL3        | 0.143044845 |
| IRAK2    | PEAR1        | 0.143085055 |
| IRAK2    | LINC01697    | 0.143100824 |
| CCDC9B   | RAB3B        | 0.143153708 |
| ETS1     | SOCS2        | 0.143165916 |

---

---

|           |           |             |
|-----------|-----------|-------------|
| HRH1      | TMEM158   | 0.143255454 |
| RAB3B     | VEGFC     | 0.143415556 |
| CDCP1     | SMURF2    | 0.143441465 |
| PLEK2     | TMEM158   | 0.143518422 |
| LINC00941 | MEAK7     | 0.143650881 |
| CD274     | DSE       | 0.14366817  |
| BMERB1    | KRT15     | 0.14374935  |
| HRH1      | PLEK2     | 0.143753921 |
| CDCP1     | PAQR5     | 0.143784188 |
| MB        | TMEM158   | 0.143896629 |
| BMERB1    | HECW2     | 0.143944559 |
| C11orf91  | KRT15     | 0.143968219 |
| ETS1      | TMC5      | 0.143998334 |
| CDCP1     | PLAUR     | 0.144060178 |
| PLEK2     | VIL1      | 0.144075071 |
| CHST11    | LAMC2     | 0.144080135 |
| DUSP4     | IRAK2     | 0.144083065 |
| DSE       | MYH16     | 0.144142385 |
| AKR1B10   | RAB3B     | 0.144176673 |
| LAMC2     | PLEK2     | 0.144181853 |
| CDCP1     | HECW2     | 0.144356534 |
| SMURF2    | TNFRSF21  | 0.144508731 |
| CHST11    | KIAA1549L | 0.144653391 |
| RERG      | TMEM158   | 0.144667465 |
| C11orf91  | VIL1      | 0.144684696 |
| PHLDA1    | SMURF2    | 0.144708332 |
| IRAK2     | SOCS2     | 0.144833103 |
| BMERB1    | KIAA1549L | 0.144849294 |
| CA8       | HRH1      | 0.144958923 |
| APBB1IP   | RAB3B     | 0.145034333 |
| C11orf91  | RAB3B     | 0.145043189 |
| LTBP2     | RAB3B     | 0.145050457 |
| APOH      | ETS1      | 0.145257252 |
| ADH6      | ETS1      | 0.145338162 |
| EOMES     | IRAK2     | 0.14534174  |
| C11orf91  | PLEK2     | 0.145360792 |
| LOC728975 | RAB3B     | 0.145451364 |
| BMERB1    | LAMC2     | 0.145460828 |
| ETS1      | STAMBPL1  | 0.145525742 |
| CDCP1     | PSMD10P2  | 0.145559198 |
| IRAK2     | OSBP2     | 0.145580079 |
| APOH      | IRAK2     | 0.145595318 |

---

|          |           |             |
|----------|-----------|-------------|
| SMURF2   | TMEM158   | 0.145652103 |
| ETS1     | PHLDA1    | 0.145660799 |
| SMURF2   | TFPI2     | 0.145756115 |
| PITPNC1  | RAB3B     | 0.146095914 |
| DSE      | RAB3B     | 0.146311639 |
| CACNG8   | CDCP1     | 0.1463404   |
| CDCP1    | INA       | 0.14641832  |
| ANG      | SMURF2    | 0.146499552 |
| ETS1     | SLC35F3   | 0.146562467 |
| BMERB1   | OSBP2     | 0.146601011 |
| ANXA3    | ETS1      | 0.146618249 |
| PLEK2    | SMURF2    | 0.146669745 |
| SLC35F3  | SMURF2    | 0.146756893 |
| SLC7A7   | SMURF2    | 0.146806111 |
| HGD      | SLC23A1   | 0.14696476  |
| RAB3B    | RPL22P2   | 0.147040881 |
| BMERB1   | ETS1      | 0.147075675 |
| PLAU     | PLEK2     | 0.147099961 |
| C11orf91 | MB        | 0.147247874 |
| HECW2    | IRAK2     | 0.147287567 |
| IRAK2    | KIAA1549L | 0.147293979 |
| RAB3B    | TCIM      | 0.147490507 |
| CD9      | RAB3B     | 0.147497887 |
| ETS1     | SLC23A1   | 0.147583538 |
| CDCP1    | TMEM37    | 0.147713492 |
| KIRREL1  | SMURF2    | 0.147770983 |
| CCDC198  | SMURF2    | 0.147771826 |
| HMGA2    | HRH1      | 0.147854179 |
| CHST11   | PLAU      | 0.147958108 |
| SMURF2   | TMEM37    | 0.148043453 |
| CDCP1    | FOXL1     | 0.148053466 |
| BMERB1   | SLC23A1   | 0.148111943 |
| CDCP1    | DUSP4     | 0.148175819 |
| C11orf91 | TMEM158   | 0.14819112  |
| BMERB1   | RERG      | 0.148409437 |
| HGD      | IRAK2     | 0.14853323  |
| CDCP1    | PPP1R18   | 0.148550467 |
| CHST11   | IRAK2     | 0.148574635 |
| ETS1     | SMURF2    | 0.148604263 |
| SLC23A1  | SLC7A7    | 0.148668966 |
| HRH1     | P3H2      | 0.1487745   |
| IRAK2    | SMURF2    | 0.1488995   |

|              |           |             |
|--------------|-----------|-------------|
| DDC          | RAB3B     | 0.148902189 |
| INA          | IRAK2     | 0.149115793 |
| ANKS4B       | CDCP1     | 0.149188974 |
| IRAK2        | PPP1R18   | 0.14923455  |
| CDCP1        | SLC23A1   | 0.149287129 |
| C11orf91     | SMURF2    | 0.149394436 |
| MB           | RAB3B     | 0.149468875 |
| BMERB1       | CHST11    | 0.149496091 |
| KRT15        | PLEK2     | 0.149548629 |
| MARCHF4      | PLEK2     | 0.149938109 |
| BMERB1       | SMURF2    | 0.149983953 |
| CDCP1        | DHRS9     | 0.15011006  |
| CDCP1        | TPBG      | 0.150151585 |
| MB           | PTPRH     | 0.15019348  |
| MYO1A        | SLC23A1   | 0.150216142 |
| ANKS4B       | TMEM158   | 0.150287276 |
| LOC101927789 | RAB3B     | 0.150358673 |
| CDCP1        | SQOR      | 0.150390908 |
| HDAC5        | RAB3B     | 0.150461914 |
| C11orf91     | HRH1      | 0.150600846 |
| CDCP1        | HRH1      | 0.150660138 |
| RPL22P2      | TMEM158   | 0.150748529 |
| RAB3B        | ZSWIM4    | 0.151083918 |
| CDCP1        | PTPRH     | 0.151193979 |
| CDCP1        | RERG      | 0.151469697 |
| RAB3B        | TSPAN5    | 0.151533156 |
| CA8          | SMURF2    | 0.15179252  |
| BMERB1       | PPP1R18   | 0.151881484 |
| ETS1         | INA       | 0.152031283 |
| RAB3B        | TMOD1     | 0.152092022 |
| CFLAR        | SMURF2    | 0.152157521 |
| IRAK2        | MYO1A     | 0.15238559  |
| IRAK2        | PTPRH     | 0.152387595 |
| RPL22P2      | SMURF2    | 0.152405273 |
| CDCP1        | SFRP4     | 0.152541441 |
| ADH6         | BMERB1    | 0.152622702 |
| CHST11       | SMURF2    | 0.152750431 |
| IRAK2        | PLAU      | 0.152797967 |
| BMERB1       | LINC01697 | 0.153000579 |
| PLEK2        | RPL22P2   | 0.153197117 |
| DSE          | TMOD1     | 0.1534633   |
| EOMES        | SMURF2    | 0.153473837 |

|           |           |             |
|-----------|-----------|-------------|
| ETS1      | TMEM37    | 0.153516585 |
| KIAA1549L | SMURF2    | 0.153731721 |
| MARCHF4   | SMURF2    | 0.153969401 |
| C11orf91  | PTPRH     | 0.154002187 |
| SMURF2    | VIL1      | 0.154140366 |
| BMP6      | RAB3B     | 0.154154915 |
| BMERB1    | HRH1      | 0.154223413 |
| RAB3B     | ZNF185    | 0.154343224 |
| ANKS4B    | IRAK2     | 0.154428096 |
| MARCHF4   | RAB3B     | 0.15452971  |
| CDCP1     | TMC5      | 0.154579089 |
| BMERB1    | LINC00941 | 0.154754455 |
| SMURF2    | SOCS2     | 0.154805357 |
| LTB       | RAB3B     | 0.154840878 |
| BMERB1    | PLAU      | 0.154896462 |
| CDCP1     | MARCHF4   | 0.154938141 |
| PTPRH     | TMEM158   | 0.155004711 |
| ETS1      | LINC00941 | 0.155090165 |
| CDCP1     | HGD       | 0.155157291 |
| BCAS1     | IRAK2     | 0.15533267  |
| P3H2      | RAB3B     | 0.155385096 |
| ETS1      | MYO1A     | 0.155530411 |
| ACACB     | RAB3B     | 0.155640864 |
| ARID5B    | RAB3B     | 0.155666702 |
| TMEM158   | VIL1      | 0.155788947 |
| ADH6      | CDCP1     | 0.156239968 |
| PTGES     | RAB3B     | 0.156455547 |
| HRH1      | RPL22P2   | 0.156522354 |
| BMERB1    | HGD       | 0.15654832  |
| CDCP1     | RPL22P2   | 0.156598981 |
| IRAK2     | LINC00941 | 0.156961464 |
| MARCHF4   | TMEM158   | 0.156967409 |
| APOH      | BMERB1    | 0.157028925 |
| BMERB1    | PTPRH     | 0.157130382 |
| HRH1      | IRAK2     | 0.157155597 |
| CDCP1     | IRAK2     | 0.157243307 |
| ANKS4B    | BMERB1    | 0.157329604 |
| C11orf91  | RPL22P2   | 0.157700517 |
| BMERB1    | MYO1A     | 0.157775829 |
| RAB3B     | SFRP1     | 0.157926925 |
| RIMBP3B   | RIMBP3C   | 0.158050446 |
| C11orf91  | MARCHF4   | 0.158240143 |

---

|           |           |             |
|-----------|-----------|-------------|
| CDCP1     | LINC00941 | 0.15836318  |
| BMERB1    | C11orf91  | 0.158378842 |
| FOXO1     | RAB3B     | 0.158594777 |
| CDCP1     | LAMC2     | 0.158648453 |
| SLC23A1   | SMURF2    | 0.158673007 |
| LINC00941 | SMURF2    | 0.158927448 |
| IRAK2     | RPL22P2   | 0.15906152  |
| HRH1      | MARCHF4   | 0.159180722 |
| IRAK2     | PLEK2     | 0.159181974 |
| HECW2     | SMURF2    | 0.159222937 |
| HMGA2     | RAB3B     | 0.15957527  |
| EFR3B     | RAB3B     | 0.159841632 |
| HRH1      | SMURF2    | 0.159843135 |
| C11orf91  | IRAK2     | 0.160218635 |
| CDCP1     | LINC01697 | 0.160512763 |
| IRAK2     | VIL1      | 0.160616928 |
| HGD       | SMURF2    | 0.160633917 |
| C11orf91  | CDCP1     | 0.160892163 |
| BMERB1    | RPL22P2   | 0.161065742 |
| MYO1A     | SMURF2    | 0.161401142 |
| IRAK2     | TMEM158   | 0.161480727 |
| IRAK2     | MARCHF4   | 0.161481601 |
| CDCP1     | MYO1A     | 0.161651736 |
| BMERB1    | IRAK2     | 0.161926326 |
| RAB3B     | XDH       | 0.162173385 |
| CDCP1     | EPHB2     | 0.162281662 |
| BCAS1     | BMERB1    | 0.162290035 |
| INA       | SMURF2    | 0.162692456 |
| SH3KBP1   | SMURF2    | 0.16283137  |
| BMERB1    | PLEK2     | 0.163071147 |
| BMERB1    | MARCHF4   | 0.163552764 |
| BMERB1    | TMEM158   | 0.163637805 |
| MYH16     | RAB3B     | 0.164886756 |
| APOH      | CDCP1     | 0.165335529 |
| MUC16     | RAB3B     | 0.165541347 |
| CDCP1     | PLEK2     | 0.165581578 |
| CDCP1     | VIL1      | 0.165830527 |
| CDCP1     | KIAA1549L | 0.166155913 |
| KCNN4     | RAB3B     | 0.166376899 |
| CDCP1     | CHST11    | 0.166803002 |
| BCAS1     | CDCP1     | 0.166906967 |
| BMERB1    | VIL1      | 0.167371773 |

---

|        |          |             |
|--------|----------|-------------|
| CDCP1  | TMEM158  | 0.169522536 |
| CDCP1  | PLAU     | 0.170177584 |
| GPR176 | RAB3B    | 0.170860332 |
| BMERB1 | CDCP1    | 0.173088735 |
| RAB3B  | SERPINB7 | 0.173802012 |
| CPM    | RAB3B    | 0.175816775 |
| ITGB8  | RAB3B    | 0.176641296 |
| CD44   | RAB3B    | 0.176707453 |
| RAB3B  | SPTB     | 0.189136824 |

The filtered nodes of darkgrey module (weight > 0.06)

| fromNode | toNode       | weight      |
|----------|--------------|-------------|
| ABCB1    | NPY1R        | 0.062497218 |
| ABCB1    | TM4SF20      | 0.064090256 |
| ADAMTS16 | NPAS2        | 0.066080327 |
| ADAMTS16 | TM4SF20      | 0.062223667 |
| ADAMTS9  | KCNJ16       | 0.067341782 |
| ADAMTS9  | NPY1R        | 0.074904662 |
| ADAMTS9  | PPARGC1A     | 0.061869193 |
| ADAMTS9  | TM4SF20      | 0.081844673 |
| ADGRV1   | KCNJ16       | 0.064550971 |
| ADGRV1   | NPY1R        | 0.075987603 |
| ADGRV1   | SPTLC3       | 0.060828433 |
| ADGRV1   | TM4SF20      | 0.07005439  |
| AGMO     | CFI          | 0.065461339 |
| AGMO     | CHST9        | 0.065905599 |
| AGMO     | EPHA7        | 0.068606596 |
| AGMO     | KCNJ16       | 0.076749189 |
| AGMO     | MYORG        | 0.068113844 |
| AGMO     | NPY1R        | 0.095484522 |
| AGMO     | SPTLC3       | 0.066858921 |
| AGMO     | TM4SF20      | 0.083347257 |
| ANO3     | LOC101926943 | 0.061572219 |
| ANO3     | MAP7         | 0.069131648 |
| ANO3     | MYOCD        | 0.065875405 |
| ANO3     | MYORG        | 0.063157686 |
| ANO3     | OR51E2       | 0.067749595 |
| ANO3     | RASGEF1B     | 0.066900283 |
| ANO3     | SGK1         | 0.069383593 |
| ANO3     | SIK2         | 0.064542757 |



---

|         |              |             |
|---------|--------------|-------------|
| ANO3    | TM4SF20      | 0.084812974 |
| BRINP1  | DSCAM-AS1    | 0.061516783 |
| BRINP1  | KCNJ16       | 0.067308044 |
| BRINP1  | LOC107987015 | 0.061668476 |
| BRINP1  | MYORG        | 0.071758342 |
| BRINP1  | NPAS2        | 0.063914126 |
| BRINP1  | NPY1R        | 0.066513643 |
| BRINP1  | PALMD        | 0.060321884 |
| BRINP1  | PPARG        | 0.06861073  |
| BRINP1  | SPTLC3       | 0.061403508 |
| BRINP1  | TM4SF20      | 0.077838631 |
| C4BPA   | CFI          | 0.068406697 |
| C4BPA   | KCNJ16       | 0.081701432 |
| C4BPA   | MYORG        | 0.069329702 |
| C4BPA   | NPY1R        | 0.101139283 |
| C4BPA   | SPTLC3       | 0.064166803 |
| C4BPA   | TM4SF20      | 0.107641545 |
| C4orf19 | NPY1R        | 0.061224688 |
| CADM1   | CFI          | 0.075205516 |
| CADM1   | EPHA7        | 0.069817906 |
| CADM1   | KCNJ16       | 0.072405652 |
| CADM1   | MYORG        | 0.073916556 |
| CADM1   | NPAS2        | 0.065283897 |
| CADM1   | NPY1R        | 0.083249736 |
| CADM1   | SERPINE1     | 0.06335001  |
| CADM1   | SPTLC3       | 0.070898064 |
| CADM1   | TM4SF20      | 0.082892831 |
| CAPN8   | NPAS2        | 0.077194472 |
| CAPN8   | TM4SF20      | 0.063771672 |
| CASP9   | FURIN        | 0.0611201   |
| CD24    | CD24P4       | 0.101991661 |
| CD24    | MYORG        | 0.066778507 |
| CD24    | TM4SF20      | 0.06539906  |
| CFI     | CRB1         | 0.065836285 |
| CFI     | DSCAM-AS1    | 0.06477689  |
| CFI     | EPHA7        | 0.070703798 |
| CFI     | ERBB3        | 0.070783484 |
| CFI     | FOSL1        | 0.060684547 |
| CFI     | GDF7         | 0.062302347 |
| CFI     | KCNJ16       | 0.089452534 |
| CFI     | KCNK3        | 0.064305299 |
| CFI     | LDLRAD4      | 0.064618563 |

---

---

|         |              |             |
|---------|--------------|-------------|
| CFI     | LOC107987015 | 0.065174876 |
| CFI     | MYORG        | 0.094661962 |
| CFI     | NCALD        | 0.071934628 |
| CFI     | NPAS2        | 0.078490317 |
| CFI     | NPNT         | 0.062673028 |
| CFI     | NPY1R        | 0.101180326 |
| CFI     | OR51E2       | 0.066327426 |
| CFI     | OTOGL        | 0.062939738 |
| CFI     | PPARG        | 0.06250664  |
| CFI     | SERPINE1     | 0.061051155 |
| CFI     | SGK1         | 0.072384689 |
| CFI     | SPTLC3       | 0.078918915 |
| CFI     | TM4SF20      | 0.117827366 |
| CFI     | TRIM40       | 0.064099535 |
| CFI     | TSPAN13      | 0.063472317 |
| CFI     | UGT1A8       | 0.064437885 |
| CGN     | KCNJ16       | 0.06615508  |
| CGN     | MYORG        | 0.08201034  |
| CGN     | NPY1R        | 0.073272996 |
| CGN     | TM4SF20      | 0.068563752 |
| CHST9   | DNAJC22      | 0.070980079 |
| CHST9   | DSCAM-AS1    | 0.060790109 |
| CHST9   | EPHA7        | 0.074668434 |
| CHST9   | FLJ32255     | 0.06020999  |
| CHST9   | GRIK2        | 0.070288461 |
| CHST9   | HMGB3        | 0.067876329 |
| CHST9   | KCNJ16       | 0.085485477 |
| CHST9   | MYORG        | 0.072811807 |
| CHST9   | NCALD        | 0.06608753  |
| CHST9   | NPY1R        | 0.085533867 |
| CHST9   | OTOGL        | 0.064177418 |
| CHST9   | PPARGC1A     | 0.062808204 |
| CHST9   | SGK1         | 0.063348425 |
| CHST9   | SPTLC3       | 0.06840033  |
| CHST9   | TM4SF20      | 0.088883897 |
| CHST9   | TM4SF4       | 0.064208228 |
| CHST9   | TRIM40       | 0.061722253 |
| CLDN2   | CRB1         | 0.062623522 |
| CNTNAP2 | DSCAM-AS1    | 0.062798777 |
| CNTNAP2 | SERPINE1     | 0.070695501 |
| CNTNAP2 | SGK1         | 0.063992363 |
| COL4A1  | COL4A2       | 0.067180636 |

---

---

|           |           |             |
|-----------|-----------|-------------|
| COL4A4    | TM4SF20   | 0.061425226 |
| CPS1      | EPHA7     | 0.06951396  |
| CPS1      | GABRB3    | 0.069361439 |
| CPS1      | KCNJ16    | 0.069649617 |
| CPS1      | MAP7      | 0.061082951 |
| CPS1      | NPY1R     | 0.074944431 |
| CPS1      | PDE10A    | 0.062785065 |
| CPS1      | PDE3A     | 0.069364652 |
| CPS1      | PPARGC1A  | 0.079856655 |
| CPS1      | SGK1      | 0.06895702  |
| CPS1      | SPTLC3    | 0.065772653 |
| CPS1      | TM4SF20   | 0.077660824 |
| CRB1      | DSCAM-AS1 | 0.064034117 |
| CRB1      | GDF7      | 0.060521124 |
| CRB1      | GPR37     | 0.060560577 |
| CRB1      | KCNK3     | 0.068783258 |
| CRB1      | MYORG     | 0.06869265  |
| CRB1      | NPAS2     | 0.06982108  |
| CRB1      | P4HA3     | 0.073773013 |
| CRB1      | SERPINE1  | 0.075213792 |
| CRB1      | SGK1      | 0.079422205 |
| CRB1      | SIK1      | 0.061450837 |
| CRB1      | SPTLC3    | 0.063284957 |
| CRB1      | TM4SF20   | 0.081722566 |
| CTH       | LRP11     | 0.06268163  |
| CTH       | MAP7      | 0.067498241 |
| CTH       | PDE10A    | 0.066484022 |
| DNAJC22   | EPHA7     | 0.060289135 |
| DNAJC22   | KCNJ16    | 0.075105459 |
| DNAJC22   | MYORG     | 0.074347504 |
| DNAJC22   | NPY1R     | 0.085221914 |
| DNAJC22   | TM4SF20   | 0.096568179 |
| DNER      | FURIN     | 0.060709502 |
| DSCAM-AS1 | EPHA7     | 0.069406687 |
| DSCAM-AS1 | FLJ32255  | 0.065014224 |
| DSCAM-AS1 | KCNJ16    | 0.079861652 |
| DSCAM-AS1 | MYORG     | 0.072413712 |
| DSCAM-AS1 | NPAS2     | 0.074296958 |
| DSCAM-AS1 | NPY1R     | 0.078004133 |
| DSCAM-AS1 | PPARG     | 0.064437789 |
| DSCAM-AS1 | SERPINE1  | 0.069549762 |
| DSCAM-AS1 | SGK1      | 0.072734301 |

---

---

|           |              |             |
|-----------|--------------|-------------|
| DSCAM-AS1 | SPTLC3       | 0.067801986 |
| DSCAM-AS1 | TM4SF20      | 0.092724487 |
| DTX4      | MYORG        | 0.09488607  |
| DTX4      | NCALD        | 0.071983648 |
| DTX4      | NPY1R        | 0.073213038 |
| DTX4      | TM4SF20      | 0.076235869 |
| DUSP16    | MAP7         | 0.087472007 |
| DUSP16    | PDE10A       | 0.064296947 |
| DUSP16    | PPARGC1A     | 0.063316445 |
| DUSP16    | SGK1         | 0.066974996 |
| DUSP16    | TM4SF20      | 0.067563092 |
| DUSP16    | VASH2        | 0.067170353 |
| EPCAM     | NPNT         | 0.065170818 |
| EPCAM     | UGT1A8       | 0.08863221  |
| EPHA7     | FLJ32255     | 0.061250905 |
| EPHA7     | FOSL1        | 0.063129084 |
| EPHA7     | KCNJ16       | 0.083936912 |
| EPHA7     | LOC107987015 | 0.06895397  |
| EPHA7     | MAFF         | 0.063010608 |
| EPHA7     | MAP7         | 0.061126893 |
| EPHA7     | MOK          | 0.061369506 |
| EPHA7     | MYORG        | 0.080525861 |
| EPHA7     | NCALD        | 0.070490991 |
| EPHA7     | NPAS2        | 0.072607177 |
| EPHA7     | NPY1R        | 0.090321442 |
| EPHA7     | OTOGL        | 0.069955709 |
| EPHA7     | PALMD        | 0.060271571 |
| EPHA7     | PPARGC1A     | 0.068238094 |
| EPHA7     | SGK1         | 0.075776505 |
| EPHA7     | SPTLC3       | 0.07893258  |
| EPHA7     | SPTSSA       | 0.066430846 |
| EPHA7     | TM4SF20      | 0.094950503 |
| EPHA7     | TRIM40       | 0.062797847 |
| EPHA7     | VASH2        | 0.061881051 |
| ERBB3     | KCNJ16       | 0.069561895 |
| ERBB3     | MYORG        | 0.076466476 |
| ERBB3     | NPY1R        | 0.092299876 |
| ERBB3     | SPTLC3       | 0.071245156 |
| ERBB3     | TM4SF20      | 0.10483361  |
| ETNPPL    | NPY1R        | 0.06654239  |
| ETNPPL    | TM4SF20      | 0.077300183 |
| ETS2      | KCNJ16       | 0.065850163 |

---

---

|          |           |             |
|----------|-----------|-------------|
| ETS2     | LINC02732 | 0.063238344 |
| ETS2     | MAP7      | 0.072678579 |
| ETS2     | MYORG     | 0.075848855 |
| ETS2     | NPY1R     | 0.065945306 |
| ETS2     | OR51E2    | 0.068412525 |
| ETS2     | PHLPP1    | 0.062474161 |
| ETS2     | RASGEF1B  | 0.067668136 |
| ETS2     | SGK1      | 0.078524901 |
| ETS2     | TM4SF20   | 0.093972061 |
| FLJ32255 | KCNJ16    | 0.07086324  |
| FLJ32255 | LOXL2     | 0.061864182 |
| FLJ32255 | MOK       | 0.060863375 |
| FLJ32255 | MYORG     | 0.063068687 |
| FLJ32255 | NPAS2     | 0.073590962 |
| FLJ32255 | NPY1R     | 0.067626773 |
| FLJ32255 | PPARG     | 0.071901455 |
| FLJ32255 | SERPINE1  | 0.062653359 |
| FLJ32255 | SPTLC3    | 0.061437541 |
| FLJ32255 | TM4SF20   | 0.081104888 |
| FOSL1    | KCNJ16    | 0.077790858 |
| FOSL1    | MYORG     | 0.075665587 |
| FOSL1    | NPAS2     | 0.080907086 |
| FOSL1    | NPY1R     | 0.08708063  |
| FOSL1    | SHB       | 0.062269855 |
| FOSL1    | SPTLC3    | 0.067635208 |
| FOSL1    | TM4SF20   | 0.097703435 |
| FST      | RASGEF1B  | 0.066261434 |
| GABRB3   | LRP11     | 0.066350395 |
| GABRB3   | PDE10A    | 0.070564718 |
| GABRB3   | PDE3A     | 0.078015856 |
| GABRB3   | PPARGC1A  | 0.067911844 |
| GDF7     | MYORG     | 0.07868712  |
| GDF7     | NPAS2     | 0.063882691 |
| GDF7     | NPY1R     | 0.060468008 |
| GDF7     | OR51E2    | 0.072495881 |
| GDF7     | RASGEF1B  | 0.069938267 |
| GDF7     | SGK1      | 0.0729021   |
| GDF7     | TM4SF20   | 0.097345636 |
| GPR3     | NPAS2     | 0.068364401 |
| GPR3     | TM4SF20   | 0.067054244 |
| GRIK2    | NPY1R     | 0.063843434 |
| GRIK2    | TM4SF20   | 0.063506961 |

---

---

|         |              |             |
|---------|--------------|-------------|
| HEPH    | NPNT         | 0.062740783 |
| HMGB3   | KCNJ16       | 0.063634144 |
| HMGB3   | NPY1R        | 0.063989909 |
| HMGB3   | TM4SF20      | 0.068633378 |
| HOXA5   | MYORG        | 0.07324971  |
| HOXA5   | TM4SF20      | 0.068677587 |
| INPP1   | NPAS2        | 0.062227867 |
| INPP1   | TM4SF20      | 0.07161427  |
| KCNJ15  | SGK1         | 0.06096294  |
| KCNJ15  | TM4SF20      | 0.06162836  |
| KCNJ16  | LOC107987015 | 0.072747328 |
| KCNJ16  | LOXL2        | 0.067496044 |
| KCNJ16  | MAFF         | 0.078729754 |
| KCNJ16  | MAP7         | 0.066551806 |
| KCNJ16  | MOK          | 0.064000396 |
| KCNJ16  | MYOCD        | 0.065162166 |
| KCNJ16  | MYORG        | 0.08126494  |
| KCNJ16  | NCALD        | 0.085798057 |
| KCNJ16  | NPAS2        | 0.070776232 |
| KCNJ16  | NPY1R        | 0.104430011 |
| KCNJ16  | OR51E2       | 0.08799466  |
| KCNJ16  | OTOGL        | 0.082269966 |
| KCNJ16  | PALMD        | 0.070970366 |
| KCNJ16  | PPARG        | 0.060167411 |
| KCNJ16  | PPARGC1A     | 0.085650293 |
| KCNJ16  | PRG4         | 0.062740369 |
| KCNJ16  | RASGEF1B     | 0.064387716 |
| KCNJ16  | SGK1         | 0.087549209 |
| KCNJ16  | SHB          | 0.074923    |
| KCNJ16  | SPTLC3       | 0.095891707 |
| KCNJ16  | TM4SF20      | 0.116720375 |
| KCNJ16  | TM4SF4       | 0.080317907 |
| KCNJ16  | TRIM40       | 0.088915981 |
| KCNJ16  | TSPAN13      | 0.080811026 |
| KCNK3   | MYORG        | 0.071516451 |
| KCNK3   | NPAS2        | 0.060100284 |
| KCNK3   | SERPINE1     | 0.079920016 |
| KCNK3   | SGK1         | 0.068182425 |
| KCNK3   | TM4SF20      | 0.074309609 |
| LDLRAD4 | MYORG        | 0.068596848 |
| LDLRAD4 | NPY1R        | 0.072245194 |
| LDLRAD4 | SPTLC3       | 0.069353637 |

---

---

|              |          |             |
|--------------|----------|-------------|
| LDLRAD4      | TM4SF20  | 0.079226074 |
| LINC02732    | MYORG    | 0.064188829 |
| LINC02732    | TM4SF20  | 0.067247128 |
| LOC105378114 | TM4SF20  | 0.065167553 |
| LOC107986822 | SGK1     | 0.061609222 |
| LOC107986822 | TM4SF20  | 0.079703018 |
| LOC107987015 | MYORG    | 0.087129349 |
| LOC107987015 | NPAS2    | 0.072758679 |
| LOC107987015 | NPY1R    | 0.074918855 |
| LOC107987015 | SERPINE1 | 0.066599072 |
| LOC107987015 | SGK1     | 0.069744497 |
| LOC107987015 | SPTLC3   | 0.068467376 |
| LOC107987015 | TM4SF20  | 0.098901051 |
| LOXL2        | MYORG    | 0.061858941 |
| LOXL2        | NPAS2    | 0.071984911 |
| LOXL2        | NPY1R    | 0.068716909 |
| LOXL2        | PPARG    | 0.063962063 |
| LOXL2        | SHB      | 0.071407804 |
| LOXL2        | TM4SF20  | 0.081885708 |
| LRP11        | MAP7     | 0.078433022 |
| LRP11        | PDE10A   | 0.068550437 |
| LRP11        | PPARGC1A | 0.063566731 |
| LRP11        | SH3BP5   | 0.060645754 |
| LRP11        | VASH2    | 0.06076213  |
| MAFF         | MYORG    | 0.076072314 |
| MAFF         | NPAS2    | 0.07449805  |
| MAFF         | NPY1R    | 0.08674739  |
| MAFF         | SHB      | 0.067413876 |
| MAFF         | SPTLC3   | 0.062189069 |
| MAFF         | TM4SF20  | 0.09348823  |
| MAP7         | MYOCD    | 0.076740949 |
| MAP7         | MYORG    | 0.062471484 |
| MAP7         | NPY1R    | 0.069490674 |
| MAP7         | OR51E2   | 0.063276432 |
| MAP7         | PDE10A   | 0.096145918 |
| MAP7         | PHLPP1   | 0.067913001 |
| MAP7         | PPARGC1A | 0.07483028  |
| MAP7         | SGK1     | 0.079116881 |
| MAP7         | SH3BP5   | 0.109584331 |
| MAP7         | SIK1     | 0.078840694 |
| MAP7         | SIK1B    | 0.068259019 |
| MAP7         | SIK2     | 0.104472264 |

---

---

|        |          |             |
|--------|----------|-------------|
| MAP7   | SPTLC3   | 0.062096496 |
| MAP7   | SPTSSA   | 0.064246543 |
| MAP7   | TM4SF20  | 0.082909019 |
| MAP7   | TRNP1    | 0.061328509 |
| MAP7   | VASH2    | 0.080409886 |
| MOK    | MYORG    | 0.065409654 |
| MOK    | NPAS2    | 0.079812273 |
| MOK    | NPY1R    | 0.066023165 |
| MOK    | SERPINE1 | 0.063247283 |
| MOK    | TM4SF20  | 0.079014003 |
| MROCKI | NPY1R    | 0.062925314 |
| MROCKI | TM4SF20  | 0.070497852 |
| MUC13  | RAET1E   | 0.06190382  |
| MYOCD  | NPY1R    | 0.068265754 |
| MYOCD  | OR51E2   | 0.111846372 |
| MYOCD  | PPARGC1A | 0.076153331 |
| MYOCD  | RASGEF1B | 0.062229867 |
| MYOCD  | SGK1     | 0.070750821 |
| MYOCD  | TM4SF20  | 0.106590006 |
| MYORG  | NCALD    | 0.112787068 |
| MYORG  | NPAS2    | 0.072261621 |
| MYORG  | NPY1R    | 0.086033948 |
| MYORG  | OR51E2   | 0.084072909 |
| MYORG  | OTOGL    | 0.064692175 |
| MYORG  | PPARGC1A | 0.062496114 |
| MYORG  | PRG4     | 0.068039774 |
| MYORG  | RASGEF1B | 0.075860902 |
| MYORG  | SEC16B   | 0.064736013 |
| MYORG  | SERPINE1 | 0.066576842 |
| MYORG  | SGK1     | 0.08664826  |
| MYORG  | SHB      | 0.062881214 |
| MYORG  | SPTLC3   | 0.094127883 |
| MYORG  | TM4SF20  | 0.103570509 |
| MYORG  | TM4SF4   | 0.082796535 |
| MYORG  | TRIM40   | 0.077706476 |
| MYORG  | TSPAN13  | 0.070111507 |
| NCALD  | NPAS2    | 0.069356738 |
| NCALD  | NPY1R    | 0.098124572 |
| NCALD  | SPTLC3   | 0.073256521 |
| NCALD  | TM4SF20  | 0.11209724  |
| NPAS2  | NPY1R    | 0.069421281 |
| NPAS2  | OR51E2   | 0.072354455 |

---



---

|        |          |             |
|--------|----------|-------------|
| NPAS2  | PRAG1    | 0.066504271 |
| NPAS2  | RASGEF1B | 0.070968042 |
| NPAS2  | SERPINE1 | 0.073329833 |
| NPAS2  | SGK1     | 0.073545923 |
| NPAS2  | SHB      | 0.07332324  |
| NPAS2  | SPTLC3   | 0.080935171 |
| NPAS2  | TM4SF20  | 0.077636456 |
| NPAS2  | TRIM40   | 0.061338978 |
| NPAS2  | TRNP1    | 0.062734816 |
| NPAS2  | TSHZ3    | 0.061279039 |
| NPNT   | NPY1R    | 0.06707676  |
| NPNT   | PCSK5    | 0.061115646 |
| NPNT   | TM4SF20  | 0.061485806 |
| NPNT   | UGT1A8   | 0.062494238 |
| NPY1R  | OR51E2   | 0.095465626 |
| NPY1R  | OTOGL    | 0.10313723  |
| NPY1R  | PALMD    | 0.075545072 |
| NPY1R  | PCSK5    | 0.075861787 |
| NPY1R  | PPARGC1A | 0.093232644 |
| NPY1R  | PRG4     | 0.063874413 |
| NPY1R  | RASGEF1B | 0.06482692  |
| NPY1R  | SEC16B   | 0.068913309 |
| NPY1R  | SESN3    | 0.065583638 |
| NPY1R  | SGK1     | 0.095213945 |
| NPY1R  | SHB      | 0.077354921 |
| NPY1R  | SPTLC3   | 0.107831804 |
| NPY1R  | SPTSSA   | 0.062888625 |
| NPY1R  | TM4SF20  | 0.129097589 |
| NPY1R  | TM4SF4   | 0.079510656 |
| NPY1R  | TRIM40   | 0.103171678 |
| NPY1R  | TSPAN13  | 0.102220842 |
| NPY1R  | UGT1A8   | 0.06876419  |
| OR51E2 | PPARGC1A | 0.061173464 |
| OR51E2 | RASGEF1B | 0.071367405 |
| OR51E2 | SGK1     | 0.07229476  |
| OR51E2 | SIK1     | 0.078099209 |
| OR51E2 | SIK1B    | 0.07773581  |
| OR51E2 | SIK2     | 0.060262279 |
| OR51E2 | SLC45A4  | 0.078978258 |
| OR51E2 | SPTLC3   | 0.066967154 |
| OR51E2 | TM4SF20  | 0.139682687 |
| OTOGL  | SGK1     | 0.060987645 |

---

---

|          |          |             |
|----------|----------|-------------|
| OTOGL    | SPTLC3   | 0.071710975 |
| OTOGL    | TM4SF20  | 0.094130518 |
| PALMD    | PPARG    | 0.064740647 |
| PALMD    | TM4SF20  | 0.071859631 |
| PCSK5    | TM4SF20  | 0.060704866 |
| PDE10A   | PPARGC1A | 0.076166241 |
| PDE10A   | SGK1     | 0.075873403 |
| PDE10A   | SH3BP5   | 0.063512626 |
| PDE10A   | SIK1     | 0.06634949  |
| PDE10A   | SIK2     | 0.06533096  |
| PDE10A   | VASH2    | 0.077985337 |
| PHLPP1   | SIK2     | 0.061862454 |
| PHLPP1   | VASH2    | 0.067613434 |
| PPARG    | SERPINE1 | 0.069472228 |
| PPARGC1A | SGK1     | 0.070910091 |
| PPARGC1A | SH3BP5   | 0.064631856 |
| PPARGC1A | SIK1     | 0.060071605 |
| PPARGC1A | SIK2     | 0.071981201 |
| PPARGC1A | SPTLC3   | 0.067514768 |
| PPARGC1A | TM4SF20  | 0.098844954 |
| PPARGC1A | VASH2    | 0.070128497 |
| PRG4     | TM4SF20  | 0.090203697 |
| RASGEF1B | SGK1     | 0.074004119 |
| RASGEF1B | SIK1     | 0.068150488 |
| RASGEF1B | SIK1B    | 0.066131333 |
| RASGEF1B | SIK2     | 0.062161725 |
| RASGEF1B | TM4SF20  | 0.099745301 |
| SEC16B   | TM4SF20  | 0.079459164 |
| SERPINE1 | SGK1     | 0.061118222 |
| SERPINE1 | SPTLC3   | 0.060811144 |
| SERPINE1 | TM4SF20  | 0.072944461 |
| SGK1     | SH3BP5   | 0.064984218 |
| SGK1     | SIK1     | 0.078345361 |
| SGK1     | SIK1B    | 0.074489287 |
| SGK1     | SIK2     | 0.075513677 |
| SGK1     | SPTLC3   | 0.077573748 |
| SGK1     | SPTSSA   | 0.068700552 |
| SGK1     | TM4SF20  | 0.117629275 |
| SGK1     | TRIM40   | 0.067916961 |
| SGK1     | TRNP1    | 0.06095571  |
| SGK1     | VASH2    | 0.07172202  |
| SH3BP5   | SIK2     | 0.070538961 |

---

---

|          |         |             |
|----------|---------|-------------|
| SH3BP5   | TM4SF20 | 0.063993165 |
| SH3BP5   | VASH2   | 0.066488856 |
| SHB      | SPTLC3  | 0.061897979 |
| SHB      | TM4SF20 | 0.082187063 |
| SIK1     | SIK1B   | 0.157059173 |
| SIK1     | TM4SF20 | 0.089160461 |
| SIK1B    | SLC45A4 | 0.061896306 |
| SIK1B    | TM4SF20 | 0.09429377  |
| SIK2     | TM4SF20 | 0.070295108 |
| SIK2     | VASH2   | 0.078869525 |
| SLC25A45 | TM4SF20 | 0.067330531 |
| SLC45A4  | TM4SF20 | 0.070058746 |
| SPTLC3   | TM4SF20 | 0.119458954 |
| SPTLC3   | TRIM40  | 0.066774418 |
| SPTSSA   | TM4SF20 | 0.066485125 |
| TM4SF20  | TM4SF4  | 0.096527992 |
| TM4SF20  | TNFAIP2 | 0.066125005 |
| TM4SF20  | TRIM40  | 0.123369333 |
| TM4SF20  | TRNP1   | 0.073904471 |
| TM4SF20  | TSHZ3   | 0.076922246 |
| TM4SF20  | TSPAN13 | 0.112511951 |
| TM4SF20  | UGT1A8  | 0.061616632 |
| TM4SF20  | VASH2   | 0.063290656 |

---
